# Supplementary material for: Dispersion-induced cooperative hydrogen atom transfer for radical iodoalkylation
Source: Royal Society of Chemistry journal article supplement (doi:10.1039/d4cc03908d), 2024-01-01

*Supporting Information for*

**Dispersion-Induced Cooperative Hydrogen Atom Transfer for Radical  
Iodoalkylation**

Shaoqun Zhu,<sup>\*a</sup> Lizi Jia,<sup>a</sup> Qi Cheng,<sup>a</sup> Ying Han,<sup>a</sup> Qiu Sun,<sup>a</sup> Huaguang Yu,<sup>b</sup> Xiaoyun Chen,<sup>c</sup> and Hong Hou<sup>a</sup>

<sup>a</sup>School of Chemistry & Chemical Engineering, Yangzhou University, Yangzhou 225009, China

<sup>b</sup>Key Laboratory of Optoelectronic Chemical Materials and Devices, Ministry of Education, College of Optoelectronic Materials and Technology, Jiangnan University, Wuhan 430056, China

<sup>c</sup>School of Environmental and Chemical Engineering, Jiangsu University of Science and Technology, Zhenjiang 212005, China

[shaoqun.zhu@yzu.edu.cn](mailto:shaoqun.zhu@yzu.edu.cn)

**1. General information**

Unless otherwise noted, all commercially available compounds were used as provided without further purification. Solvents used in reactions were p.A. grade and dried only if indicated. Solvents for chromatography were technical grade and distilled prior to use. Analytical thin-layer chromatography (TLC) was performed on Merck silica gel aluminium plates with F-254 indicator, visualized by irradiation with UV light. Column chromatography was performed using silica gel Merck 60 (particle size 0.063–0.2 mm). Melting points were measured on a Yanaco Micro Melting Point Apparatus. <sup>1</sup>H NMR, <sup>13</sup>C NMR and <sup>19</sup>F NMR were recorded on a Variance VNMR 400 or Bruker AV-600 spectrometer in CDCl<sub>3</sub>. For <sup>1</sup>H NMR spectra, data are quoted in the following order: chemical shift ( $\delta$ ) in parts per million (ppm) downfield of tetramethylsilane, using residual protonated solvent as internal standard (CDCl<sub>3</sub> at 7.26 ppm). Multiplicities are indicated s (singlet), d (doublet), t (triplet), m (multiplet), dd (doublet of doublets), coupling constants (*J*) are in Hertz (Hz). For proton-decoupled <sup>13</sup>C NMR spectra, chemical shifts (*J*) are also quoted in parts per million (ppm) downfield of tetramethylsilane, using deuterated solvent as internal standard (CDCl<sub>3</sub> at 77.0 ppm). High resolution mass spectra (HRMS) were obtained on AB 5800 MALDI-TOF/TOF and are recorded using electrospray ionization (ESI). X-ray crystallographic data were collected using D8 quest X-ray diffractometer. UV-Visible absorption spectroscopies were recorded on a fluorescence photometer (UV-1750, 190-1100nm).

**2. Preparation of starting materials**

**2.1) General procedure for the synthesis of indole-3-carboxaldehyde derivatives**

**2f-2r, 1x-1ad** were prepared according to the previous reported procedures. Citations to the references containing characterization data for these compounds: **2f**<sup>1</sup>, **2g**<sup>2</sup>, **2h**<sup>3</sup>, **2i**<sup>3</sup>, **2j**<sup>4</sup>, **2k**<sup>5</sup>, **2m**, **2n**<sup>3</sup>,

**2q<sup>4</sup>, 1x<sup>6</sup>, 1y<sup>6</sup>, 1z<sup>6</sup>, 1aa<sup>6</sup>, 1ab<sup>6</sup>, 1ac<sup>6</sup>, 1ad<sup>6</sup>** are consistent with the previous reports. **1a-1w** were purchased from energy-chemical, bidepharm and leyan chemical.

## 2.2) Preparation of **2l**

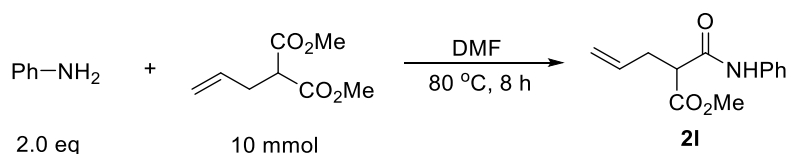

To a solution of aniline (2.0 equiv, 20 mmol, 1.86 g, 1.8 mL) in DMF (20.0 mL), dimethyl allylmalonate (10 mmol, 1.63 mL) was added dropwise at room temperature. The mixture was stirred at 80 °C for 8 h and then diluted with H<sub>2</sub>O and extracted with ethyl acetate. Combined organic layers were dried over Na<sub>2</sub>SO<sub>4</sub>, concentrated under reduced pressure and purified by flash column chromatography on silica gel (ethyl acetate /petroleum ether = 1:15) to give the desired product **2l** as reddish brown solid (1.0 g, 43% yield). <sup>1</sup>H NMR (400 MHz, CDCl<sub>3</sub>): δ 8.75 (s, 1H), 7.53 (d, *J* = 8.0 Hz, 2H), 7.29 (t, *J* = 8.0 Hz, 2H), 7.10 (t, *J* = 8.0 Hz, 1H), 5.82-5.72 (m, 1H), 5.09 (dd, *J* = 28.0, 12.0 Hz, 2H), 3.74 (s, 3H), 3.48 (t, *J* = 8.0 Hz, 1H), 2.73 (t, *J* = 8.0 Hz, 2H). <sup>13</sup>C NMR (101 MHz, CDCl<sub>3</sub>): δ 171.5, 166.0, 137.4, 133.6, 128.8, 124.5, 120.1, 117.9, 53.0, 52.5, 34.6. HRMS (ESI) *m/z*: [M+H]<sup>+</sup> calcd for C<sub>13</sub>H<sub>16</sub>NO<sub>3</sub><sup>+</sup> 234.1125; found 234.1128.

## 3. Unsuccessful examples

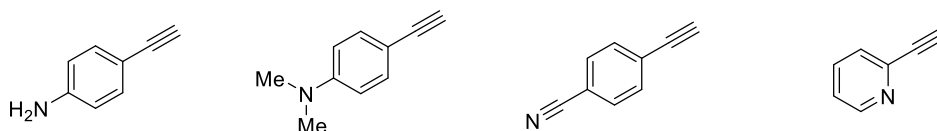

The above terminal alkynes were tested under both of the radical iodoalkylative cyclization and iodoalkylation conditions, and very low reaction conversions were observed for those cases.

## 4. General procedure for the three-component radical iodoalkylative cyclization

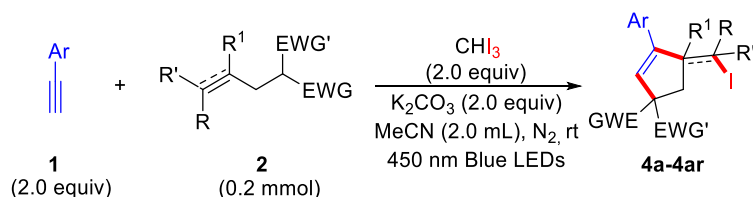

Terminal alkynes **1** (2.0 equiv, 0.4 mmol), K<sub>2</sub>CO<sub>3</sub> (2.0 equiv, 0.4 mmol, 55.3 mg), CHI<sub>3</sub> (2.0 equiv, 0.4 mmol, 156.0 mg) and a stir bar were added to a sealed tube under a nitrogen atmosphere, MeCN (2.0 mL) as solvent and **2** (0.2 mmol, 1.0 equiv) were added, respectively. The reaction mixture was then stirred under a 450 nm blue LEDs irradiation for 12 h at room temperature. The crude mixture was directly purified by flash column chromatography on silica gel (ethyl acetate/petroleum ether = 1:30 to 1:3) to give the desired products **4a-4ar**.

## 5. Characterization data of iodoalkylative cyclization products

### Dimethyl 3-(4-chlorophenyl)-4-(iodomethyl) cyclopent-2-ene-1,1-dicarboxylate (4a)

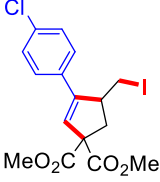

Yellow solid (69.0 mg, 79% yield); m.p. 106-108 °C;  $R_f = 0.25$  (ethyl acetate/petroleum ether, 1:30);  $^1\text{H NMR}$  (400 MHz,  $\text{CDCl}_3$ ):  $\delta$  7.35-7.30 (m, 4H), 6.21 (d,  $J = 1.6$  Hz, 1H), 3.79 (s, 3H), 3.74 (s, 3H), 3.64-3.58 (m, 1H), 3.36 (dd,  $J = 10.0, 2.8$  Hz, 1H), 3.09 (t,  $J = 12.0$  Hz, 1H), 2.92 (q,  $J = 8.0$  Hz, 1H), 2.50 (dd,  $J = 12.0, 4.0$  Hz, 1H).  $^{13}\text{C NMR}$  (101 MHz,  $\text{CDCl}_3$ ):  $\delta$  170.9, 147.7, 134.3, 132.3, 128.9, 127.9, 126.1 (d,  $J = 5.1$  Hz, 1C), 64.8, 53.0 (d,  $J = 4.0$  Hz, 1C), 47.3, 38.4, 10.9. HRMS (ESI) m/z:  $[\text{M}+\text{Na}]^+$  calcd for  $\text{C}_{16}\text{H}_{16}\text{ClINaO}_4^+$  456.9674; found 456.9685.

### Dimethyl 3-(4-fluorophenyl)-4-(iodomethyl) cyclopent-2-ene-1,1-dicarboxylate (4b)

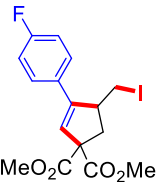

Yellow oil (70.6 mg, 84% yield);  $R_f = 0.25$  (ethyl acetate/petroleum ether, 1:30);  $^1\text{H NMR}$  (400 MHz,  $\text{CDCl}_3$ ):  $\delta$  7.38-7.34 (m, 2H), 7.07-7.03 (m, 2H), 6.16 (d,  $J = 4.0$  Hz, 1H), 3.79 (s, 3H), 3.74 (s, 3H), 3.65-3.58 (m, 1H), 3.37 (dd,  $J = 8.0, 4.0$  Hz, 1H), 3.09 (t,  $J = 8.0$  Hz, 1H), 2.92 (dd,  $J = 12.0, 8.0$  Hz, 1H), 2.50 (dd,  $J = 16.0, 4.0$  Hz, 1H).  $^{13}\text{C NMR}$  (101 MHz,  $\text{CDCl}_3$ ):  $\delta$  171.0, 162.7 (d,  $J_{\text{C-F}} = 249.5$  Hz, 1C), 147.8, 129.9, 128.4 (d,  $J_{\text{C-F}} = 8.1$  Hz, 1C), 125.3, 115.7 (d,  $J = 21.2$  Hz, 1C), 64.8, 53.0, 47.5, 38.5, 11.1.  $^{19}\text{F NMR}$  (376 MHz,  $\text{CDCl}_3$ ): -112.61. HRMS (ESI) m/z:  $[\text{M}+\text{Na}]^+$  calcd for  $\text{C}_{16}\text{H}_{16}\text{FINaO}_4^+$  440.9970; found 440.9977.

### Dimethyl 3-(4-bromophenyl)-4-(iodomethyl) cyclopent-2-ene-1,1-dicarboxylate (4c)

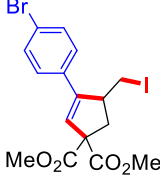

Yellow solid (83.9 mg, 88% yield); m.p. 78-80 °C;  $R_f = 0.25$  (ethyl acetate/petroleum ether, 1:30);  $^1\text{H NMR}$  (400 MHz,  $\text{CDCl}_3$ ):  $\delta$  7.50-7.47 (m, 2H), 7.25 (dd,  $J = 1.2, 4.0$  Hz, 2H), 6.22 (d,  $J = 1.6$  Hz, 1H), 3.79 (s, 3H), 3.74 (s, 3H), 3.64-3.57 (m, 1H), 3.35 (q,  $J = 4.0$  Hz, 1H), 3.09 (t,  $J = 8.0$  Hz, 1H), 2.92 (q,  $J = 8.0$  Hz, 1H), 2.49 (dd,  $J = 8.0, 16.0$  Hz, 1H).  $^{13}\text{C NMR}$  (101 MHz,  $\text{CDCl}_3$ ):  $\delta$  170.9, 147.8, 132.7, 131.9, 128.2, 126.1 (d,  $J = 5.1$  Hz, 1C), 122.5, 64.8, 53.0 (d,  $J = 4.0$  Hz, 1C), 47.2, 38.4, 10.9. HRMS (ESI) m/z:  $[\text{M}+\text{Na}]^+$  calcd for  $\text{C}_{16}\text{H}_{16}\text{BrINaO}_4^+$  500.9169; found 500.9168.

### Dimethyl 4-(iodomethyl)-3-(p-tolyl) cyclopent-2-ene-1,1-dicarboxylate (4d)

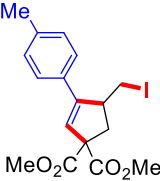

Yellow solid (75.3 mg, 91% yield); m.p. 74-76 °C;  $R_f = 0.25$  (ethyl acetate/petroleum ether, 1:30);  $^1\text{H NMR}$  (400 MHz,  $\text{CDCl}_3$ ):  $\delta$  7.28 (d,  $J = 8.0$  Hz, 2H), 7.16 (d,  $J = 8.0$  Hz, 2H), 6.17 (d,  $J = 4.0$  Hz, 1H), 3.79 (s, 3H), 3.73 (s, 3H), 3.68-3.62 (m, 1H), 3.41 (dd,  $J = 12.0, 4.0$  Hz, 1H), 3.09 (t,  $J = 8.0$  Hz, 1H), 2.91 (q,  $J = 8.0$  Hz, 1H), 2.51 (dd,  $J = 16.0, 4.0$  Hz, 1H), 2.35 (s, 3H).  $^{13}\text{C NMR}$  (101 MHz,  $\text{CDCl}_3$ ):  $\delta$  171.2, 171.2, 148.7, 138.5, 130.9, 129.4, 126.51, 124.4 (d,  $J = 4.0$  Hz, 1C), 64.7, 52.9, 47.5, 38.5, 21.2 (d,  $J = 2.0$  Hz, 1C), 11.5. HRMS (ESI) m/z:  $[\text{M}+\text{Na}]^+$  calcd for  $\text{C}_{17}\text{H}_{19}\text{INaO}_4^+$  437.0220; found 437.0215.

#### Dimethyl 3-(4-ethylphenyl)-4-(iodomethyl) cyclopent-2-ene-1,1-dicarboxylate (4e)

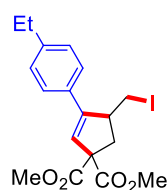

Yellow oil (71.2 mg, 83% yield);  $R_f = 0.25$  (ethyl acetate/petroleum ether, 1:20);  $^1\text{H NMR}$  (400 MHz,  $\text{CDCl}_3$ ):  $\delta$  7.31 (d,  $J = 8.0$  Hz, 2H), 7.19 (d,  $J = 8.0$  Hz, 2H), 6.18 (d,  $J = 1.6$  Hz, 1H), 3.79 (s, 3H), 3.73 (s, 3H), 3.70-3.63 (m, 1H), 3.43 (dd,  $J = 8.0, 2.8$  Hz, 1H), 3.09 (t,  $J = 12.0$  Hz, 1H), 2.92 (q,  $J = 8.0$  Hz, 1H), 2.65 (q,  $J = 8.0$  Hz, 2H), 2.50 (dd,  $J = 16.0, 4.0$  Hz, 1H), 1.23 (t,  $J = 8.0$  Hz, 3H).  $^{13}\text{C NMR}$  (101 MHz,  $\text{CDCl}_3$ ): 171.2, 171.2, 148.7, 144.8, 131.1, 128.2, 126.6, 124.4, 64.7, 52.9 (d,  $J = 4.0$  Hz, 1C), 47.5, 38.5, 28.6, 15.4, 11.5. HRMS (ESI)  $m/z$ :  $[\text{M}+\text{Na}]^+$  calcd for  $\text{C}_{18}\text{H}_{21}\text{I}\text{NaO}_4^+$  451.0377; found 451.0369.

#### Dimethyl 4-(iodomethyl)-3-(4-propylphenyl) cyclopent-2-ene-1,1-dicarboxylate (4f)

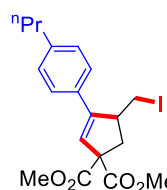

Yellow oil (63.0 mg, 71% yield);  $R_f = 0.25$  (ethyl acetate/petroleum ether, 1:30);  $^1\text{H NMR}$  (400 MHz,  $\text{CDCl}_3$ ):  $\delta$  7.30 (d,  $J = 8.0$  Hz, 2H), 7.17 (d,  $J = 8.0$  Hz, 2H), 6.18 (d,  $J = 4.0$  Hz, 1H), 3.79 (s, 3H), 3.73 (s, 3H), 3.70-3.63 (m, 1H), 3.43 (dd,  $J = 12.0, 4.0$  Hz, 1H), 3.09 (t,  $J = 12.0$  Hz, 1H), 2.91 (dd,  $J = 12.0, 8.0$  Hz, 1H), 2.58 (t,  $J = 8.0$  Hz, 2H), 2.51 (dd,  $J = 12.0, 4.0$  Hz, 1H), 1.64 (dd,  $J = 12.0, 8.0$  Hz, 2H), 0.94 (t,  $J = 8.0$  Hz, 3H).  $^{13}\text{C NMR}$  (101 MHz,  $\text{CDCl}_3$ ):  $\delta$  171.2, 171.2, 148.7, 143.3, 131.1, 128.8, 126.5, 124.4, 64.7, 52.9 (d,  $J = 4.0$  Hz, 1C), 47.5, 38.5, 37.7, 24.4, 13.8, 11.5. HRMS (ESI)  $m/z$ :  $[\text{M}+\text{Na}]^+$  calcd for  $\text{C}_{19}\text{H}_{23}\text{I}\text{NaO}_4^+$  465.0533; found 465.0524.

#### Dimethyl 3-(4-butylphenyl)-4-(iodomethyl) cyclopent-2-ene-1,1-dicarboxylate (4g)

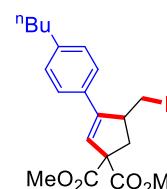

Yellow oil (76.5 mg, 84% yield);  $R_f = 0.25$  (ethyl acetate/petroleum ether, 1:30);  $^1\text{H NMR}$  (400 MHz,  $\text{CDCl}_3$ ):  $\delta$  7.30 (d,  $J = 8.0$  Hz, 2H), 7.17 (d,  $J = 8.0$  Hz, 2H), 6.18 (d,  $J = 4.0$  Hz, 1H), 3.79 (s, 3H), 3.73 (s, 3H), 3.70-3.62 (m, 1H), 3.43 (dd,  $J = 12.0, 4.0$  Hz, 1H), 3.09 (t,  $J = 12.0$  Hz, 1H), 2.91 (dd,  $J = 12.0, 4.0$  Hz, 1H), 2.60 (t,  $J = 8.0$  Hz, 2H), 2.51 (dd,  $J = 12.0, 4.0$  Hz, 1H), 1.61-1.57 (m, 2H), 1.40-1.32 (m, 2H), 0.93 (t,  $J = 8.0$  Hz, 3H).  $^{13}\text{C NMR}$  (101 MHz,  $\text{CDCl}_3$ ):  $\delta$  171.2 (d,  $J = 6.1$  Hz, 1C), 148.7, 143.5, 131.0, 128.8, 126.5, 124.4, 64.7, 52.9 (d,  $J = 1.0$  Hz, 1C), 47.5, 38.5, 35.4, 33.5, 22.3, 13.9, 11.5. HRMS (ESI)  $m/z$ :  $[\text{M}+\text{Na}]^+$  calcd for  $\text{C}_{20}\text{H}_{25}\text{I}\text{NaO}_4^+$  479.0690; found 479.0701.

#### Dimethyl 3-(4-(tert-butyl) phenyl)-4-(iodomethyl) cyclopent-2-ene-1,1-dicarboxylate (4h)

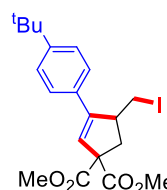

Yellow oil (83.5 mg, 92% yield);  $R_f = 0.25$  (ethyl acetate/petroleum ether, 1:30);  $^1\text{H NMR}$  (400 MHz,  $\text{CDCl}_3$ ):  $\delta$  7.37 (d,  $J = 4.0$  Hz, 1H), 7.32 (d,  $J = 4.0$  Hz, 1H), 6.19 (d,  $J = 4.0$  Hz, 1H), 3.79 (s, 3H), 3.73 (s, 3H), 3.71-3.64 (m, 1H), 3.45 (dd,  $J = 8.0, 4.0$  Hz, 1H), 3.08 (t,  $J = 8.0$  Hz, 1H), 2.92 (dd,  $J = 12.0, 8.0$  Hz, 1H), 2.50 (dd,  $J = 16.0, 4.0$  Hz, 1H), 1.32 (s, 9H).  $^{13}\text{C NMR}$  (101 MHz,  $\text{CDCl}_3$ ):  $\delta$  171.2, 171.2, 151.7, 148.5, 130.8, 126.3, 125.6, 124.5, 64.7, 52.9 (d,  $J = 5.0$  Hz, 1C), 47.6, 38.6, 34.6, 31.2, 11.5. HRMS (ESI)  $m/z$ :  $[\text{M}+\text{Na}]^+$  calcd for  $\text{C}_{20}\text{H}_{25}\text{I}\text{NaO}_4^+$  479.0690; found 479.0689.

#### Dimethyl 4-(iodomethyl)-3-(4-methoxyphenyl) cyclopent-2-ene-1,1-dicarboxylate (4i)

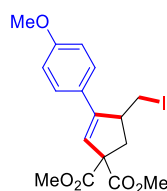

Yellow oil (58.6 mg, 68% yield);  $R_f = 0.25$  (ethyl acetate/petroleum ether, 1:30);  $^1\text{H NMR}$  (400 MHz,  $\text{CDCl}_3$ ):  $\delta$  7.32 (dd,  $J = 4.0, 2.0$  Hz, 2H), 6.88 (dd,  $J = 4.0, 2.0$  Hz, 2H), 6.11 (d,  $J = 4.0$  Hz, 1H), 3.81 (s, 3H), 3.79 (s, 3H), 3.73 (s, 3H), 3.66-3.60 (m, 1H), 3.41 (dd,  $J = 12.0, 4.0$  Hz, 1H), 3.09 (t,  $J = 8.0$  Hz, 1H), 2.89 (q,  $J = 8.0$  Hz, 1H), 2.51 (dd,  $J = 16.0, 4.0$  Hz, 1H).  $^{13}\text{C NMR}$  (101 MHz,  $\text{CDCl}_3$ ):  $\delta$  171.3, 171.3, 159.8, 148.2, 127.9, 126.2, 123.3, 114.1, 64.7, 55.3, 52.9 (d,  $J = 3.0$  Hz, 1C), 47.6, 38.5, 11.5. HRMS (ESI)  $m/z$ :  $[\text{M}+\text{Na}]^+$  calcd for  $\text{C}_{17}\text{H}_{19}\text{INaO}_5^+$  453.0169; found 453.0176.

#### Dimethyl 3-(4-acetylphenyl)-4-(iodomethyl)cyclopent-2-ene-1,1-dicarboxylate (4j)

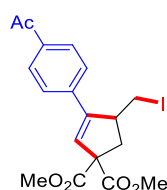

Yellow solid (61.5 mg, 70% yield); m.p. 130-132 °C;  $R_f = 0.25$  (ethyl acetate/petroleum ether, 1:9);  $^1\text{H NMR}$  (400 MHz,  $\text{CDCl}_3$ ):  $\delta$  7.94 (d,  $J = 8.0$  Hz, 2H), 7.47 (d,  $J = 8.0$  Hz, 2H), 6.33 (d,  $J = 1.2$  Hz, 1H), 3.80 (s, 3H), 3.74 (s, 3H), 3.70-3.65 (m, 1H), 3.36 (dd,  $J = 12.0, 4.0$  Hz, 1H), 3.11 (t,  $J = 12.0$  Hz, 1H), 2.94 (q,  $J = 8.0$  Hz, 1H), 2.60 (s, 3H), 2.50 (dd,  $J = 12.0, 4.0$  Hz, 1H).  $^{13}\text{C NMR}$  (101 MHz,  $\text{CDCl}_3$ ):  $\delta$  197.3, 170.7, 147.9, 138.4, 136.7, 128.7, 127.8, 126.8, 64.9, 53.0, 47.1, 38.4, 26.6, 10.8. HRMS (ESI)  $m/z$ :  $[\text{M}+\text{Na}]^+$  calcd for  $\text{C}_{18}\text{H}_{19}\text{INaO}_5^+$  465.0170; found 465.0162.

#### Dimethyl 4-(iodomethyl)-3-(4-(trifluoromethyl)phenyl)cyclopent-2-ene-1,1-dicarboxylate (4k)

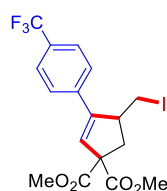

Yellow solid (79.6 mg, 85% yield); m.p. 78-80 °C;  $R_f = 0.25$  (ethyl acetate/petroleum ether, 1:30);  $^1\text{H NMR}$  (400 MHz,  $\text{CDCl}_3$ ):  $\delta$  7.62 (d,  $J = 8.0$  Hz, 2H), 7.49 (d,  $J = 8.0$  Hz, 2H), 6.31 (d,  $J = 1.6$  Hz, 1H), 3.81 (s, 3H), 3.75 (s, 3H), 3.69-3.62 (m, 1H), 3.36 (dd,  $J = 12.0, 4.0$  Hz, 1H), 3.10 (t,  $J = 12.0$  Hz, 1H), 2.96 (q,  $J = 8.0$  Hz, 1H), 2.50 (dd,  $J = 16.0, 4.0$  Hz, 1H).  $^{13}\text{C NMR}$  (101 MHz,  $\text{CDCl}_3$ ):  $\delta$  170.7, 147.7, 137.4 (d,  $J_{\text{C-F}} = 1.0$  Hz, 1C), 130.3 (q,  $J_{\text{C-F}} = 33.3$  Hz, 1C), 127.8 (d,  $J_{\text{C-F}} = 8.1$  Hz, 1C), 127.0, 125.7 (d,  $J_{\text{C-F}} = 3.0$  Hz, 1C), 122.6, 64.9, 53.1 (d,  $J = 7.1$  Hz, 1C), 47.2, 38.4, 10.7.  $^{19}\text{F NMR}$  (376 MHz,  $\text{CDCl}_3$ ): -62.7. HRMS (ESI)  $m/z$ :  $[\text{M}+\text{Na}]^+$  calcd for  $\text{C}_{17}\text{H}_{16}\text{F}_3\text{INaO}_4^+$  490.9938; found 490.9943.

#### Dimethyl 3-([1,1'-biphenyl]-4-yl)-4-(iodomethyl)cyclopent-2-ene-1,1-dicarboxylate (4l)

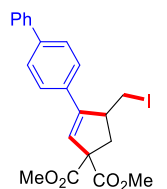

Yellow solid (87.3 mg, 92% yield); m.p. 128-130 °C;  $R_f = 0.25$  (ethyl acetate/petroleum ether, 1:30);  $^1\text{H NMR}$  (400 MHz,  $\text{CDCl}_3$ ):  $\delta$  7.60 (d,  $J = 8.0$  Hz, 4H), 7.48-7.43 (m, 4H), 7.36 (t,  $J = 8.0$  Hz, 1H), 6.28 (s, 1H), 3.81 (s, 3H), 3.75 (s, 3H), 3.71 (s, 1H), 3.46 (d,  $J = 12.0$  Hz, 1H), 3.14 (t,  $J = 12.0$  Hz, 1H), 2.95 (dd,  $J = 12.0, 8.0$  Hz, 1H), 2.54 (dd,  $J = 12.0, 4.0$  Hz, 1H).  $^{13}\text{C NMR}$  (101 MHz,  $\text{CDCl}_3$ ):  $\delta$  171.1, 171.1, 148.4, 141.3, 140.3, 132.7, 128.8, 127.6, 127.4, 127.1, 127.0, 125.3, 64.8, 53.0, 47.5, 38.5, 11.3. HRMS (ESI)  $m/z$ :  $[\text{M}+\text{Na}]^+$  calcd for  $\text{C}_{22}\text{H}_{21}\text{INaO}_4^+$  499.0377; found 499.0367.

#### Dimethyl 3-(4-acetamidophenyl)-4-(iodomethyl)cyclopent-2-ene-1,1-dicarboxylate (4m)

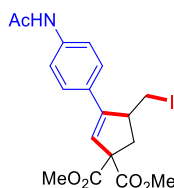

Yellow oil (41.1 mg, 45% yield);  $R_f = 0.25$  (ethyl acetate/petroleum ether, 1:2);  $^1\text{H NMR}$  (400 MHz,  $\text{CDCl}_3$ ):  $\delta$  7.51 (d,  $J = 8.0$  Hz, 1H), 7.43 (s, 1H), 7.33 (d,  $J = 8.0$  Hz, 2H), 6.16 (s, 1H), 3.79 (s, 3H), 3.74 (s, 3H), 3.65-3.59 (m, 1H), 3.39 (dd,  $J = 8.0, 4.0$  Hz, 1H), 3.09 (t,  $J = 8.0$  Hz, 1H), 2.89 (dd,  $J = 12.0, 4.0$  Hz, 1H), 2.50 (d,  $J = 16.0, 4.0$  Hz, 1H), 2.18 (s, 3H).  $^{13}\text{C NMR}$  (101 MHz,  $\text{CDCl}_3$ ):  $\delta$  171.3, 171.0, 149.0, 136.0, 134.1, 130.7, 128.4, 128.2, 127.9, 125.7, 64.9, 52.9, 49.1, 38.7, 20.4, 11.5. HRMS (ESI)  $m/z$ :  $[\text{M}+\text{Na}]^+$  calcd for  $\text{C}_{18}\text{H}_{20}\text{INNaO}_5^+$  480.0278; found 480.027.

#### Dimethyl 3-(4-ethynylphenyl)-4-(iodomethyl) cyclopent-2-ene-1,1-dicarboxylate (4n)

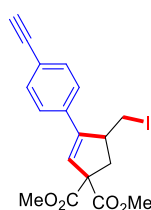

Yellow oil (43.1 mg, 51% yield);  $R_f = 0.25$  (ethyl acetate/petroleum ether, 1:30);  $^1\text{H NMR}$  (400 MHz,  $\text{CDCl}_3$ ):  $\delta$  7.48 (d,  $J = 8.0$  Hz, 2H), 7.35 (d,  $J = 8.0$  Hz, 2H), 6.25 (d,  $J = 4.0$  Hz, 1H), 3.80 (s, 3H), 3.74 (s, 3H), 3.67-3.61 (m, 1H), 3.37 (dd,  $J = 8.0, 4.0$  Hz, 1H), 3.14 (s, 1H), 3.09 (t,  $J = 12.0$  Hz, 1H), 2.92 (dd,  $J = 12.0, 8.0$  Hz, 1H), 2.51 (dd,  $J = 16.0, 4.0$  Hz, 1H).  $^{13}\text{C NMR}$  (101 MHz,  $\text{CDCl}_3$ )  $\delta$  170.9, 148.1, 134.2, 132.4, 126.5, 126.4, 122.1, 83.2, 78.4, 64.8, 53.0, 47.2, 38.4, 11.0. HRMS (ESI)  $m/z$ :  $[\text{M}+\text{Na}]^+$  calcd for  $\text{C}_{18}\text{H}_{17}\text{INaO}_4^+$  447.0064; found 447.0075.

#### Dimethyl 3-(3-chlorophenyl)-4-(iodomethyl) cyclopent-2-ene-1,1-dicarboxylate (4o)

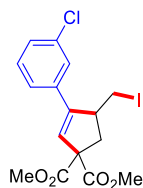

Yellow oil (45.5 mg, 84% yield);  $R_f = 0.25$  (ethyl acetate/petroleum ether, 1:30);  $^1\text{H NMR}$  (400 MHz,  $\text{CDCl}_3$ ):  $\delta$  7.38 (s, 1H), 7.30-7.27 (m, 2H), 7.25-7.24 (m, 1H), 6.24 (d,  $J = 1.6$  Hz, 1H), 3.80 (s, 3H), 3.74 (s, 3H), 3.64-3.58 (m, 1H), 3.37 (dd,  $J = 12.0, 4.0$  Hz, 1H), 3.10 (t,  $J = 8.0$  Hz, 1H), 2.92 (dd,  $J = 16.0, 8.0$  Hz, 1H), 2.50 (dd,  $J = 12.0, 4.0$  Hz, 1H).  $^{13}\text{C NMR}$  (101 MHz,  $\text{CDCl}_3$ ):  $\delta$  170.8, 147.6, 135.7, 134.7, 130.0, 128.5 (d,  $J = 3.0$  Hz, 1C), 126.9, 126.8, 124.8, 64.8, 53.1 (d,  $J = 1.6$  Hz, 1C), 47.2, 38.4, 10.9. HRMS (ESI)  $m/z$ :  $[\text{M}+\text{Na}]^+$  calcd for  $\text{C}_{16}\text{H}_{16}\text{ClINaO}_4^+$  456.9674; found 456.9676.

#### Dimethyl 3-(3-fluorophenyl)-4-(iodomethyl) cyclopent-2-ene-1,1-dicarboxylate (4p)

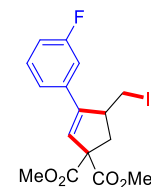

Yellow oil (57.0 mg, 68% yield);  $R_f = 0.25$  (ethyl acetate/petroleum ether, 1:30);  $^1\text{H NMR}$  (400 MHz,  $\text{CDCl}_3$ ):  $\delta$  7.35-7.30 (m, 1H), 7.17-7.07 (m, 2H), 7.03-6.99 (m, 1H), 6.24 (d,  $J = 4.0$  Hz, 1H), 3.80 (s, 3H), 3.74 (s, 3H), 3.65-3.58 (m, 1H), 3.38 (dd,  $J = 12.0, 4.0$  Hz, 1H), 3.11 (t,  $J = 12.0$  Hz, 1H), 2.93 (dd,  $J = 12.0, 8.0$  Hz, 1H), 2.51 (dd,  $J = 12.0, 4.0$  Hz, 1H).  $^{13}\text{C NMR}$  (101 MHz,  $\text{CDCl}_3$ ):  $\delta$  170.8, 163.0 (d,  $J_{\text{C-F}} = 248.5$  Hz, 1C), 147.7 (d,  $J_{\text{C-F}} = 3.0$  Hz, 1C), 136.0 (d,  $J_{\text{C-F}} = 7.1$  Hz, 1C), 130.3 (d,  $J_{\text{C-F}} = 8.1$  Hz, 1C), 126.7, 122.3, 115.4 (d,  $J_{\text{C-F}} = 22.2$  Hz, 1C), 113.5 (d,  $J_{\text{C-F}} = 12.2$  Hz, 1C), 64.8, 53.0, 47.3, 38.4, 10.9.  $^{19}\text{F NMR}$  (376 MHz,  $\text{CDCl}_3$ ): -112.5. HRMS (ESI)  $m/z$ :  $[\text{M}+\text{Na}]^+$  calcd for  $\text{C}_{16}\text{H}_{16}\text{FINaO}_4^+$  440.9970; found 440.9978.

#### Dimethyl 3-(3-bromophenyl)-4-(iodomethyl) cyclopent-2-ene-1,1-dicarboxylate (4q)

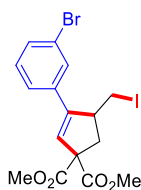

Yellow oil (63.4 mg, 66% yield);  $R_f = 0.25$  (ethyl acetate/petroleum ether, 1:30);  $^1\text{H}$  NMR (400 MHz,  $\text{CDCl}_3$ ):  $\delta$  7.54 (t,  $J = 4.0$  Hz, 1H), 7.45-7.43 (m, 1H), 7.31-7.28 (m, 1H), 7.23 (t,  $J = 8.0$  Hz, 1H), 6.23 (d,  $J = 4.0$  Hz, 1H), 3.80 (s, 3H), 3.74 (s, 3H), 3.64-3.57 (m, 1H), 3.36 (dd,  $J = 12.0, 4.0$  Hz, 1H), 3.10 (t,  $J = 8.0$  Hz, 1H), 2.92 (dd,  $J = 12.0, 8.0$  Hz, 1H), 2.49 (dd,  $J = 16.0, 8.0$  Hz, 1H).  $^{13}\text{C}$  NMR (101 MHz,  $\text{CDCl}_3$ ):  $\delta$  170.8, 170.8, 147.5, 136.0, 131.4, 130.3, 129.6, 126.9, 125.2, 122.9, 64.8, 53.0, 47.2 38.4, 10.9. HRMS (ESI)  $m/z$ :  $[\text{M}+\text{Na}]^+$  calcd for  $\text{C}_{16}\text{H}_{16}\text{BrINaO}_4^+$  500.9169; found 500.9177.

#### Dimethyl 4-(iodomethyl)-3-(3-methoxyphenyl) cyclopent-2-ene-1,1-dicarboxylate (4r)

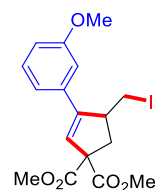

Yellow oil (58.1 mg, 68% yield);  $R_f = 0.25$  (ethyl acetate/petroleum ether, 1:15);  $^1\text{H}$  NMR (400 MHz,  $\text{CDCl}_3$ ):  $\delta$  7.28 (t,  $J = 8.0$  Hz, 1H), 6.97 (d,  $J = 8.0$  Hz, 1H), 6.92 (d,  $J = 4.0$  Hz, 1H), 6.88-6.85 (m, 1H), 6.22 (d,  $J = 1.6$  Hz, 1H), 3.83 (s, 3H), 3.80 (s, 3H), 3.74 (s, 3H), 3.68-3.61 (m, 1H), 3.42 (dd,  $J = 12.0, 4.0$  Hz, 1H), 3.11 (t,  $J = 8.0$  Hz, 1H), 2.93 (dd,  $J = 16.0, 8.0$  Hz, 1H), 2.50 (dd,  $J = 16.0, 4.0$  Hz, 1H).  $^{13}\text{C}$  NMR (101 MHz,  $\text{CDCl}_3$ ):  $\delta$  171.1, 171.0, 159.8, 148.7, 135.2, 129.7, 125.6, 119.0, 113.9, 112.4, 64.8, 55.3, 53.0, 47.5, 38.5, 11.3. HRMS (ESI)  $m/z$ :  $[\text{M}+\text{Na}]^+$  calcd for  $\text{C}_{17}\text{H}_{19}\text{INaO}_5^+$  453.0169; found 453.0161.

#### Dimethyl 3-(2-chlorophenyl)-4-(iodomethyl) cyclopent-2-ene-1,1-dicarboxylate (4s)

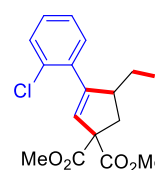

Yellow oil (73.7 mg, 85% yield);  $R_f = 0.25$  (ethyl acetate/petroleum ether, 1:30);  $^1\text{H}$  NMR (400 MHz,  $\text{CDCl}_3$ ):  $\delta$  7.38-7.36 (m, 1H), 7.32-7.30 (m, 1H), 7.27-7.23 (m, 2H), 6.11 (d,  $J = 1.6$  Hz, 1H), 3.81 (s, 4H), 3.75 (s, 3H), 3.23-3.20 (m, 1H), 3.04-2.95 (m, 2H), 2.35-2.30 (m, 1H).  $^{13}\text{C}$  NMR (101 MHz,  $\text{CDCl}_3$ ):  $\delta$  171.0, 170.6, 147.9, 133.7, 132.3, 131.2, 130.1 (d,  $J = 5.1$  Hz, 1H), 130.0, 129.4, 126.8, 64.7, 53.0 (t,  $J = 4.0$  Hz, 1C), 47.9, 38.9, 11.4. HRMS (ESI)  $m/z$ :  $[\text{M}+\text{Na}]^+$  calcd for  $\text{C}_{16}\text{H}_{16}\text{ClINaO}_4^+$  456.9674; found 456.9674.

#### Dimethyl 4-(iodomethyl)-3-(o-tolyl) cyclopent-2-ene-1,1-dicarboxylate (4t)

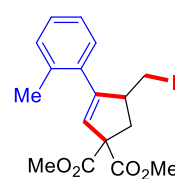

Yellow oil (79.8 mg, 96% yield);  $R_f = 0.25$  (ethyl acetate/petroleum ether, 1:30);  $^1\text{H}$  NMR (400 MHz,  $\text{CDCl}_3$ ):  $\delta$  7.21-7.13 (m, 4H), 5.95 (d,  $J = 4.0$  Hz, 1H), 3.81 (s, 3H), 3.74 (s, 3H), 3.62-3.54 (m, 1H), 3.20 (dd,  $J = 8.0, 4.0$  Hz, 1H), 3.03 (d,  $J = 8.0$  Hz, 1H), 2.98 (t,  $J = 8.0$  Hz, 1H), 2.35 (s, 3H), 2.31 (t,  $J = 4.0$  Hz, 1H).  $^{13}\text{C}$  NMR (101 MHz,  $\text{CDCl}_3$ ):  $\delta$  171.3, 170.9, 149.0, 135.9, 134.0, 130.7, 128.3, 128.2, 127.8, 125.6, 64.8, 52.9 (d,  $J = 2.0$  Hz, 1C), 49.0, 38.7, 20.4, 11.5. HRMS (ESI)  $m/z$ :  $[\text{M}+\text{Na}]^+$  calcd for  $\text{C}_{17}\text{H}_{19}\text{INaO}_4^+$  437.0220; found 437.0216.

#### Dimethyl 4-(iodomethyl)-3-phenylcyclopent-2-ene-1,1-dicarboxylate (4u)



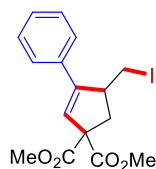

Yellow oil (64.7 mg, 81% yield);  $R_f = 0.25$  (ethyl acetate/petroleum ether, 1:30);  $^1\text{H NMR}$  (400 MHz,  $\text{CDCl}_3$ ):  $\delta$  7.40-7.29 (m, 5H), 6.22 (d,  $J = 4.0$  Hz, 1H), 3.80 (s, 3H), 3.74 (s, 3H), 3.71-3.64 (m, 1H), 3.41 (dd,  $J = 12.0, 4.0$  Hz, 1H), 3.10 (t,  $J = 8.0$  Hz, 1H), 2.93 (q,  $J = 8.0$  Hz, 1H), 2.50 (dd,  $J = 16.0, 4.0$  Hz, 1H).  $^{13}\text{C NMR}$  (101 MHz,  $\text{CDCl}_3$ ):  $\delta$  171.1, 171.1, 148.8, 133.8, 128.7, 128.5, 126.6, 125.3 (d,  $J = 4.04$  Hz, 1C), 64.8, 53.0, 47.4, 38.5, 11.3. HRMS (ESI)  $m/z$ :  $[\text{M}+\text{Na}]^+$  calcd for  $\text{C}_{16}\text{H}_{17}\text{INaO}_4^+$  423.0064; found 423.0069.

#### Dimethyl 4-(iodomethyl)-3-(naphthalen-2-yl) cyclopent-2-ene-1,1-dicarboxylate (4v)

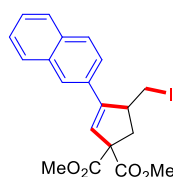

Yellow solid (52.9 mg, 59% yield); m.p. 103-105 °C;  $R_f = 0.25$  (ethyl acetate/petroleum ether, 1:30);  $^1\text{H NMR}$  (400 MHz,  $\text{CDCl}_3$ ):  $\delta$  7.85-7.81 (m, 3H), 7.79 (s, 1H), 7.56 (dd,  $J = 8.0, 4.0$  Hz, 1H), 7.52-7.47 (m, 2H), 6.36 (d,  $J = 4.0$  Hz, 1H), 3.83 (s, 3H), 3.81-3.78 (m, 1H), 3.76 (s, 3H), 3.49 (dd,  $J = 12.0, 4.0$  Hz, 1H), 3.17 (t,  $J = 12.0$  Hz, 1H), 2.98 (dd,  $J = 12.0, 8.0$  Hz, 1H), 2.58 (dd,  $J = 12.0, 4.0$  Hz, 1H).  $^{13}\text{C NMR}$  (101 MHz,  $\text{CDCl}_3$ ):  $\delta$  171.1, 171.1, 148.8, 133.2, 133.2, 131.2, 128.5, 128.2, 127.7, 126.5, 126.5, 125.8, 125.6, 124.6, 64.9, 53.0 (q,  $J = 1.0$  Hz, 1C), 47.5, 38.6, 11.4. HRMS (ESI)  $m/z$ :  $[\text{M}+\text{Na}]^+$  calcd for  $\text{C}_{20}\text{H}_{19}\text{INaO}_4^+$  473.0220; found 473.0220.

#### Dimethyl 4-(iodomethyl)-3-(thiophen-2-yl) cyclopent-2-ene-1,1-dicarboxylate (4w)

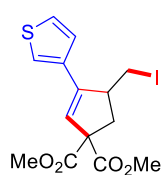

Yellow oil (49.5 mg, 61% yield);  $R_f = 0.25$  (ethyl acetate/petroleum ether, 1:30);  $^1\text{H NMR}$  (400 MHz,  $\text{CDCl}_3$ ):  $\delta$  7.32 (dd,  $J = 4.8, 2.8$  Hz, 1H), 7.24 (dd,  $J = 2.8, 1.2$  Hz, 1H), 7.20 (dd,  $J = 5.2, 1.2$  Hz, 1H), 6.16 (d,  $J = 1.2$  Hz, 1H), 3.78 (s, 3H), 3.74 (s, 3H), 3.60-3.53 (m, 1H), 3.50 (dd,  $J = 12.0, 4.0$  Hz, 1H), 3.14 (t,  $J = 8.0$  Hz, 1H), 2.85 (q,  $J = 8.0$  Hz, 1H), 2.56 (dd,  $J = 16.0, 4.0$  Hz, 1H).  $^{13}\text{C NMR}$  (101 MHz,  $\text{CDCl}_3$ ):  $\delta$  171.1, 171.1, 143.6, 135.4, 126.4, 126.2, 124.3 (d,  $J = 4.04$  Hz, 1C), 122.4, 64.8, 53.0, 48.7, 38.5, 11.1. HRMS (ESI)  $m/z$ :  $[\text{M}+\text{Na}]^+$  calcd for  $\text{C}_{14}\text{H}_{15}\text{INaO}_4\text{S}^+$  428.9628; found 428.9619.

#### Dimethyl (E)-4-(iodomethyl)-3-styrylcyclopent-2-ene-1,1-dicarboxylate (4x)

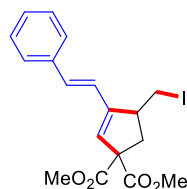

Yellow oil (34.4mg, 40% yield);  $R_f = 0.25$  (ethyl acetate/petroleum ether, 1:30);  $^1\text{H NMR}$  (400 MHz,  $\text{CDCl}_3$ ):  $\delta$  7.42 (d,  $J = 8.0$  Hz, 2H), 7.34 (t,  $J = 8.0$  Hz, 2H), 7.29 (t,  $J = 8.0$  Hz, 1H), 6.80 (d,  $J = 16.0$  Hz, 1H), 6.61 (d,  $J = 16.0$  Hz, 1H), 6.04 (s, 1H), 3.78 (s, 3H), 3.75 (s, 3H), 3.57-3.54 (m, 1H), 3.49 (t,  $J = 8.0$  Hz, 1H), 3.18 (t,  $J = 8.0$  Hz, 1H), 2.79 (q,  $J = 8.0$  Hz, 1H), 2.59 (dd,  $J = 16.0, 8.0$  Hz, 1H).  $^{13}\text{C NMR}$  (101 MHz,  $\text{CDCl}_3$ ):  $\delta$  171.1, 171.1, 147.1, 136.3, 132.1, 128.7, 128.2, 128.1, 126.6, 122.3, 64.6, 53.0 (d,  $J = 6.1$  Hz, 1C), 46.9, 38.6, 11.0. HRMS (ESI):  $[\text{M}+\text{Na}]^+$  calcd for  $\text{C}_{18}\text{H}_{19}\text{INaO}_4^+$  449.0220; found 449.0224.

#### Dimethyl (E)-4-(iodomethyl)-3-(2-methylstyryl)cyclopent-2-ene-1,1-dicarboxylate (4y)



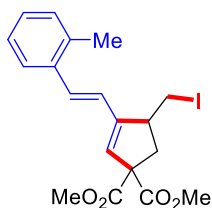

Yellow oil (63.4mg, 72% yield);  $R_f = 0.25$  (ethyl acetate/petroleum ether, 1:30);  $^1\text{H NMR}$  (400 MHz,  $\text{CDCl}_3$ ):  $\delta$  7.46 (t,  $J = 4.0$  Hz, 1H), 7.18 (q,  $J = 4.0$  Hz, 3H), 6.85 (d,  $J = 16.0$  Hz, 1H), 6.67 (d,  $J = 16.0$  Hz, 1H), 6.04 (s, 1H), 3.78 (s, 3H), 3.76 (s, 3H), 3.56 (dd,  $J = 12.0, 4.0$  Hz, 1H), 3.50 (t,  $J = 8.0$  Hz, 1H), 3.21 (t,  $J = 8.0$  Hz, 1H), 2.81 (dd,  $J = 12.0, 8.0$  Hz, 1H), 2.58 (dd,  $J = 4.0, 12.0$  Hz, 1H), 2.38 (s, 3H).  $^{13}\text{C NMR}$  (101 MHz,  $\text{CDCl}_3$ ):  $\delta$  171.1, 147.5, 135.9, 135.5, 130.5, 130.1, 128.1, 127.9, 126.3, 125.3, 123.5, 77.4, 77.0, 76.7, 64.7, 53.0, 47.2, 38.6, 19.9, 10.8. HRMS (ESI)  $m/z$ :  $[\text{M}+\text{Na}]^+$  calcd for  $\text{C}_{19}\text{H}_{21}\text{INaO}_4^+$  463.0377; found 463.0381.

#### Dimethyl (E)-4-(iodomethyl)-3-(2-methylstyryl)cyclopent-2-ene-1,1-dicarboxylate (4z)

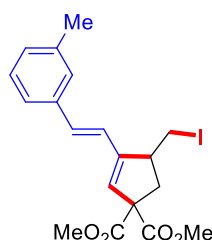

Yellow oil (45.8 mg, 52% yield);  $R_f = 0.25$  (ethyl acetate/petroleum ether, 1:30);  $^1\text{H NMR}$  (400 MHz,  $\text{CDCl}_3$ ):  $\delta$  7.23 (d,  $J = 8.0$  Hz, 3H), 7.10-7.08 (m, 1H), 6.78 (d,  $J = 8.0$  Hz, 1H), 6.58 (d,  $J = 20.0$  Hz, 1H), 6.03 (s, 1H), 3.78 (s, 3H), 3.75 (s, 3H), 3.56 (dd,  $J = 12.0, 4.0$  Hz, 1H), 3.48 (t,  $J = 12.0$  Hz, 1H), 3.18 (t,  $J = 8.0$  Hz, 1H), 2.79 (dd,  $J = 12.0, 8.0$  Hz, 1H), 2.59 (dd,  $J = 12.0, 4.0$  Hz, 1H), 2.36 (s, 3H).  $^{13}\text{C NMR}$  (101 MHz,  $\text{CDCl}_3$ ):  $\delta$  171.1, 147.2, 138.3, 136.3, 132.3, 129.1, 128.6, 127.9, 127.4, 123.7, 122.1, 64.6, 53.0, 47.0, 38.7, 21.4, 11.0. HRMS (ESI)  $m/z$ :  $[\text{M}+\text{Na}]^+$  calcd for  $\text{C}_{19}\text{H}_{21}\text{INaO}_4^+$  463.0377; found 463.0365.

#### Dimethyl (E)-4-(iodomethyl)-3-(4-methylstyryl)cyclopent-2-ene-1,1-dicarboxylate (4aa)

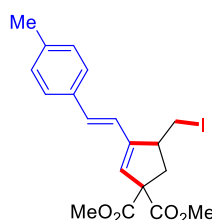

Yellow oil (34.9mg, 43% yield);  $R_f = 0.25$  (ethyl acetate/petroleum ether, 1:30);  $^1\text{H NMR}$  (400 MHz,  $\text{CDCl}_3$ ):  $\delta$  7.32 (d,  $J = 8.0$  Hz, 2H), 7.15 (d,  $J = 8.0$  Hz, 2H), 6.75 (d,  $J = 16.0$  Hz, 1H), 6.58 (d,  $J = 16.0$  Hz, 1H), 6.01 (s, 1H), 3.77 (s, 3H), 3.75 (s, 3H), 3.55 (dd,  $J = 12.0, 4.0$  Hz, 1H), 3.48 (t,  $J = 12.0$  Hz, 1H), 3.17 (t,  $J = 12.0$  Hz, 1H), 2.78 (dd,  $J = 12.0, 8.0$  Hz, 1H), 2.59 (dd,  $J = 12.0, 4.0$  Hz, 1H), 2.35 (s, 3H).  $^{13}\text{C NMR}$  (101 MHz,  $\text{CDCl}_3$ ):  $\delta$  171.1, 147.3, 138.3, 133.6, 132.1, 129.4, 127.5, 126.5, 121.3, 64.6, 53.0, 47.1, 38.7, 21.2, 11.0, 1.0. HRMS (ESI)  $m/z$ :  $[\text{M}+\text{Na}]^+$  calcd for  $\text{C}_{19}\text{H}_{21}\text{INaO}_4^+$  463.0377; found 463.0385.

#### Dimethyl (E)-3-(2-([1,1'-biphenyl]-4-yl)vinyl)-4-(iodomethyl)cyclopent-2-ene-1,1-dicarboxylate (4ab)

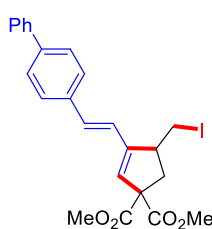

Yellow solid (49.3mg, 49% yield); m.p. 95-97 °C;  $R_f = 0.25$  (ethyl acetate/petroleum ether, 1:30);  $^1\text{H NMR}$  (400 MHz,  $\text{CDCl}_3$ ):  $\delta$  7.60 (t,  $J = 8.0$  Hz, 4H), 7.50 (d,  $J = 8.0$  Hz, 2H), 7.45 (t,  $J = 8.0$  Hz, 2H), 7.38-7.33 (m, 1H), 6.85 (d,  $J = 20.0$  Hz, 1H), 6.65 (d,  $J = 16.0$  Hz, 1H), 6.07 (s, 1H), 3.79 (s, 3H), 3.76 (s, 3H), 3.58 (dd,  $J = 12.0, 4.0$  Hz, 1H), 3.51 (t,  $J = 8.0$  Hz, 1H), 3.20 (t,  $J = 8.0$  Hz, 1H), 2.81 (q,  $J = 8.0$  Hz, 1H), 2.61 (dd,  $J = 12.0, 4.0$  Hz, 1H).  $^{13}\text{C NMR}$  (101 MHz,  $\text{CDCl}_3$ ):  $\delta$  171.1, 147.2, 141.0, 140.4, 135.4, 131.7, 128.8, 128.2, 127.5, 127.4, 127.1, 126.9, 122.3,

64.7, 53.0, 47.0, 38.7, 11.0. HRMS (ESI)  $m/z$ :  $[M+Na]^+$  calcd for  $C_{24}H_{23}INaO_4^+$  525.0533; found 525.0535.

**Dimethyl (E)-4-(iodomethyl)-3-(2-(naphthalen-2-yl)vinyl)cyclopent-2-ene-1,1-dicarboxylate (4ac)**

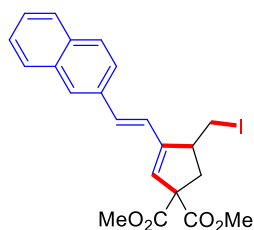

Yellow solid (53.6mg, 56% yield); m.p. 88-90 °C;  $R_f$  = 0.25 (ethyl acetate/petroleum ether, 1:30);  $^1H$  NMR (400 MHz,  $CDCl_3$ ):  $\delta$  7.83-7.79 (m, 4H), 7.62 (dd,  $J$  = 8.0 Hz, 1.6 Hz, 1H), 7.48-7.45 (m, 2H), 6.93 (d,  $J$  = 16.0 Hz, 1H), 6.78 (d,  $J$  = 16.0 Hz, 1H), 6.09 (s, 1H), 3.79 (s, 3H), 3.76 (s, 3H), 3.61 (dd,  $J$  = 12.0, 4.0 Hz, 1H), 3.58-3.51 (m, 1H), 3.22 (t,  $J$  = 8.0 Hz, 1H), 2.82 (q,  $J$  = 8.0 Hz, 1H), 2.62 (dd,  $J$  = 16.0, 4.0 Hz, 1H).  $^{13}C$  NMR (101 MHz,  $CDCl_3$ ):  $\delta$  171.1, 147.2, 133.9, 133.5, 133.3, 132.3, 128.4, 128.3, 128.1, 127.7, 127.2, 126.5, 126.3, 123.1, 122.6, 64.7, 53.0, 47.1, 38.7, 11.0. HRMS (ESI)  $m/z$ :  $[M+Na]^+$  calcd for  $C_{22}H_{21}INaO_4^+$  499.0377; found 499.0367.

**Dimethyl (E)-4-(iodomethyl)-3-(2-phenylprop-1-en-1-yl)cyclopent-2-ene-1,1-dicarboxylate (4ad)**

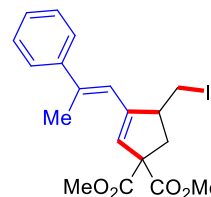

Yellow oil (44.3mg, 50% yield);  $R_f$  = 0.25 (ethyl acetate/petroleum ether, 1:30);  $^1H$  NMR (400 MHz,  $CDCl_3$ ):  $\delta$  7.44-7.41 (m, 2H), 7.37-7.33 (m, 2H), 7.30-7.28 (m, 1H), 6.08 (d,  $J$  = 4.0 Hz, 1H), 5.96 (s, 1H), 3.79 (s, 3H), 3.75 (s, 3H), 3.40 (dd,  $J$  = 12.0, 4.0 Hz, 1H), 3.24-3.21 (m, 1H), 3.17 (t,  $J$  = 8.0 Hz, 1H), 2.84 (dd,  $J$  = 16.0, 8.0 Hz, 1H), 2.30 (t,  $J$  = 8.0 Hz, 1H), 2.26 (d,  $J$  = 4.0 Hz, 3H).  $^{13}C$  NMR (101 MHz,  $CDCl_3$ ):  $\delta$  171.4, 171.2, 146.1, 143.2, 142.0, 128.4, 127.6, 127.3, 126.0, 120.0 (d,  $J$  = 6.1 Hz, 1C), 65.0, 53.0, 49.6, 38.2, 18.4, 11.9. HRMS (ESI)  $m/z$ :  $[M+H]^+$  calcd for  $C_{19}H_{22}IO_4^+$  441.0557; found 441.0549.

**Tetramethyl 3,3'-(1,4-phenylene)bis(4-(iodomethyl)cyclopent-2-ene-1,1-dicarboxylate) (4ae)**

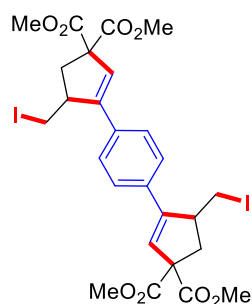

Yellow solid (78.3 mg, 54% yield); m.p. 64-66 °C;  $R_f$  = 0.25 (ethyl acetate/petroleum ether, 1:6);  $^1H$  NMR (400 MHz,  $CDCl_3$ ):  $\delta$  7.39 (s, 4H), 6.25 (d,  $J$  = 1.2 Hz, 2H), 3.80 (s, 6H), 3.74 (s, 6H), 3.68-3.61 (m, 2H), 3.42-3.37 (m, 2H), 3.13-3.07 (m, 2H), 2.93 (dd,  $J$  = 12.0, 8.0 Hz, 2H), 2.51 (dd,  $J$  = 12.0, 4.0 Hz, 2H).  $^{13}C$  NMR (101 MHz,  $CDCl_3$ ):  $\delta$  171.0 (d,  $J$  = 2.0 Hz, 1C), 148.1 (d,  $J$  = 4.0 Hz, 1C), 133.9 (d,  $J$  = 2.0 Hz, 1C), 127.0 (d,  $J$  = 1.0 Hz, 1C), 125.9, 64.8, 53.0 (d,  $J$  = 1.0 Hz, 1C), 47.3, 38.4, 11.1 (d,  $J$  = 2.0 Hz, 1C). HRMS (ESI)  $m/z$ :  $[M+Na]^+$  calcd for  $C_{26}H_{28}I_2NaO_8^+$  744.9766; found 744.9764.

**Dimethyl 3-(4-chlorophenyl)-4-(iodomethyl)-4-methylcyclopent-2-ene-1,1-dicarboxylate (4af)**

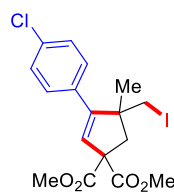

Yellow solid (60.8 mg, 68% yield); m.p. 83-85 °C;  $R_f = 0.25$  (ethyl acetate/petroleum ether, 1:15);  $^1\text{H NMR}$  (400 MHz,  $\text{CDCl}_3$ ):  $\delta$  7.32-7.29 (m, 2H), 7.27 (s, 1H), 7.25 (dd,  $J = 2.0, 1.6$  Hz, 1H), 5.91 (s, 1H), 3.79 (s, 3H), 3.77 (s, 3H), 3.28 (dd,  $J = 16.0, 8.0$  Hz, 2H), 2.77 (d,  $J = 12.0$  Hz, 1H), 2.52 (d,  $J = 16.0$  Hz, 1H), 1.42 (s, 3H).  $^{13}\text{C NMR}$  (101 MHz,  $\text{CDCl}_3$ ):  $\delta$  171.1, 171.0, 151.0, 134.1, 133.4, 129.4, 128.5, 127.5, 63.3, 53.1, 53.0, 51.4, 46.2, 26.8, 20.0. HRMS (ESI)  $m/z$ :  $[\text{M}+\text{H}]^+$  calcd for  $\text{C}_{17}\text{H}_{19}\text{ClIO}_4^+$  449.0011; found 449.0011.

#### Dimethyl 3-(4-chlorophenyl)-4-(2-iodopropan-2-yl)cyclopent-2-ene-1,1-dicarboxylate (4ag)

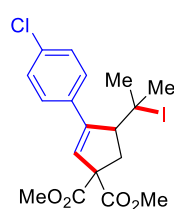

Yellow oil (48.2 mg, 52% yield);  $R_f = 0.25$  (ethyl acetate/petroleum ether, 1:30);  $^1\text{H NMR}$  (400 MHz,  $\text{CDCl}_3$ ):  $\delta$  7.29 (d,  $J = 8.0$  Hz, 2H), 7.18 (d,  $J = 12.0$  Hz, 2H), 5.91 (s, 1H), 3.76 (s, 6H), 3.73 (d,  $J = 4.0$  Hz, 1H), 3.26 (s, 2H), 1.76 (s, 3H), 1.31 (s, 3H).  $^{13}\text{C NMR}$  (101 MHz,  $\text{CDCl}_3$ ):  $\delta$  171.2, 148.3, 133.6, 131.7, 129.5, 128.1, 127.1, 62.8, 52.9, 39.2, 23.5, 21.7. HRMS (ESI)  $m/z$ :  $[\text{M}+\text{Na}]^+$  calcd for  $\text{C}_{18}\text{H}_{20}\text{ClINaO}_4^+$  484.9987; found 484.9977.

#### Dimethyl 3-(4-chlorophenyl)-4-(1-iodoethylidene)cyclopent-2-ene-1,1-dicarboxylate (4ah)

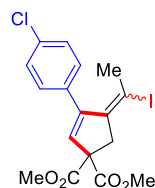

Yellow oil (61.0 mg, 66% yield);  $R_f = 0.25$  (ethyl acetate/petroleum ether, 1:30);  $^1\text{H NMR}$  (400 MHz,  $\text{CDCl}_3$ ):  $\delta$  7.30 (d,  $J = 8.0$  Hz, 2H), 7.15 (d,  $J = 8.0$  Hz, 2H), 6.22 (s, 1H), 3.77 (s, 6H), 3.41 (s, 2H), 2.62 (s, 3H).  $^{13}\text{C NMR}$  (101 MHz,  $\text{CDCl}_3$ ):  $\delta$  170.2, 148.8, 142.1, 137.0, 134.0, 133.4, 131.2, 128.0, 85.1, 62.4, 53.2 (d,  $J = 3.0$  Hz, 1C), 39.9, 34.0. HRMS (ESI)  $m/z$ :  $[\text{M}+\text{Na}]^+$  calcd for  $\text{C}_{27}\text{H}_{28}\text{INNaO}_4\text{S}_2^+$  468.9674; found 468.9665.

#### Diethyl 3-(4-chlorophenyl)-4-(iodomethylene)cyclopent-2-ene-1,1-dicarboxylate (4ai)

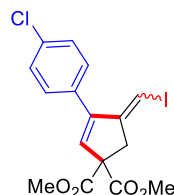

Yellow oil (52.8 mg, 61% yield);  $R_f = 0.25$  (ethyl acetate/petroleum ether, 1:30);  $^1\text{H NMR}$  (400 MHz,  $\text{CDCl}_3$ ):  $\delta$  7.36 (d,  $J = 8.0$  Hz, 2H), 7.27 (d,  $J = 8.0$  Hz, 1H), 6.39 (s, 1H), 6.24 (t,  $J = 4.0$  Hz, 1H), 3.80 (s, 6H), 3.32 (d,  $J = 4.0$  Hz, 2H).  $^{13}\text{C NMR}$  (101 MHz,  $\text{CDCl}_3$ ):  $\delta$  170.1, 152.6, 146.1, 134.3, 131.7, 129.6, 129.1, 128.8, 128.4, 73.4, 62.6, 53.3, 43.40. HRMS (ESI)  $m/z$ :  $[\text{M}+\text{Na}]^+$  calcd for  $\text{C}_{16}\text{H}_{14}\text{ClINaO}_4^+$  454.9518; found 454.9525.

#### Methyl 3-(4-chlorophenyl)-4-(iodomethyl)-1-(methylsulfonyl)cyclopent-2-ene-1-carboxylate (4aj)

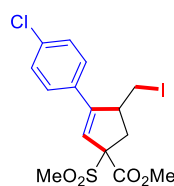

Yellow solid (65.4 mg, 72% yield); m.p. 108-110 °C;  $R_f = 0.25$  (ethyl acetate/petroleum ether, 1:3);  $^1\text{H NMR}$  (400 MHz,  $\text{CDCl}_3$ ):  $\delta$  7.36 (d,  $J = 8.0$  Hz, 2H), 7.31 (dd,  $J = 8.0, 4.0$  Hz, 2H), 6.16 (d,  $J = 4.0$  Hz, 1H), 3.90 (s, 3H), 3.69-3.63 (m, 1H), 3.39-3.36 (m, 1H), 3.15 (dd,  $J = 8.0, 4.0$  Hz, 1H), 3.05 (q,  $J = 8.0$  Hz, 4H), 2.62 (q,  $J = 8.0$  Hz, 1H).  $^{13}\text{C NMR}$  (101 MHz,  $\text{CDCl}_3$ ):  $\delta$  167.9, 154.1, 135.1, 131.8, 129.1,

128.1, 121.2, 82.9, 53.8, 46.2, 37.5, 35.2, 11.9. HRMS (ESI)  $m/z$ :  $[M+Na]^+$  calcd for  $C_{15}H_{16}ClINaO_4S^+$  476.9395; found 476.9392.

**Methyl 1-acetyl-3-(4-chlorophenyl)-4-(iodomethyl)cyclopent-2-ene-1-carboxylate (4ak)**

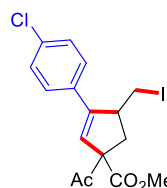

Yellow oil (45.1 mg, 54% yield);  $R_f$  = 0.25 (ethyl acetate/petroleum ether, 1:6);

$^1H$  NMR (400 MHz,  $CDCl_3$ ):  $\delta$  7.35-7.29 (m, 4H), 6.24 (dd,  $J$  = 8.0, 1.6 Hz, 1H), 3.77 (d,  $J$  = 24.0 Hz, 3H), 3.61-3.52 (m, 1H), 3.37-3.32 (m, 1H), 3.11-3.03 (m, 1H), 2.94-2.78 (m, 1H), 2.48-2.33 (m, 1H), 2.26 (d,  $J$  = 40.0 Hz, 3H).  $^{13}C$  NMR

(101 MHz,  $CDCl_3$ ):  $\delta$  202.6 (d,  $J$  = 9.1 Hz, 1C), 171.4 (d,  $J$  = 8.1 Hz, 1C), 148.1 (d,  $J$  = 7.1 Hz, 1C), 134.3, 132.3 (d,  $J$  = 8.0 Hz, 1C), 129.0, 127.9, 126.1 (d,  $J$  = 24.2 Hz, 1C), 71.7 (d,  $J$  = 8.1 Hz, 1C), 53.0, 47.1 (d,  $J$  = 27.3 Hz, 1C), 36.9 (d,  $J$  = 5.0 Hz, 1C), 26.8 (d,  $J$  = 68.7 Hz, 1C), 11.3 (d,  $J$  = 15.2 Hz, 1C). HRMS (ESI)  $m/z$ :  $[M+Na]^+$  calcd for  $C_{16}H_{16}ClINaO_3^+$  440.9725; found 440.9719.

**Methyl 3-(4-chlorophenyl)-4-(iodomethyl)-1-(phenylcarbamoyl)cyclopent-2-ene-1-carboxylate (4al)**

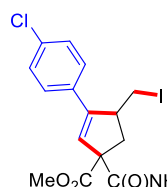

Yellow oil (68.7 mg, 69% yield);  $R_f$  = 0.25 (ethyl acetate/petroleum ether, 1:6);

$^1H$  NMR (400 MHz,  $CDCl_3$ ):  $\delta$  8.07 (d,  $J$  = 16.0 Hz, 1H), 7.57-7.49 (m, 2H), 7.36-7.29 (m, 6H), 7.16-7.09 (m, 1H), 6.30 (dd,  $J$  = 16.0, 1.6 Hz, 1H), 3.82 (d,  $J$  = 28.0 Hz, 3H), 3.66-3.55 (m, 1H), 3.41-3.36 (m, 1H), 3.33-3.17 (m, 1H), 3.14-2.95 (m, 1H), 2.75-2.47 (m, 1H).  $^{13}C$  NMR (101 MHz,  $CDCl_3$ ):  $\delta$  172.3 (d,  $J$  = 47.0 Hz, 1C), 167.5 (d,  $J$  = 8.0 Hz, 1C), 149.5, 148.5, 137.2 (d,  $J$  = 6.1 Hz, 1C), 134.5 (d,  $J$  = 9.1 Hz, 1C), 132.1,

128.9 (t,  $J$  = 2.0 Hz, 1C), 127.9 (d,  $J$  = 4.0 Hz, 1C), 126.2 (d,  $J$  = 4.0 Hz, 1C), 124.7 (d,  $J$  = 2.0 Hz, 1C), 119.9 (d,  $J$  = 11.1 Hz, 1C), 66.7 (d,  $J$  = 6.3 Hz, 1C), 53.3 (d,  $J$  = 11.1 Hz, 1C), 46.7 (d,  $J$  = 26.3 Hz, 1C), 38.3 (d,  $J$  = 11.1 Hz, 1C), 11.4. HRMS (ESI)  $m/z$ :  $[M+H]^+$  calcd for  $C_{21}H_{20}ClINO_3^+$  496.0171; found 496.0165.

**Methyl 1-(tert-butylcarbamoyl)-3-(4-chlorophenyl)-4-(iodomethyl)cyclopent-2-ene-1-carboxylate (4am)**

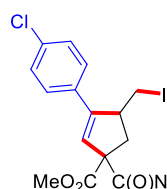

Yellow oil (39.2 mg, 41% yield);  $R_f$  = 0.25 (ethyl acetate/petroleum ether, 1:6);

$^1H$  NMR (400 MHz,  $CDCl_3$ ):  $\delta$  7.35-7.26 (m, 4H), 6.19 (dd,  $J$  = 20.0, 4.0 Hz, 1H), 6.14-6.04 (m, 1H), 3.77 (d,  $J$  = 24.0 Hz, 3H), 3.59-3.49 (m, 1H), 3.38-3.33 (m, 1H), 3.31-3.22 (m, 2H), 3.21-2.80 (m, 2H), 2.68-2.32 (m, 1H), 1.56-1.42 (m, 2H), 1.39-1.29 (m, 2H), 0.95-0.88 (m, 3H).  $^{13}C$  NMR (101 MHz,  $CDCl_3$ ):  $\delta$  172.3 (d,  $J$  = 33.3 Hz, 1C), 169.7 (d,  $J$  = 49.5 Hz, 1C), 148.2 (d,  $J$  = 80.8 Hz, 1C), 134.3, 132.3, 129.0, 127.9 (d,  $J$  = 8.1 Hz, 1C), 126.6, 65.8, 53.1, 47.0, 39.8, 38.4, 31.4, 19.9, 13.7, 11.4. HRMS (ESI)  $m/z$ :  $[M+Na]^+$  calcd for  $C_{19}H_{23}ClINNaO_3^+$  498.0303; found 498.0308.

### Diethyl 3-(4-chlorophenyl)-4-(iodomethyl)cyclopent-2-ene-1,1-dicarboxylate (4an)

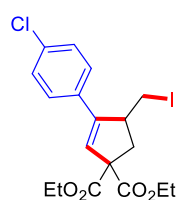

Yellow solid (49.9 mg, 54% yield); m.p. 95-97 °C;  $R_f = 0.25$  (ethyl acetate/petroleum ether, 1:30);  $^1\text{H NMR}$  (400 MHz,  $\text{CDCl}_3$ ):  $\delta$  7.32 (s, 4H), 6.22 (d,  $J = 1.6$  Hz, 1H), 4.29-4.15 (m, 4H), 3.64-3.58 (m, 1H), 3.36 (dd,  $J = 12.0, 8.0$  Hz, 1H), 3.09 (t,  $J = 8.0$  Hz, 1H), 2.89 (q,  $J = 8.0$  Hz, 1H), 2.51 (dd,  $J = 16.0, 4.0$  Hz, 1H), 1.30 (t,  $J = 8.0$  Hz, 3H), 1.25 (t,  $J = 8.0$  Hz, 3H).  $^{13}\text{C NMR}$  (101 MHz,  $\text{CDCl}_3$ ):  $\delta$  170.5, 147.5, 134.3, 132.4, 128.9, 127.9, 126.3, 65.0, 61.9, 47.4, 38.2, 14.1, (d,  $J = 6.1$  Hz, 1C), 11.0. HRMS (ESI)  $m/z$ :  $[\text{M}+\text{Na}]^+$  calcd for  $\text{C}_{18}\text{H}_{20}\text{ClINNaO}_4^+$  484.9987 found 484.9988.

### 1,1'-(3-(4-Chlorophenyl)-4-(iodomethyl)cyclopent-2-ene-1,1-diyl)bis(ethan-1-one) (4ao)

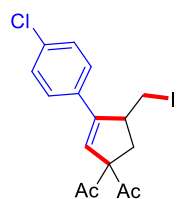

Yellow oil (27.5 mg, 35% yield);  $R_f = 0.25$  (ethyl acetate/petroleum ether, 1:9);  $^1\text{H NMR}$  (400 MHz,  $\text{CDCl}_3$ ):  $\delta$  7.35 (d,  $J = 8.0$  Hz, 2H), 7.30 (d,  $J = 8.0$  Hz, 2H), 6.36 (d,  $J = 1.6$  Hz, 1H), 3.51-3.45 (m, 1H), 3.34 (dd,  $J = 12.0, 4.0$  Hz, 1H), 3.06 (dd,  $J = 10.1, 8.0$  Hz, 1H), 2.86 (dd,  $J = 12.0, 8.0$  Hz, 1H), 2.37 (dd,  $J = 12.0, 8.0$  Hz), 2.27 (s, 3H), 2.16 (s, 3H).  $^{13}\text{C NMR}$  (101 MHz,  $\text{CDCl}_3$ ):  $\delta$  204.7, 203.8, 148.5, 134.4, 132.4, 129.0, 127.8, 126.2, 79.6, 46.5, 35.8, 27.5, 26.8, 11.7. HRMS (ESI)  $m/z$ :  $[\text{M}+\text{Na}]^+$  calcd for  $\text{C}_{16}\text{H}_{16}\text{ClINNaO}_2^+$  424.9776; not found (Confirmed by GC-MS).

### 3-(4-Chlorophenyl)-4-(iodomethyl)cyclopent-2-ene-1,1-dicarbonitrile (4ap)

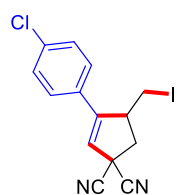

Yellow oil (21.3 mg, 45% yield);  $R_f = 0.25$  (ethyl acetate/petroleum ether, 1:9);  $^1\text{H NMR}$  (400 MHz,  $\text{CDCl}_3$ ):  $\delta$  7.42 (d,  $J = 8.0$  Hz, 2H), 7.32 (d,  $J = 8.0$  Hz, 2H), 6.02 (d,  $J = 2.4$  Hz, 1H), 3.79-3.73 (m, 1H), 3.34 (q,  $J = 4.0$  Hz, 1H), 3.21-3.08 (m, 2H), 2.81 (dd,  $J = 16.0, 4.0$  Hz, 1H).  $^{13}\text{C NMR}$  (101 MHz,  $\text{CDCl}_3$ ):  $\delta$  152.8, 136.2, 130.0, 129.5, 128.2, 119.5, 114.8 (d,  $J = 15.2$ , 1C), 47.0, 43.1, 37.4, 8.0. HRMS (ESI)  $m/z$ : calcd 367.9577; not found (Confirmed by GC-MS).

### Dimethyl 3-(4-chlorophenyl)-4-iodo-3a,4,5,6,7,7a-hexahydro-1H-indene-1,1-dicarboxylate (4aq)

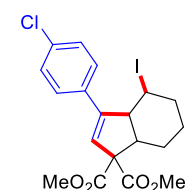

Yellow oil (39.4mg, 42% yield);  $R_f = 0.25$  (ethyl acetate/petroleum ether, 1:30);  $^1\text{H NMR}$  (400 MHz,  $\text{CDCl}_3$ ):  $\delta$  7.36-7.34 (m, 2H), 7.24 (d,  $J = 8.0$  Hz, 2H), 5.97 (d,  $J = 4.0$  Hz, 1H), 4.93 (d,  $J = 4.0$  Hz, 1H), 3.99 (t,  $J = 4.0$  Hz, 1H), 3.77 (s, 3H), 3.68 (s, 3H), 3.57-3.52 (m, 1H), 1.88-1.78 (m, 2H), 1.57-1.42 (m, 3H), 1.18-1.10 (m, 1H).  $^{13}\text{C NMR}$  (101 MHz,  $\text{CDCl}_3$ ):  $\delta$  170.0, 168.9, 148.2, 134.1, 133.5, 128.9, 128.1, 127.0, 67.5, 54.0, 52.7, 52.5, 42.2, 32.9, 31.4, 23.7, 21.2. HRMS (ESI)  $m/z$ :  $[\text{M}+\text{Na}]^+$  calcd for  $\text{C}_{19}\text{H}_{20}\text{ClINaO}_4^+$  496.9987; found 496.9984.

### 2-(4-Chlorophenyl)-3-(iodomethyl)-8,8-dimethyl-7,9-dioxaspiro[4.5]dec-1-ene-6,10-dione (4ar)

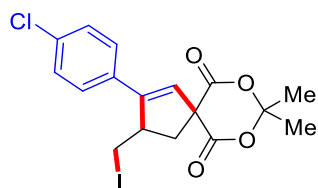

Yellow solid (40.2mg, 45% yield); m.p. 141-143 °C;  $R_f = 0.25$  (ethyl acetate/petroleum ether, 1:6);  $^1\text{H NMR}$  (400 MHz,  $\text{CDCl}_3$ ):  $\delta$  7.37-7.31 (m, 4H), 5.93 (d,  $J = 4.0$  Hz, 1H), 3.96-3.89 (m, 1H), 3.41 (dd,  $J = 12.0, 4.0$  Hz, 1H), 3.24 (t,  $J = 12.0$  Hz, 1H), 2.99 (q,  $J = 8.0$  Hz, 1H), 2.61 (dd,  $J = 16.0, 4.0$  Hz, 1H), 1.81 (d,  $J = 4.0$  Hz, 6H).  $^{13}\text{C NMR}$  (101 MHz,  $\text{CDCl}_3$ ):  $\delta$  169.1, 168.8, 151.3, 134.9, 131.4, 128.5 (d,  $J = 4.0$  Hz, 1C), 129.1, 128.1, 124.4, 105.4, 58.9, 49.0, 43.0, 29.3, 28.8, 9.5. HRMS (ESI)  $m/z$ :  $[\text{M}+\text{Na}]^+$  calcd for  $\text{C}_{17}\text{H}_{16}\text{ClINaO}_4^+$  468.9674; not found.

## 8. Procedure for the scale-up reaction

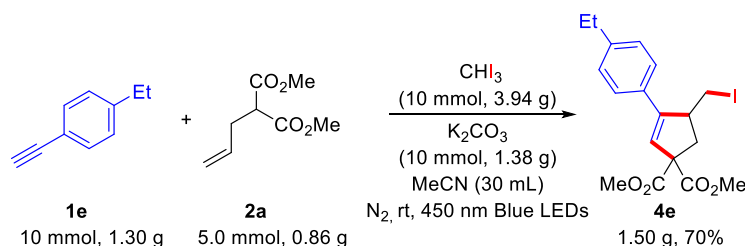

1-Ethyl-4-ethynylbenzene **1e** (2.0 equiv, 10.0 mmol, 1.30 g), dimethyl allylmalonate **2a** (8.0 mol, 0.86 g),  $\text{CHI}_3$  (2.0 equiv, 10 mmol, 3.94 g),  $\text{K}_2\text{CO}_3$  (2.0 equiv, 10.0 mmol, 1.38 g) and a stir bar were added to a sealed tube under nitrogen atmosphere, MeCN (30.0 mL) as solvent was then added, and the reaction mixture was stirred under a 450 nm blue LEDs irradiation for 12 h at room temperature. After **2a** was completely consumed (monitored by TLC), the crude mixture was directly purified by flash column chromatography on silica gel (ethyl acetate/petroleum ether = 1:30) to give the desired product **4e** as yellow oil (1.50 g, 70% yield).

## 9. Product derivation.

### 9.1) Intramolecular annulation<sup>7</sup>

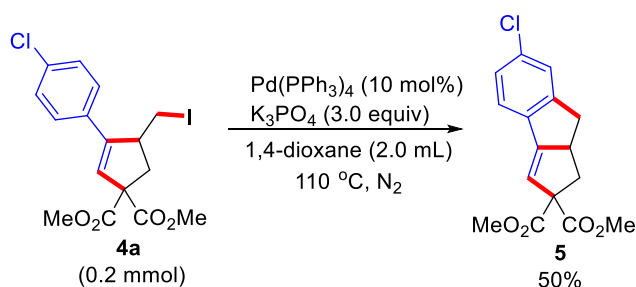

Compound **4a** (0.2 mmol, 86.9 mg, 1.0 equiv),  $\text{Pd(PPh}_3)_4$  (10 mol%, 23.1 mg),  $\text{K}_3\text{PO}_4$  (0.6 mmol, 127.4 mg, 3.0 equiv) and a stir bar were added to a sealed tube in nitrogen atmosphere, then 1,4-dioxane (2.0 mL) were added. The reaction heated to 110 °C and stirred for 24 hours. After **4a** was completely consumed (monitored by TLC), the reaction mixture was allowed to cool down to room temperature, was then quenched with 1.0 mL 1M HCl and extracted with 2.0 mL  $\text{CH}_2\text{Cl}_2$ . The organic layer was dried over  $\text{Na}_2\text{SO}_4$ , concentrated and purified by flash column chromatography

on silica gel (ethyl acetate/petroleum ether = 1:40) to give the desired product **5** as colorless oil (38.3 mg, 50% yield). <sup>1</sup>H NMR (400 MHz, CDCl<sub>3</sub>): δ 7.34 (d, *J* = 4.0 Hz, 3H), 6.21 (s, 1H), 5.09 (d, *J* = 4.0 Hz, 1H), 5.03 (t, *J* = 4.0 Hz, 1H), 3.77 (s, 6H), 3.74 (t, *J* = 4.0 Hz, 1H), 3.35 (t, *J* = 0.2 Hz, 2H). <sup>13</sup>C NMR (101 MHz, CDCl<sub>3</sub>): δ 170.7, 148.6, 147.5, 134.1, 132.4, 129.6, 128.6, 128.1, 106.7, 63.5, 53.0 (d, *J* = 5.0 Hz, 1C), 39.6 (d, *J* = 71.7 Hz, 1C), 38.8, 20.1. HRMS (ESI) *m/z*: [M+Na]<sup>+</sup> calcd for C<sub>16</sub>H<sub>15</sub>ClNaO<sub>4</sub><sup>+</sup> 329.0551; found 329.0547.

## 9.2) Reduction and spiro-cyclization<sup>8,9</sup>

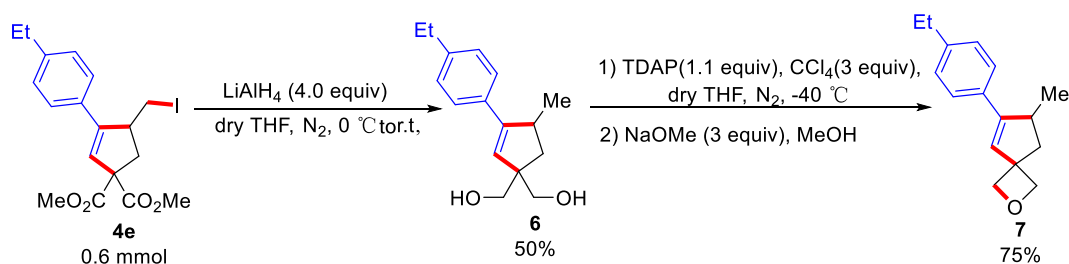

Compound **4e** (1.0 equiv, 0.6 mmol, 257.0 mg) was added to LiAlH<sub>4</sub> (4.0 equiv, 2.4 mmol, 91.1 mg) in THF (5.0 mL) at 0 °C within 30 min, and the reaction mixture was stirred at room temperature for 90 min, then EtOAc (2 mL) was added in 0 °C and the mixture was poured into 1.0 mL 1M HCl. The mixture was extracted with EtOAc, dried over Na<sub>2</sub>SO<sub>4</sub>, concentrated and purified by flash column chromatography on silica gel to obtain **6** (74.0 mg, 50%, white solid). <sup>1</sup>H NMR (400 MHz, CDCl<sub>3</sub>): δ 7.32 (d, *J* = 8.0 Hz, 2H), 7.16 (d, *J* = 8.0 Hz, 2H), 5.84 (d, *J* = 1.2 Hz, 1H), 3.74 (s, 2H), 3.66 (s, 2H), 3.38-3.30 (m, 1H), 2.65 (t, *J* = 8.0 Hz, 2H), 2.61-2.55 (m, 2H), 2.19 (dd, *J* = 12.0, 8.0 Hz, 1H), 1.49 (dd, *J* = 12.0, 4.0 Hz, 1H), 1.23 (t, *J* = 8.0 Hz, 3H), 1.14 (d, *J* = 8.0 Hz, 3H). <sup>13</sup>C NMR (101 MHz, CDCl<sub>3</sub>): δ 150.5, 143.6, 133.1, 127.9, 126.4, 126.1, 69.9, 69.3, 55.2, 38.9, 38.2, 28.6, 21.6, 15.5. HRMS (ESI) *m/z*: [M+Na]<sup>+</sup> calcd for C<sub>16</sub>H<sub>22</sub>NaO<sub>2</sub><sup>+</sup> 269.1512; found 269.1497.

A mixture of **6** (1.0 equiv, 0.3 mmol, 74.0 mg) and CCl<sub>4</sub> (3.0 equiv, 0.9 mmol, 138.4 mg) in THF (3.0 mL) cooled to -40 °C, the solution of N, N, N', N', N'', N''-hexamethylphosphinetriamine (TDAP, 1.1 equiv, 0.33 mmol, 53.9 mg) in THF (2.0 mL) are added over three hours under a nitrogen atmosphere. Then the reaction mixture was stirred at room temperature for one hour, and then concentrated under vacuum. The solution of above mixture in the methanol is added to the sodium (3.0 equiv, 0.9 mmol, 20.7 mg) solution within 5 minutes, and after refluxing for one hour, the sodium chloride is filtered. Then the solution was concentrated in vacuum and purified by flash column chromatography on silica gel (ethyl acetate/petroleum ether = 30:1) to obtain **7** (Clear colorless liquid, 75%, 51.4 mg). <sup>1</sup>H NMR (400 MHz, CDCl<sub>3</sub>): δ 7.34 (d, *J* = 8.0 Hz, 2H), 7.17 (d, *J* = 8.0 Hz, 2H), 6.24 (s, 1H), 4.77 (q, *J* = 4.0 Hz, 2H), 4.71 (d, *J* = 8.0 Hz, 1H), 4.66 (d, *J* = 4.0 Hz, 1H), 3.26-3.18 (m, 1H), 2.64 (dd, *J* = 12.0, 8.0 Hz, 2H), 2.54 (dd, *J* = 12.0, 8.0 Hz, 1H), 2.05 (dd, *J* = 12.0, 4.0 Hz, 1H), 1.24 (t, *J* = 8.0 Hz, 3H), 1.06 (d, *J* = 8.0 Hz, 3H). <sup>13</sup>C NMR (101 MHz, CDCl<sub>3</sub>):



$\delta$  149.1, 143.7, 132.6, 128.2, 127.9, 126.3, 83.9, 83.3, 51.6, 45.4, 39.2, 28.6, 21.2, 15.5. HRMS (ESI)  $m/z$ :  $[M+H]^+$  calcd for  $C_{16}H_{21}O^+$  229.1587; found 229.1578.

### 9.3) Elimination of hydroiodic acid<sup>4</sup>

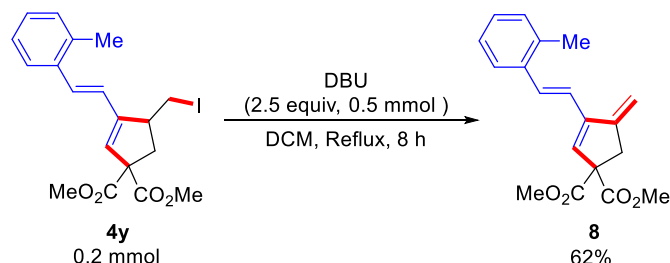

Compound **4y** (0.2 mmol, 88.0 mg, 1.0 equiv), DBU (0.5 mmol, 76.6 mg, 2.5 equiv), DCM (2.0 mL) and a stir bar were added to a 10 mL sealed tube in nitrogen atmosphere. The solution was refluxed for 8 h. Then the solution was concentrated in vacuum and purified by flash column chromatography on silica gel (ethyl acetate/petroleum ether =30:1) to obtain **8** (38.7 mg, 62%). <sup>1</sup>H NMR (400 MHz, CDCl<sub>3</sub>):  $\delta$  7.54-7.50 (m, 1H), 7.26 (t,  $J$  = 8.0 Hz, 1H), 7.21-7.16 (m, 3H), 6.65 (d,  $J$  = 16.0 Hz, 1H), 6.32 (s, 1H), 5.24 (t,  $J$  = 4.0 Hz, 1H), 5.07 (d,  $J$  = 1.2 Hz, 1H), 3.78 (s, 6H), 3.30 (t,  $J$  = 4.0 Hz, 2H), 2.39 (s, 3H). <sup>13</sup>C NMR (101 MHz, CDCl<sub>3</sub>):  $\delta$  170.9, 148.7, 144.5, 136.0 (d,  $J$  = 4.0 Hz, 1C), 131.2, 130.4, 130.1 (d,  $J$  = 8.1 Hz, 1C), 128.0, 126.2, 125.6, 120.8, 105.0, 63.3, 53.0 (d,  $J$  = 6.1 Hz, 1C), 38.9, 19.9. HRMS (ESI)  $m/z$ :  $[M+Na]^+$  calcd for  $C_{19}H_{20}NaO_4^+$  335.1254; found 335.1260.

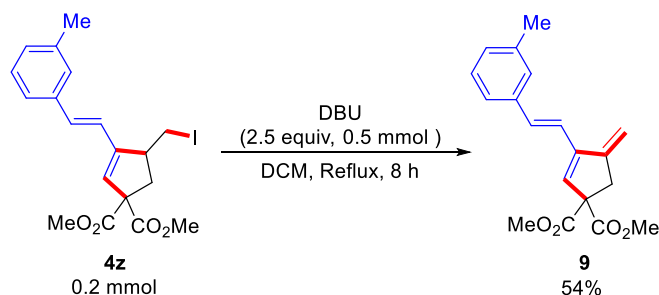

Compound **4z** (0.2 mmol, 88.0 mg, 1.0 equiv), DBU (0.5 mmol, 76.6 mg, 2.5 equiv), DCM (2.0 mL) and a stir bar were added to a 10 mL sealed tube in nitrogen atmosphere. The solution was refluxed for 8 h. Then the solution was concentrated in vacuum and purified by flash column chromatography on silica gel (ethyl acetate/petroleum ether =30:1) to obtain **9** (33.7 mg, 54%). <sup>1</sup>H NMR (400 MHz, CDCl<sub>3</sub>):  $\delta$  7.27 (s, 1H), 7.23 (t,  $J$  = 8.0 Hz, 2H), 7.09 (d,  $J$  = 8.0 Hz, 1H), 7.02 (d,  $J$  = 16.0 Hz, 1H), 6.74 (d,  $J$  = 16.0 Hz, 1H), 6.32 (s, 1H), 5.23 (t,  $J$  = 4.0 Hz, 1H), 5.06 (dd,  $J$  = 4.0, 0.4 Hz, 1H), 3.77 (s, 6H), 3.28 (t,  $J$  = 4.0 Hz, 2H), 2.36 (s, 3H). <sup>13</sup>C NMR (101 MHz, CDCl<sub>3</sub>):  $\delta$  170.9, 148.7, 144.3, 138.2, 136.8, 133.5, 129.9 (d,  $J$  = 7.1 Hz, 1C), 129.0, 128.6, 127.3, 123.8, 119.1, 104.9, 63.3, 53.0 (d,  $J$  = 5.0 Hz, 1C), 38.8, 21.4. HRMS (ESI)  $m/z$ :  $[M+Na]^+$  calcd for  $C_{19}H_{20}NaO_4^+$  335.1254; found 335.1259.

## 10. Control experiments and Reaction mechanism proposed

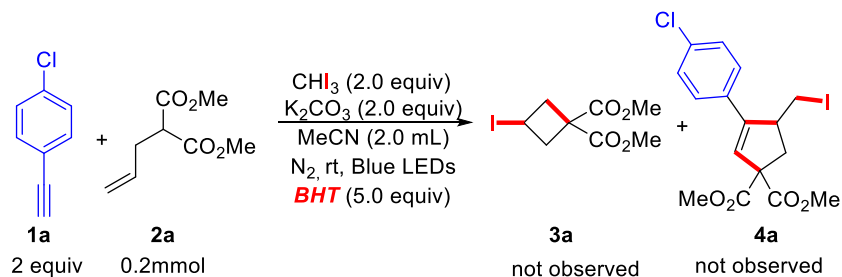

### Mechanism proposed for the radical iodoalkylative cyclization

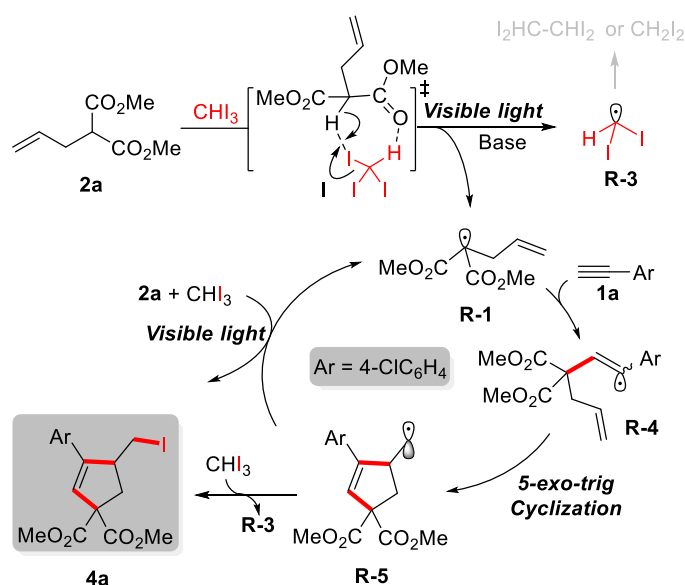

## 11. Reaction thermally under dark condition

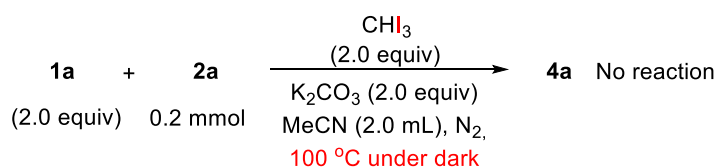

**1a** (54.6 mg, 2.0 equiv), **2a** (34.8 mg, 0.2 mmol),  $\text{CHI}_3$  (157.5 mg, 2.0 equiv),  $\text{K}_2\text{CO}_3$  (55.3 mg, 2.0 equiv) and a stir bar were added to a sealed tube under a nitrogen atmosphere in 100 °C oil bath under dark. MeCN (2.0 mL) as solvent was then added. The mixture was stirred for 12 h at room temperature, and no reaction was observed.

## 12. Light on-off experiment

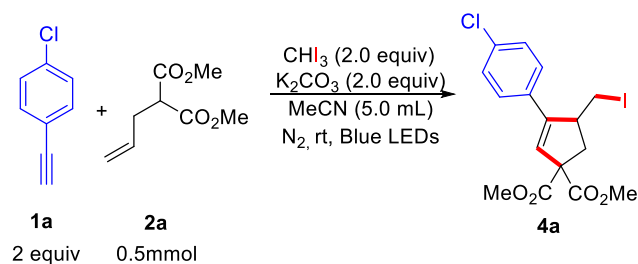

**1a** (273.0 mg, 2.0 equiv), **2a** (86.1 mg, 0.5 mmol),  $\text{CHI}_3$  (393.8 mg, 2.0 equiv),  $\text{K}_2\text{CO}_3$  (138.3 mg, 2.0 equiv), MeCN (5.0 mL) and a stir bar was added to a 10 mL sealed tube. Firstly, the mixture was irradiated by a 450 nm blue LEDs for 3 h under  $\text{N}_2$  atmosphere. 0.5 mL reaction mixture was taken out from the reaction system under  $\text{N}_2$  atmosphere for  $^1\text{H}$  NMR analysis. The remaining mixture was stirred in the absence of light for an additional 1 h. Then another 0.5 mL reaction mixture was taken out from the reaction system under  $\text{N}_2$  atmosphere for  $^1\text{H}$  NMR analysis. Secondly, the blue LEDs were turned back on to irradiate the remaining mixture. After an additional 4 h of irradiation, the lamps were turned off and 0.5 mL reaction mixture was taken out from the reaction system for  $^1\text{H}$  NMR analysis. The remaining mixture was stirred in the absence of light for an additional 1 h. Then another 0.5 mL reaction mixture was taken out from the reaction system  $^1\text{H}$  NMR analysis. Finally, the LEDs were turned back on to irradiate the remaining mixture, and after an additional 5 h of irradiation, the lamps were turned off and 0.5 mL reaction mixture was taken out from the reaction system for  $^1\text{H}$  NMR analysis. The remaining mixture was stirred in the absence of light for an additional 1 h. Then another 0.5 mL reaction mixture was taken out from the reaction system  $^1\text{H}$  NMR analysis.

| Time/hours           | 3  | 4  | 8  | 9  | 14  | 15  |
|----------------------|----|----|----|----|-----|-----|
| Conversion of 2a (%) | 33 | 33 | 69 | 69 | 100 | 100 |

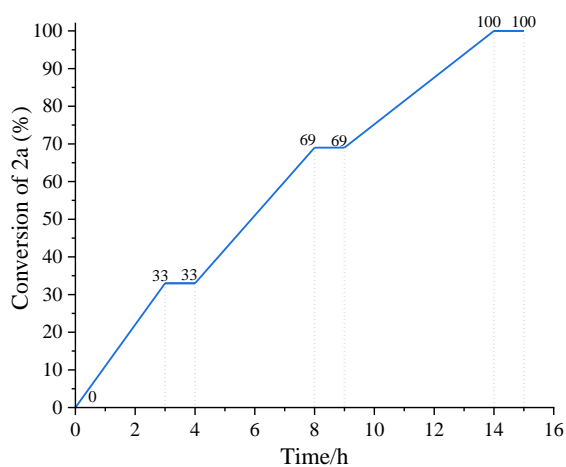

Figure S1: Light on-off experiment  
S18

### 13. The UV-Visible absorption spectroscopy experiment

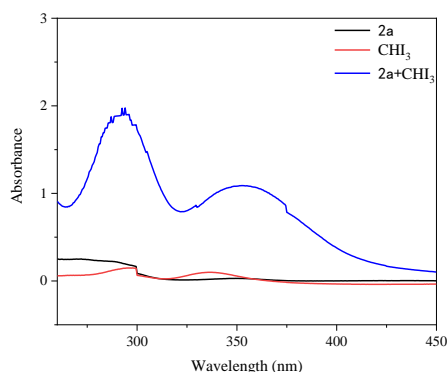

Figure S2: UV-Vis absorption spectroscopy of **2a**, CHI<sub>3</sub> and their mixture

The UV-Vis spectroscopy experiment was carried out using the 0.1 M dimethyl allyl malonate **2a** solution of MeCN solvent; 0.001 M CHI<sub>3</sub> solution of MeCN solvent as the sample, respectively. As the results shown in Fig S1, the maximum absorption wavelength of the malonate ester and CHI<sub>3</sub> were both recorded in the UV spectral region, while the malonate ester and CHI<sub>3</sub> were mixed together (1:1 v/v) and under the visible-light irradiation for five minutes, a significant red shift for the absorption spectroscopy of reaction components were observed.

### 14. X-ray Structure of product

Single crystal of **4a** was obtained by recrystallization from dichloromethane/n-hexane solution. The crystal structure was determined by standard crystallographic methods. A colorless block-shaped crystal (mm<sup>3</sup>) was used for single-crystal X-ray diffraction. The data were collected at 273.15 K using a Bruker D8 QUEST X-ray diffractometer with graphite-monochromated Mo-K $\alpha$  radiation ( $\lambda = 0.71073 \text{ \AA}$ ). The structure was solved by Direct Methods and refined by full-matrix least-squares techniques on F<sup>2</sup> with anisotropic displacement parameters for all atoms using SHELX-2014. All the processes were performed within Olex2. The final refinements included anisotropic displacements parameters for all atoms and a secondary extinction correction. The crystallographic parameter data is listed in **Table S1**.

**Figure S1.** Crystal Structure of **4a** with thermal ellipsoids drawn at the 30% probability level. Hydrogens are omitted for clarity and Crystallographic data for **4a** have been deposited with the Cambridge Crystallographic Data Center as CCDC: **2208470**. And the crystal data and details of the data collection are given in **Table S1**

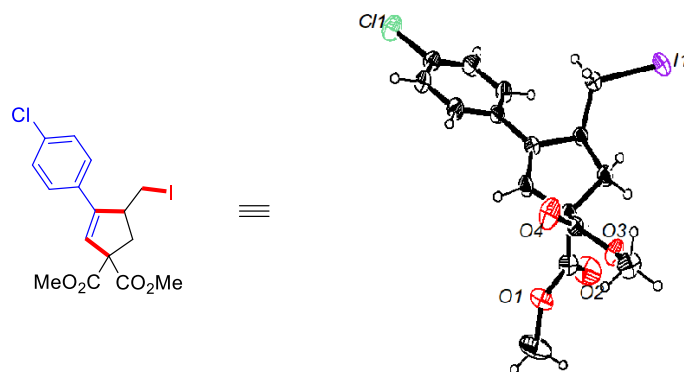

Figure S1: Crystal structure of **4a**

**Table S1.** Crystal data of **4a**

|                                             |                                                               |                                                                                        |
|---------------------------------------------|---------------------------------------------------------------|----------------------------------------------------------------------------------------|
| Empirical formula                           | $C_{16}H_{16}ClIO_4$                                          |                                                                                        |
| CCDC                                        | 2208470                                                       |                                                                                        |
| Formula weight                              | 434.64                                                        |                                                                                        |
| Temperature(K)                              | 273.15                                                        |                                                                                        |
| Wavelength(Å)                               | 0.71073                                                       |                                                                                        |
| Crystal system                              | triclinic                                                     |                                                                                        |
| space group                                 | P-1                                                           |                                                                                        |
| Unit cell dimensions                        | a = 8.2223(3) Å<br>b = 10.3432(5) Å<br>c = 11.0230(6) Å       | $\alpha = 93.878(2)^\circ$<br>$\beta = 97.956(2)^\circ$<br>$\gamma = 110.091(4)^\circ$ |
| Volume(Å <sup>3</sup> )                     | 865.22(7)                                                     |                                                                                        |
| Z                                           | 2                                                             |                                                                                        |
| Calculated density(g·cm <sup>-3</sup> )     | 1.392                                                         |                                                                                        |
| Absorption coefficient(mm <sup>-1</sup> )   | 1.251                                                         |                                                                                        |
| F(000)                                      | 2512.0                                                        |                                                                                        |
| Crystal size(mm)                            | 0.12 × 0.11 × 0.1                                             |                                                                                        |
| $\theta$ range for data collection          | 3.658 to 55.046                                               |                                                                                        |
| <i>h, k, l</i> ranges                       | -31 ≤ <i>h</i> ≤ 32, -13 ≤ <i>k</i> ≤ 16, -25 ≤ <i>l</i> ≤ 27 |                                                                                        |
| Reflections collected                       | 29006                                                         |                                                                                        |
| Independent reflections                     | 6792 [R(int) = 0.0453]                                        |                                                                                        |
| Completeness                                | 99%                                                           |                                                                                        |
| Absorption correction                       | Multi-scan                                                    |                                                                                        |
| Data / restraints / parameters              | 6792/42/319                                                   |                                                                                        |
| Goodness-of-fit on $F^2$                    | 1.066                                                         |                                                                                        |
| Final <i>R</i> indices [ $I > 2\sigma(I)$ ] | $R_1 = 0.0608$ , $wR_2 = 0.1731$                              |                                                                                        |
| <i>R</i> indices (all data)                 | $R_1 = 0.1020$ , $wR_2 = 0.1960$                              |                                                                                        |
| Largest diff. peak and hole                 | 1.16 and -0.76 e·Å <sup>-3</sup>                              |                                                                                        |

## 15. References

- [1] H. Park, Y. Hong, Y. B. Kim, T. Choi, *Org. Lett.* **2010**, *12*, 3442.
- [2] H. Feng, Y. Wang, J. Chen, L. Zhou. *Adv. Synth. Catal.* **2015**, *357*, 940.
- [3] B. Yu, S. Mohamed, J. Ardisson, *Chem. Commun.* **2022**, *58*, 1374.
- [4] Z. Guan, S. Zhu, Y. Ye, X. Li, Y. Liu, P. Wang, H. Zhang, Z. Huang, A. Lei, *Angew. Chem. Int. Ed.* **2022**, *134*, e202207059.
- [5] W. Yang, L. Huang, H. Liu, W. Wang, H. Li, *Chem. Commun.* **2013**, *49*, 4667.
- [6] M. Giel, A. S. Barrow, C.J. Smedley, W. Lewis, J. E. Moses, *Chem. Commun.* **2021**, *57*, 6991.
- [7] A. R. O. Venning, P. T. Bohan, E. J. Alexanian, *J. Am. Chem. Soc.* **2015**, *137*, 3731.
- [8] Y. Wang, Y. Yuan, Z. Wang, Y. Gu, S. Fu, L. Kong, Y. Li, *Org. Lett.* **2021**, *23*, 5911.
- [9] B. Castro, C. Selve, *Tetrahedron Lett.* **1973**, 4459.

### 16. $^1\text{H}$ , $^{13}\text{C}$ and $^{19}\text{F}$ NMR spectra

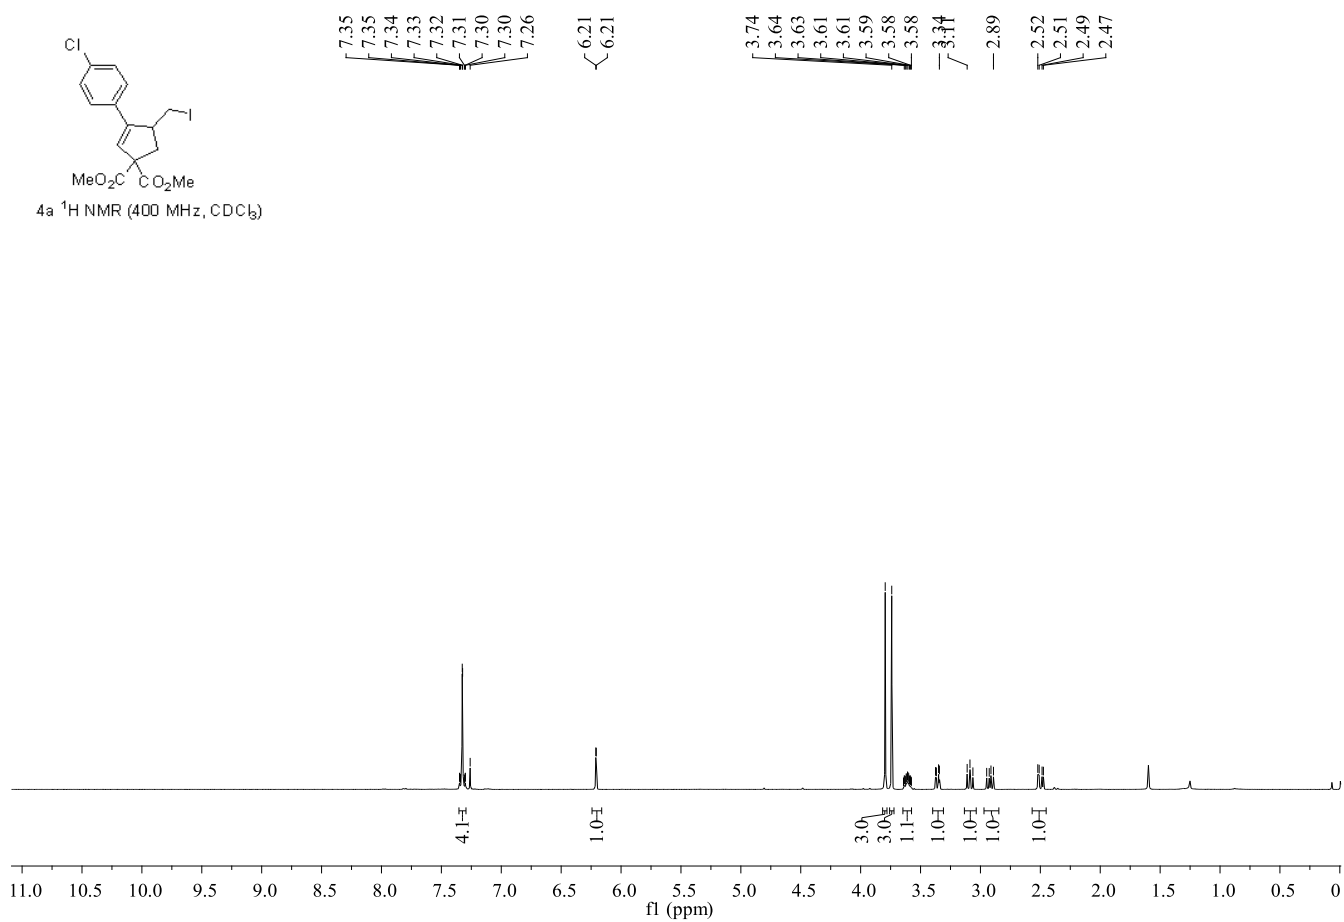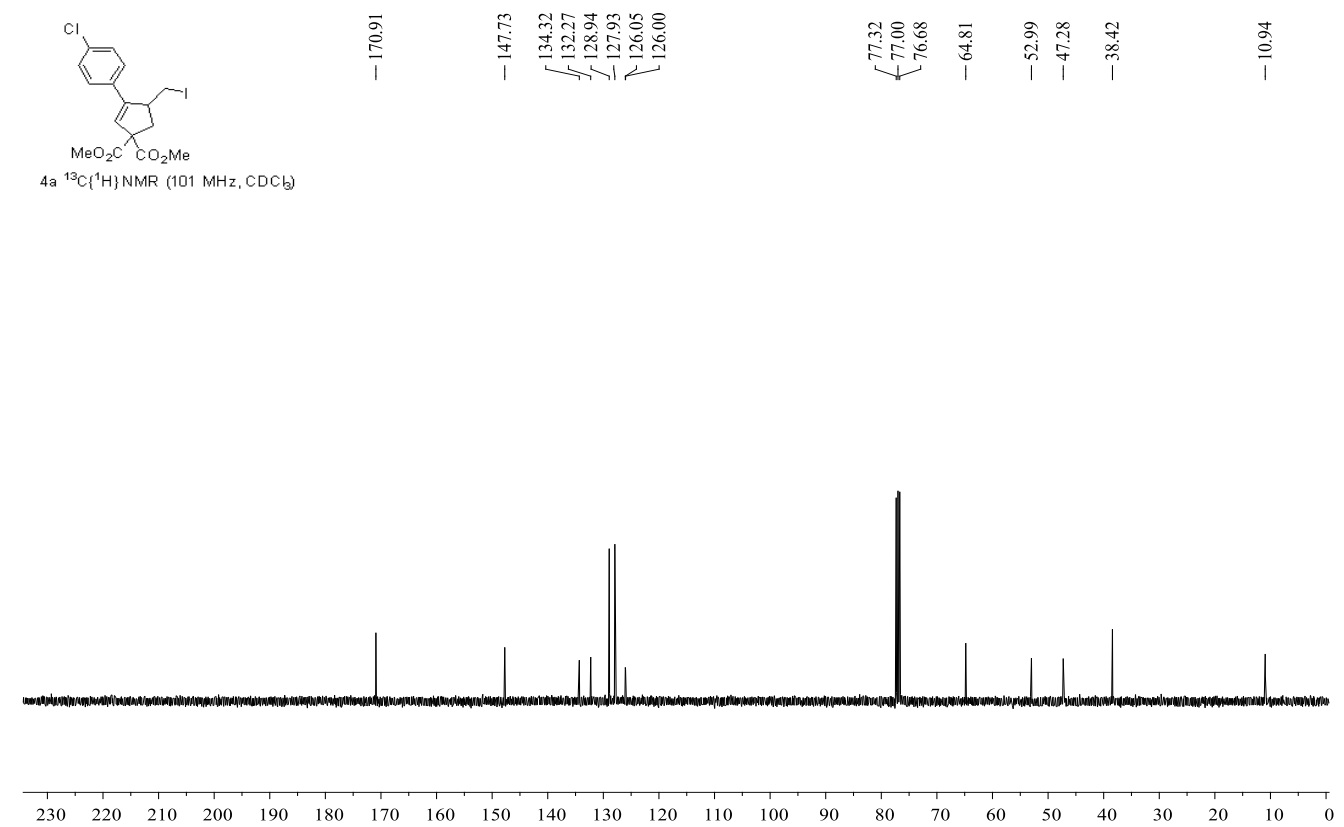



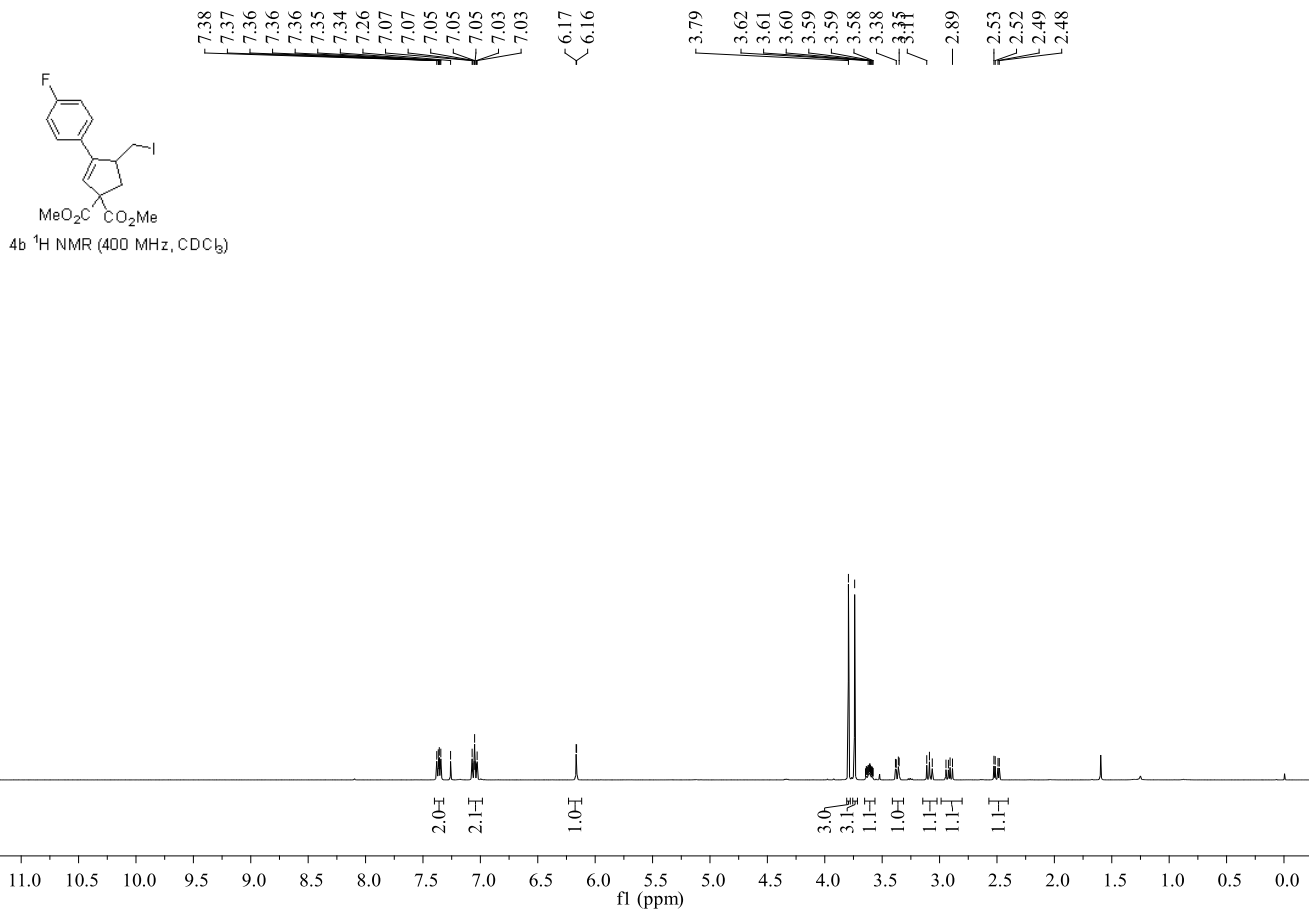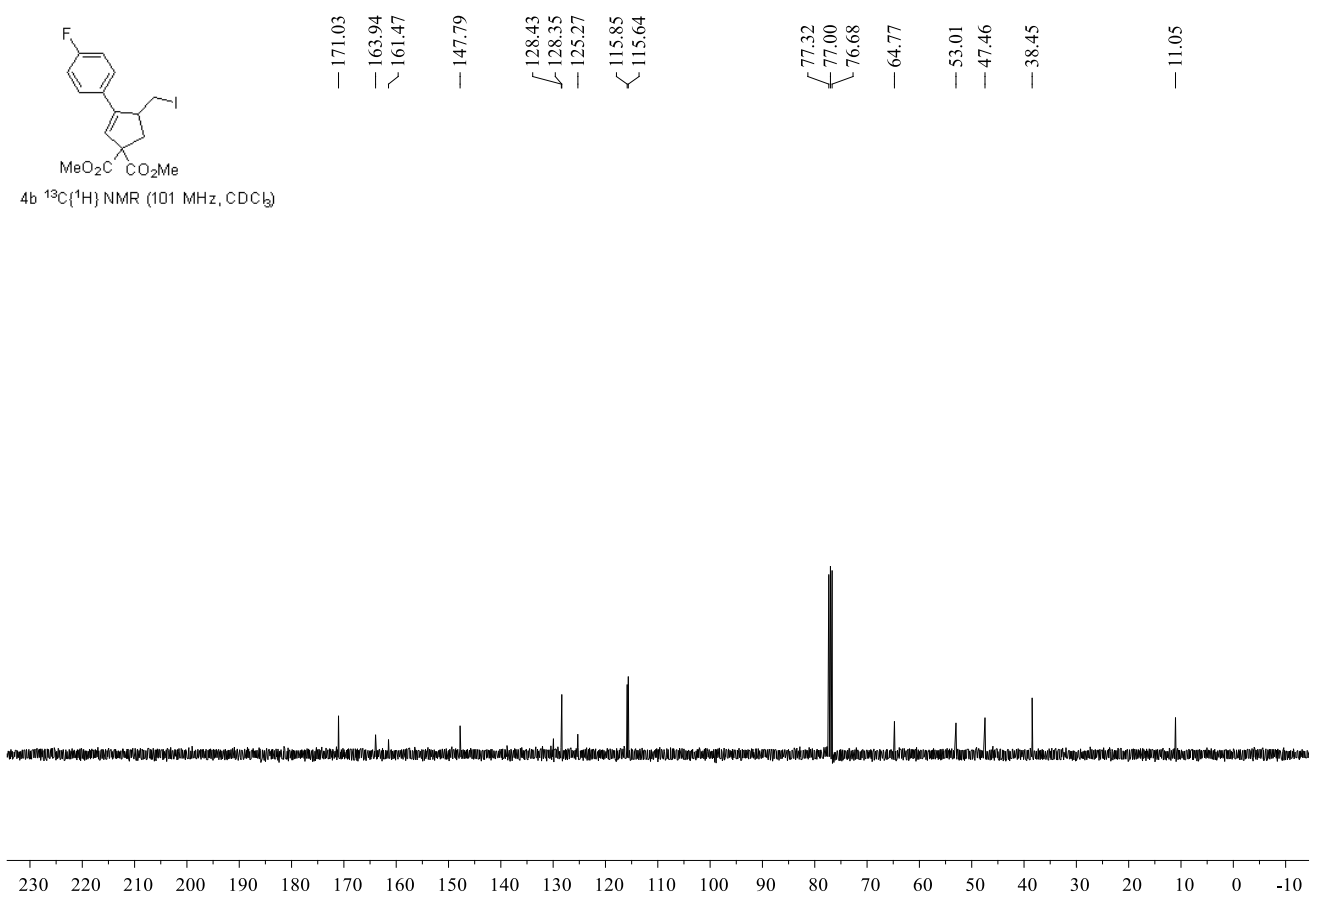

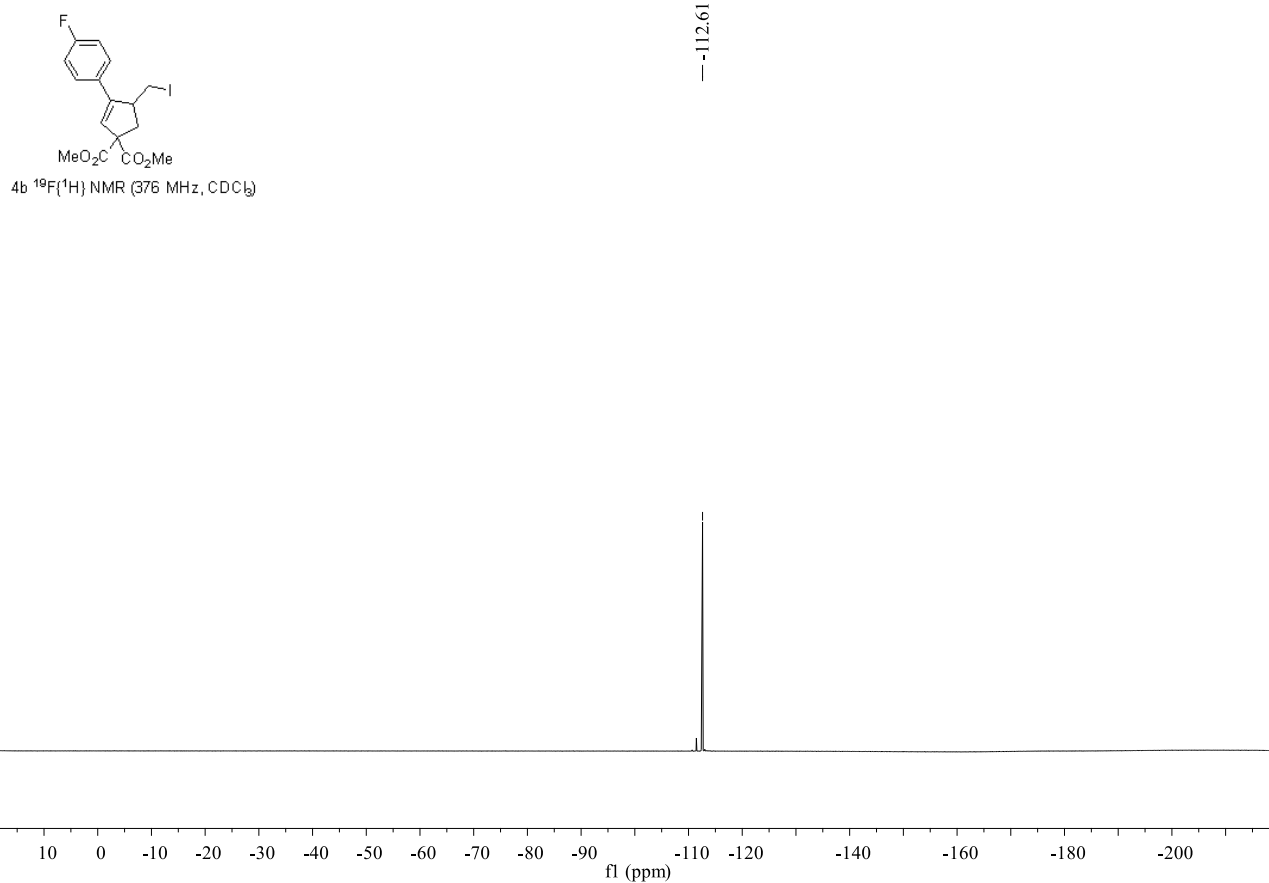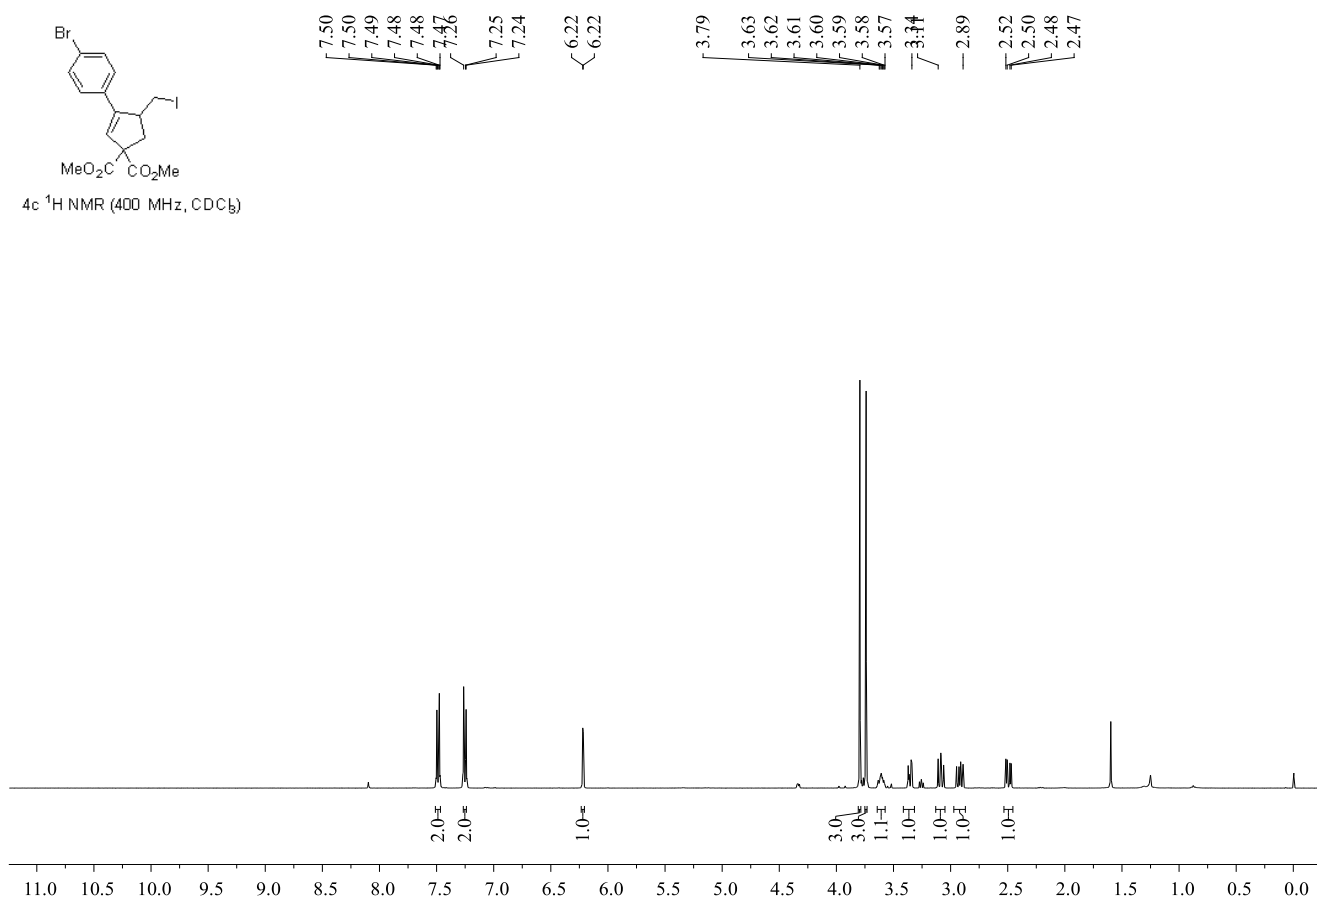

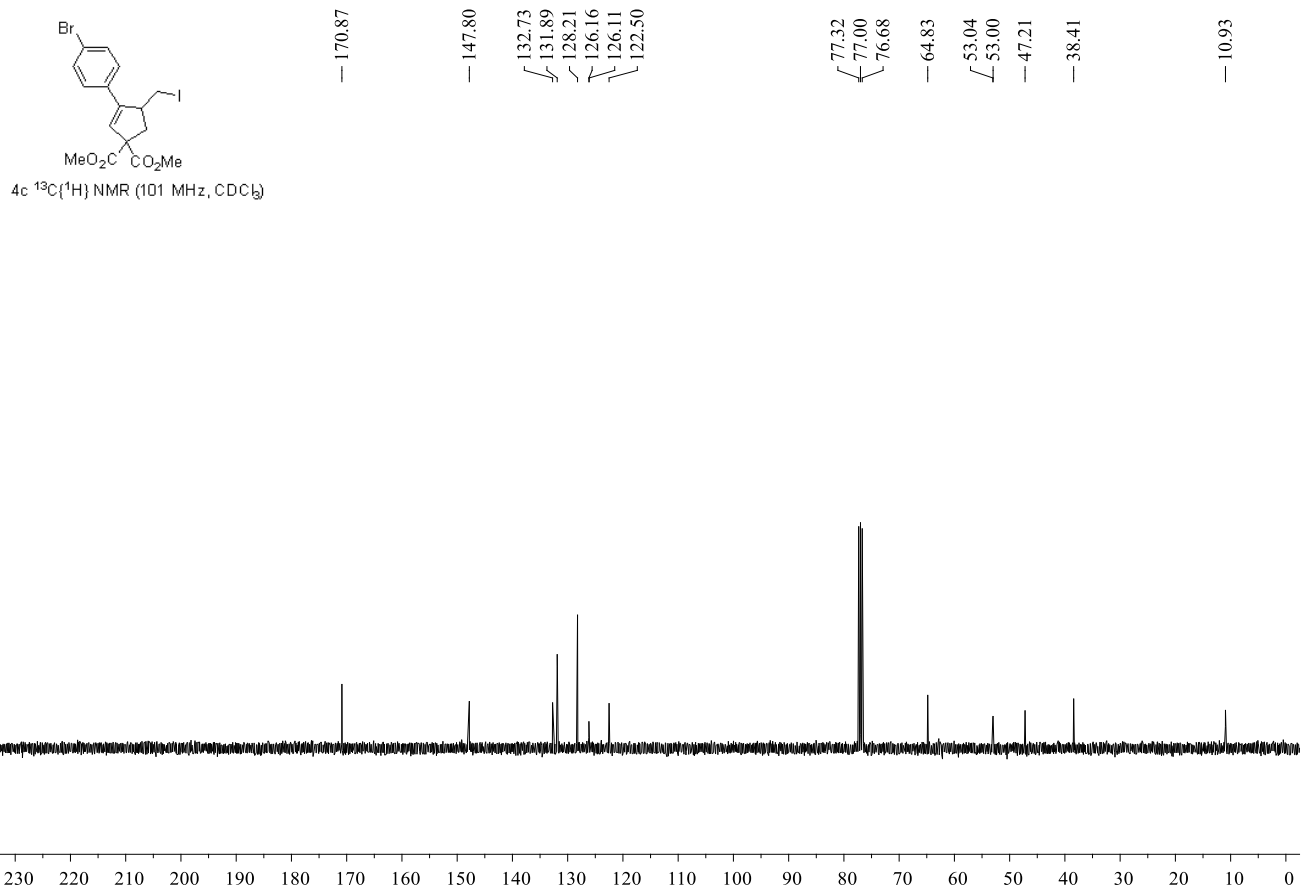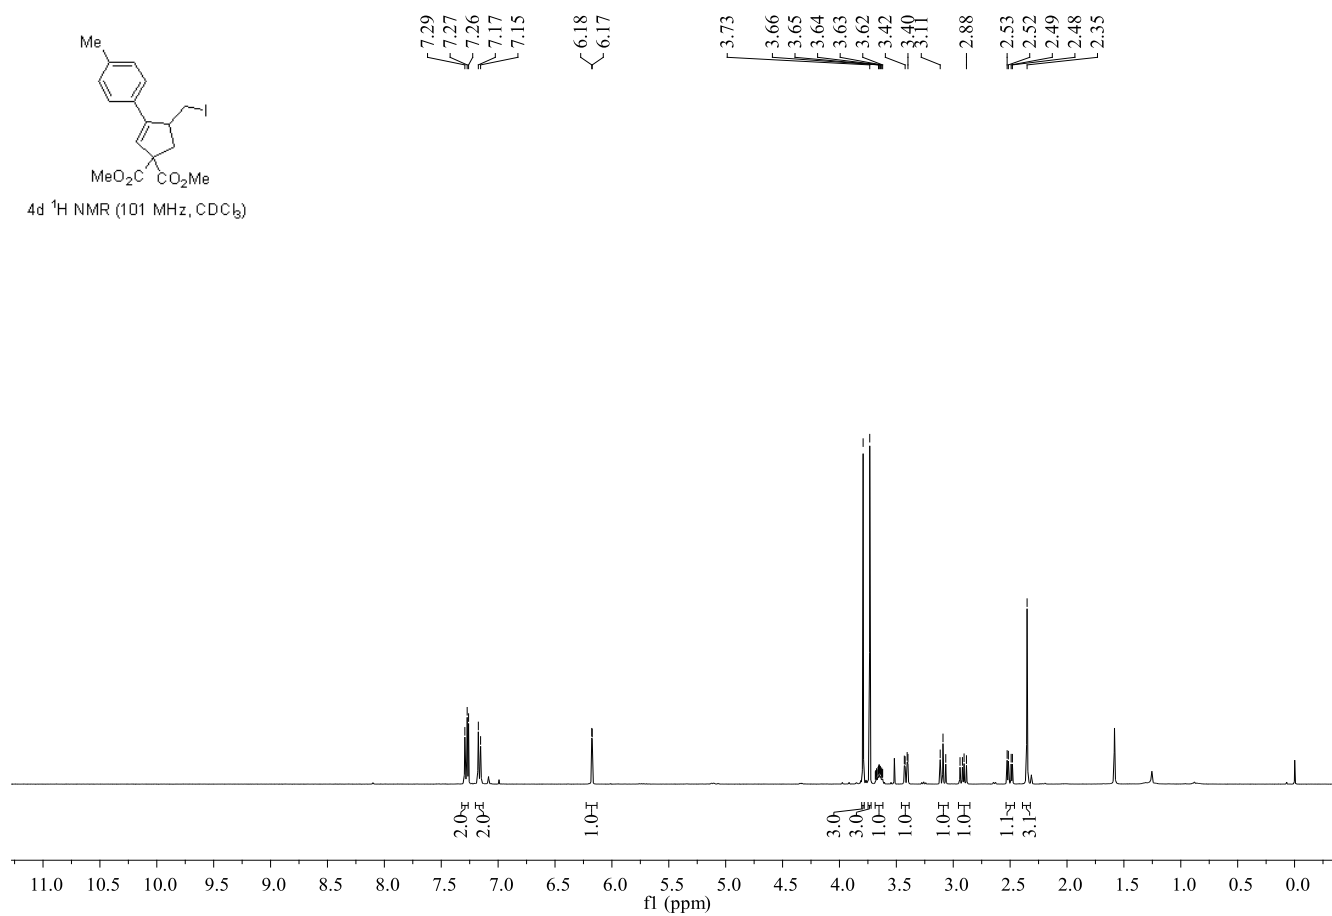

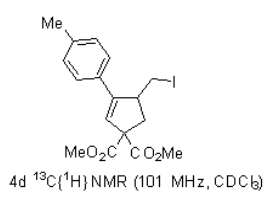

171.22  
 171.18  
 148.68  
 138.48  
 130.87  
 129.41  
 126.51  
 124.41  
 124.37  
 77.32  
 77.00  
 76.68  
 64.74  
 52.93  
 52.89  
 47.47  
 38.50  
 21.24  
 21.22  
 11.46

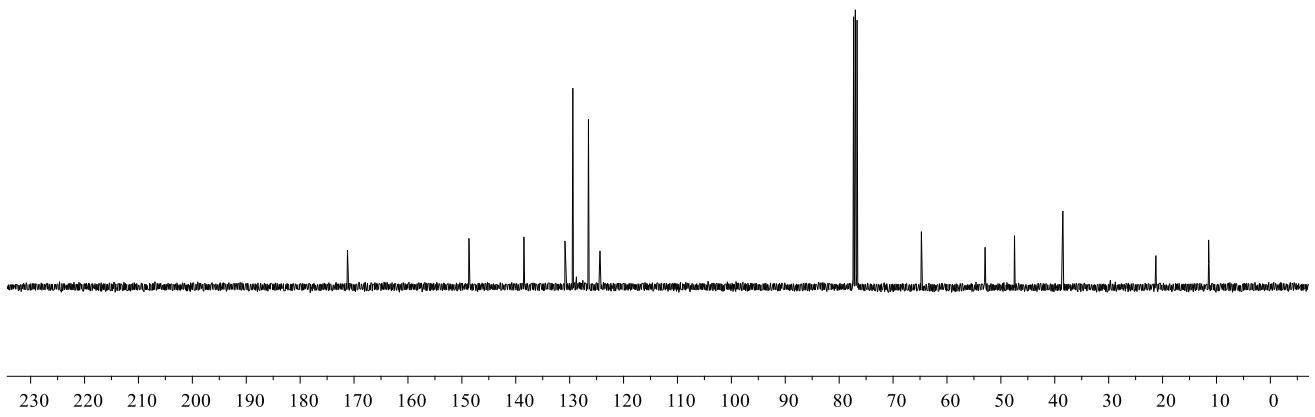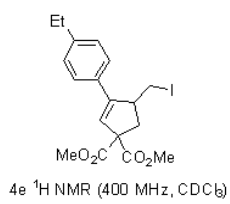

7.32  
 7.30  
 7.26  
 7.20  
 7.18  
 6.18  
 6.18  
 3.79  
 3.67  
 3.66  
 3.65  
 3.64  
 3.63  
 3.44  
 3.41  
 3.11  
 2.89  
 2.66  
 2.62  
 2.52  
 2.48  
 1.25  
 1.23  
 1.21

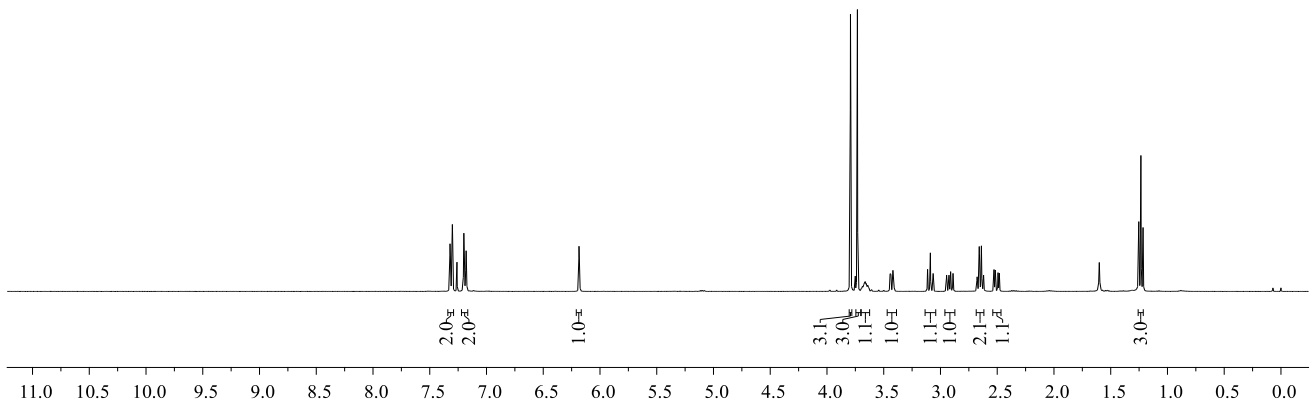

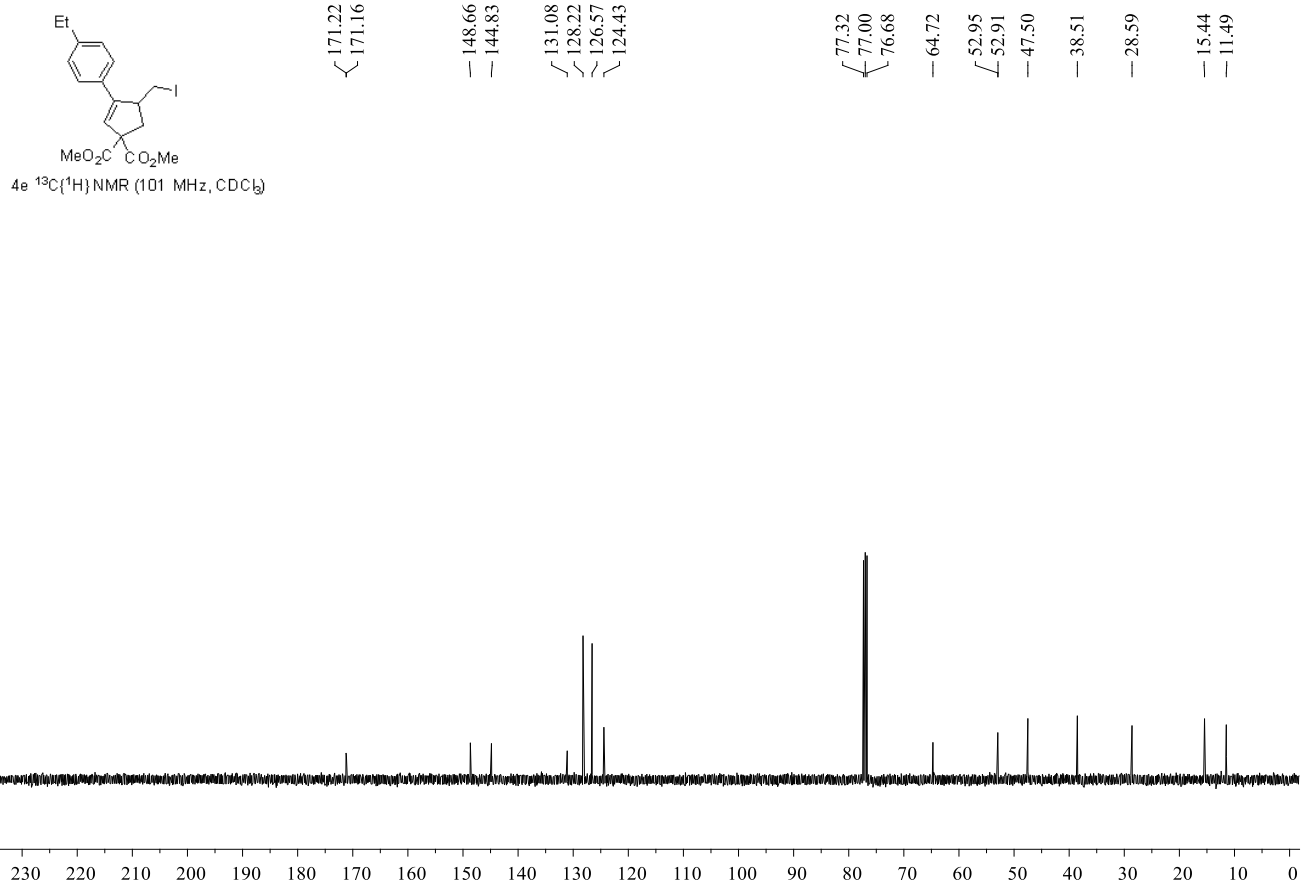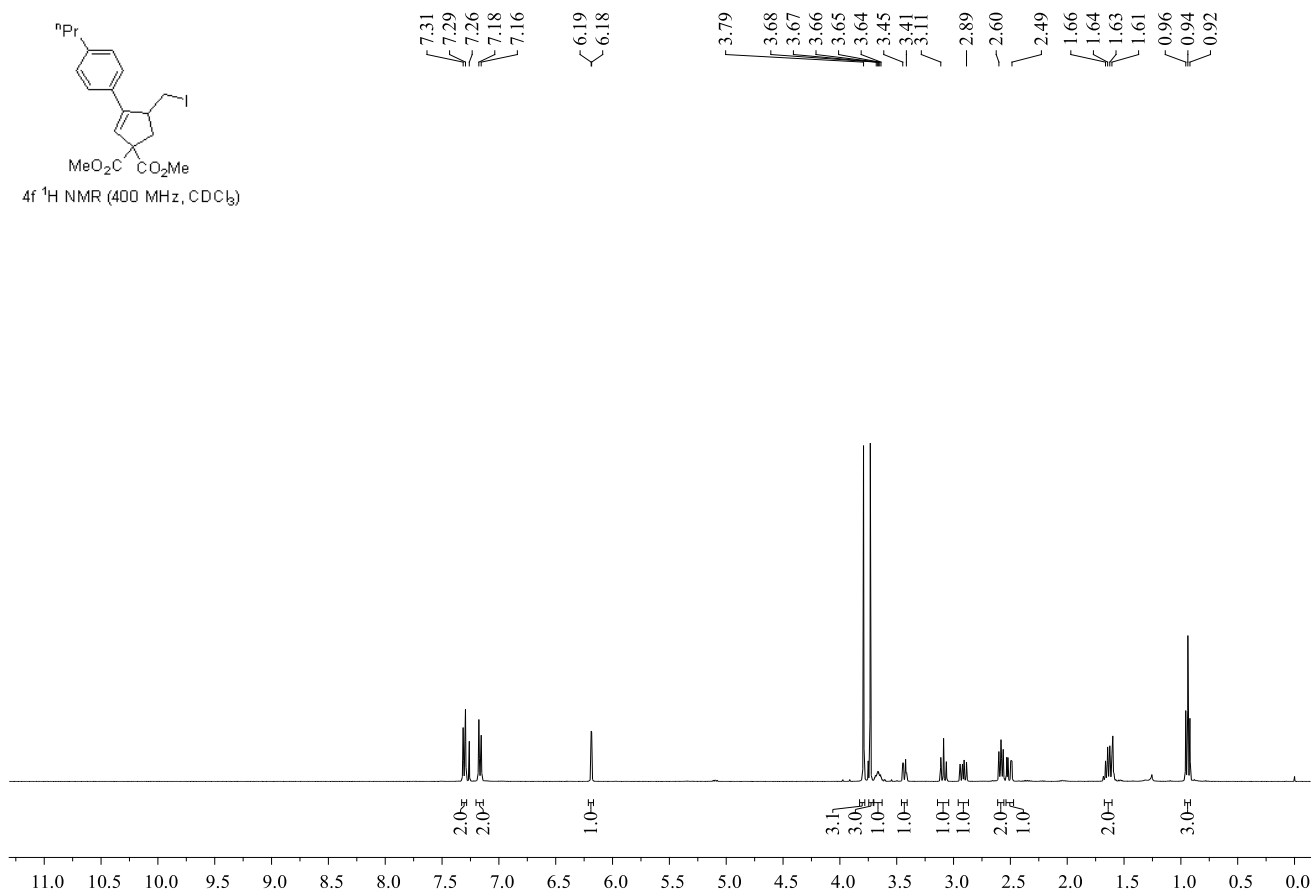

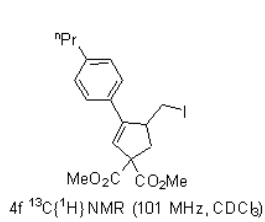

$\delta$  171.22  
 $\delta$  171.17  
 $\delta$  148.66  
 $\delta$  143.31  
 $\delta$  131.06  
 $\delta$  128.81  
 $\delta$  126.47  
 $\delta$  124.38  
 $\delta$  77.32  
 $\delta$  77.00  
 $\delta$  76.68  
 $\delta$  64.72  
 $\delta$  52.95  
 $\delta$  52.91  
 $\delta$  47.52  
 $\delta$  38.52  
 $\delta$  37.73  
 $\delta$  24.41  
 $\delta$  13.78  
 $\delta$  11.47

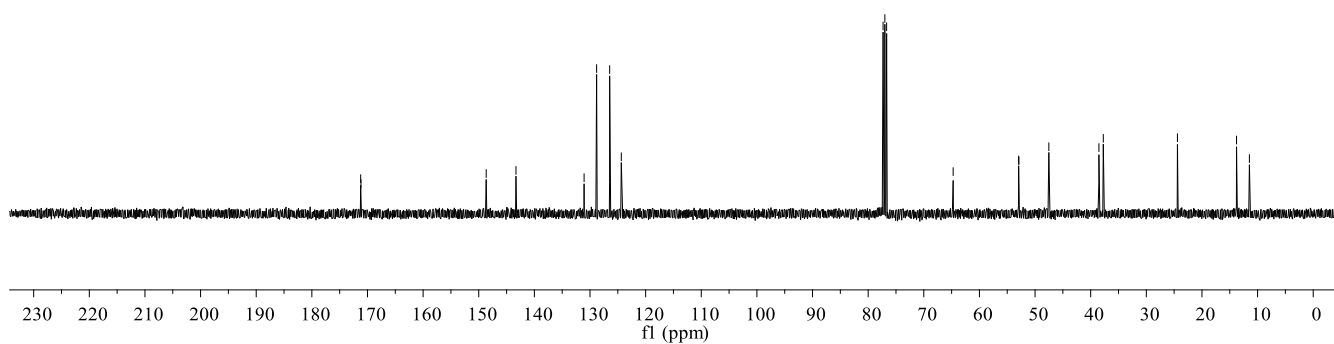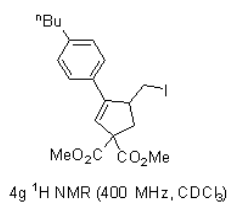

$\delta$  7.31  
 $\delta$  7.29  
 $\delta$  7.26  
 $\delta$  7.18  
 $\delta$  7.16  
 $\delta$  6.19  
 $\delta$  6.18  
 $\delta$  3.70  
 $\delta$  3.69  
 $\delta$  3.68  
 $\delta$  3.67  
 $\delta$  3.65  
 $\delta$  3.65  
 $\delta$  3.63  
 $\delta$  3.45  
 $\delta$  3.41  
 $\delta$  3.11  
 $\delta$  2.89  
 $\delta$  2.48  
 $\delta$  1.61  
 $\delta$  1.57  
 $\delta$  1.36  
 $\delta$  1.32  
 $\delta$  0.94  
 $\delta$  0.93  
 $\delta$  0.91

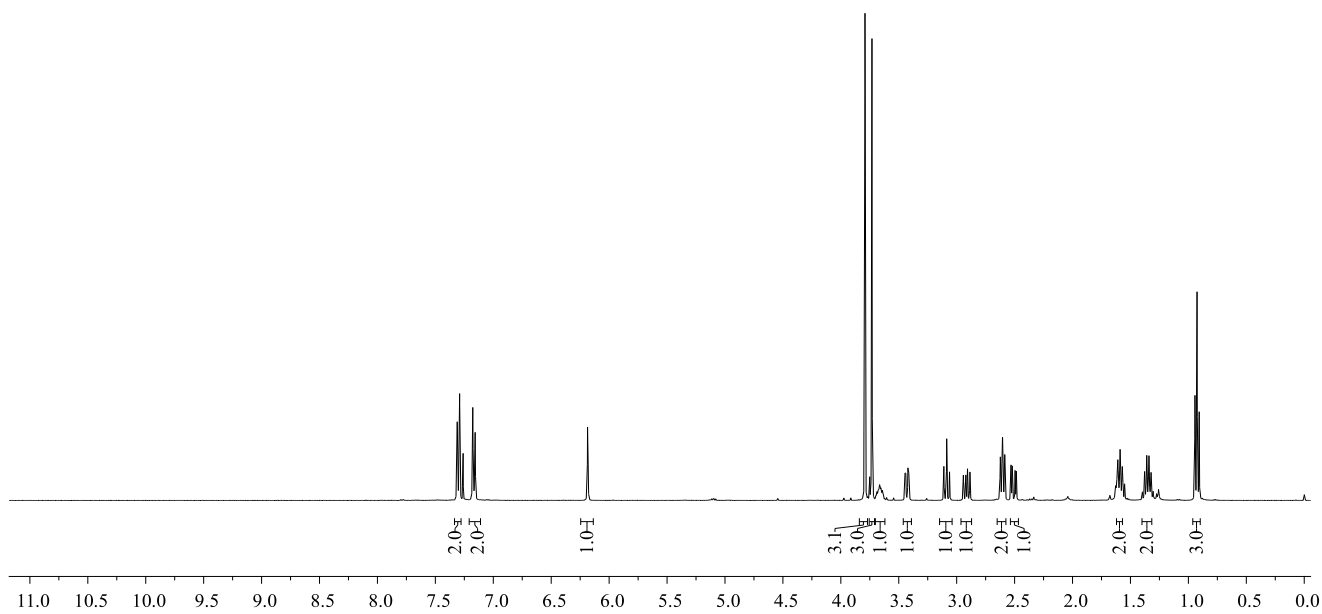

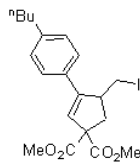

4g  $^{13}\text{C}\{^1\text{H}\}$  NMR (101 MHz,  $\text{CDCl}_3$ )

$\delta$  171.21, 171.15, 148.65, 143.52, 131.01, 128.76, 126.47, 124.36, 77.32, 77.00, 76.68, 64.71, 52.94, 52.90, 47.52, 38.52, 35.35, 33.45, 22.30, 13.91, 11.47

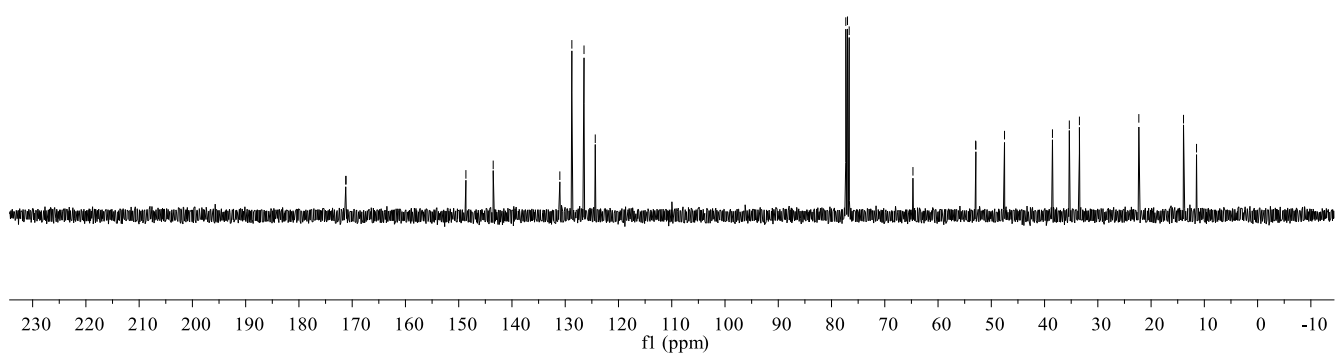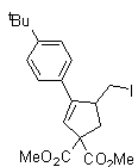

4h  $^1\text{H}$  NMR (400 MHz,  $\text{CDCl}_3$ )

$\delta$  7.38, 7.37, 7.33, 7.32, 7.26, 6.20, 6.19, 3.79, 3.69, 3.68, 3.66, 3.66, 3.64, 3.46, 3.43, 3.11, 2.89, 2.53, 2.52, 2.49, 2.48, 1.32

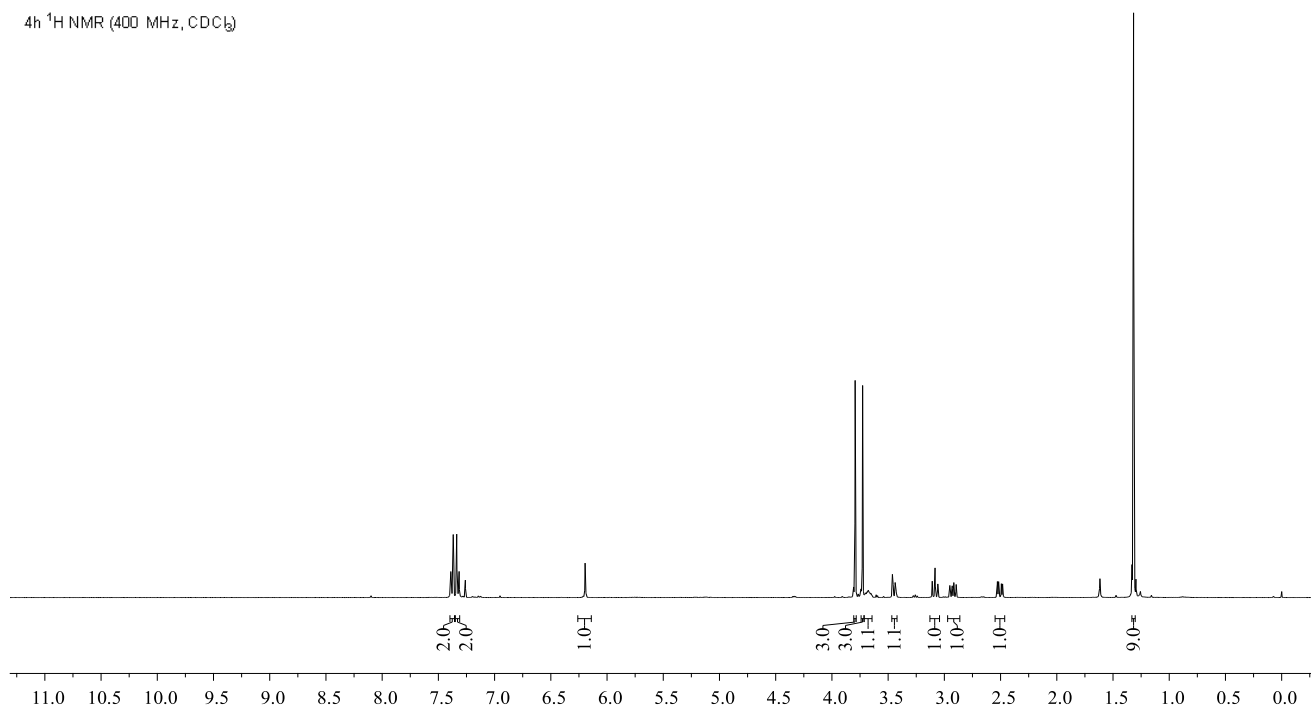



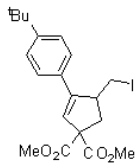

4h  $^{13}\text{C}\{^1\text{H}\}$  NMR (101 MHz,  $\text{CDCl}_3$ )

- 171.22
- 171.13
- 151.70
- 148.52
- 130.81
- 126.28
- 125.63
- 124.51
- 77.32
- 77.00
- 76.68
- 64.74
- 52.91
- 52.86
- 47.57
- 38.57
- 34.63
- 31.20
- 11.47

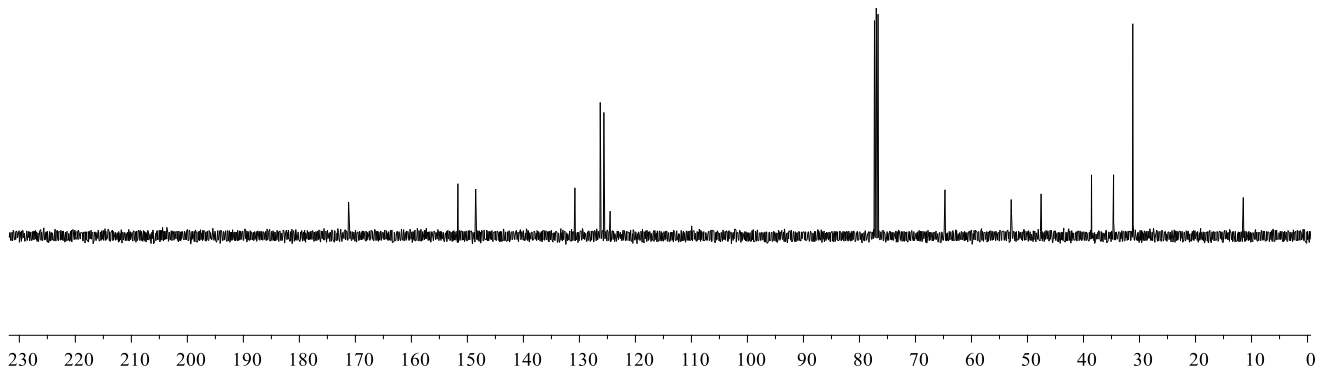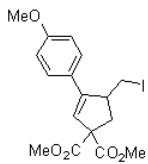

4i  $^1\text{H}$  NMR (400 MHz,  $\text{CDCl}_3$ )

- 7.34
- 7.33
- 7.32
- 7.26
- 6.89
- 6.87
- 6.12
- 6.11
- 3.79
- 3.63
- 3.62
- 3.62
- 3.61
- 3.60
- 3.42
- 3.39
- 3.11
- 2.86
- 2.54
- 2.53
- 2.50
- 2.49

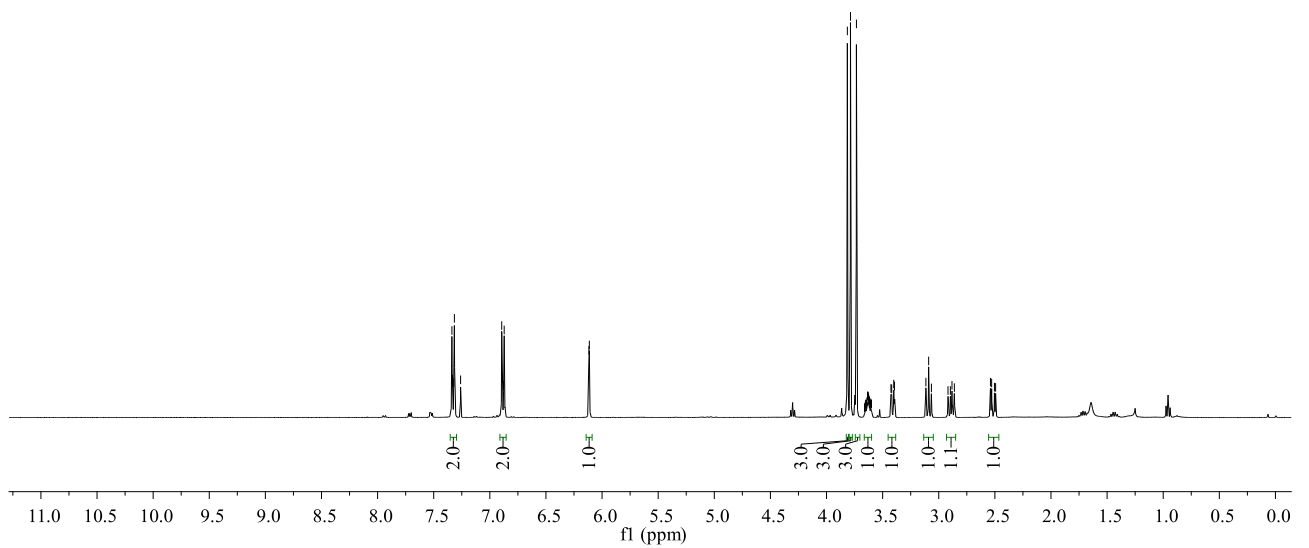

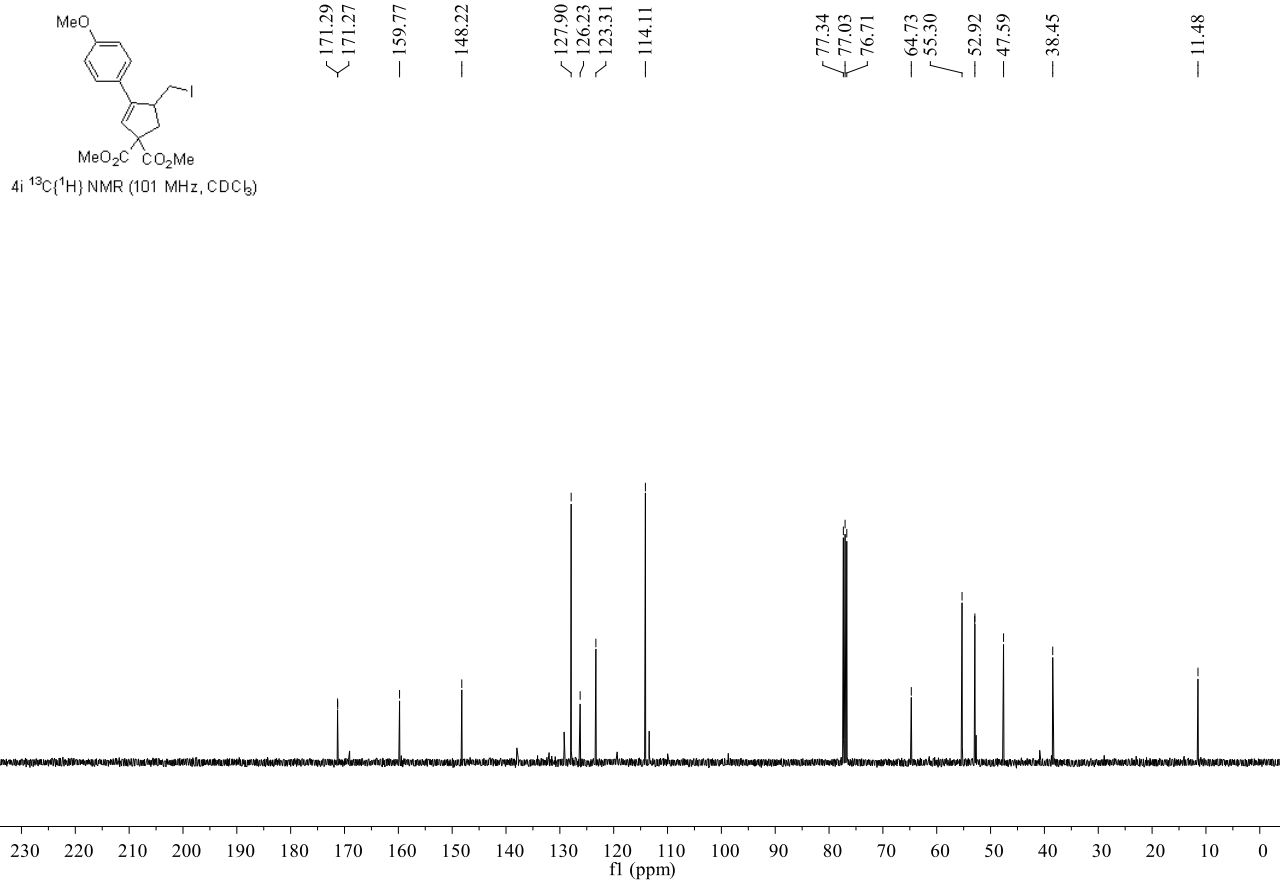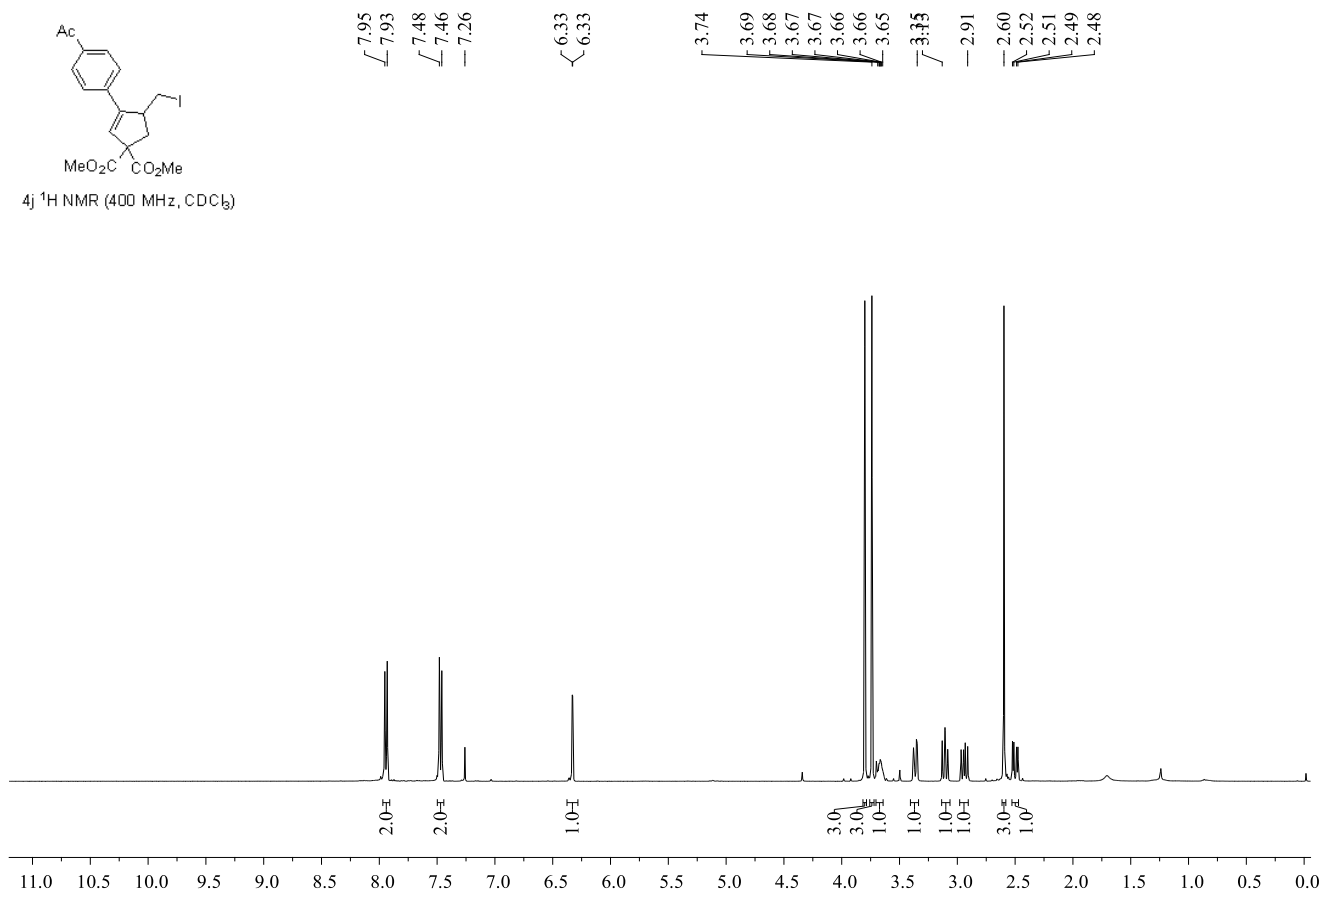

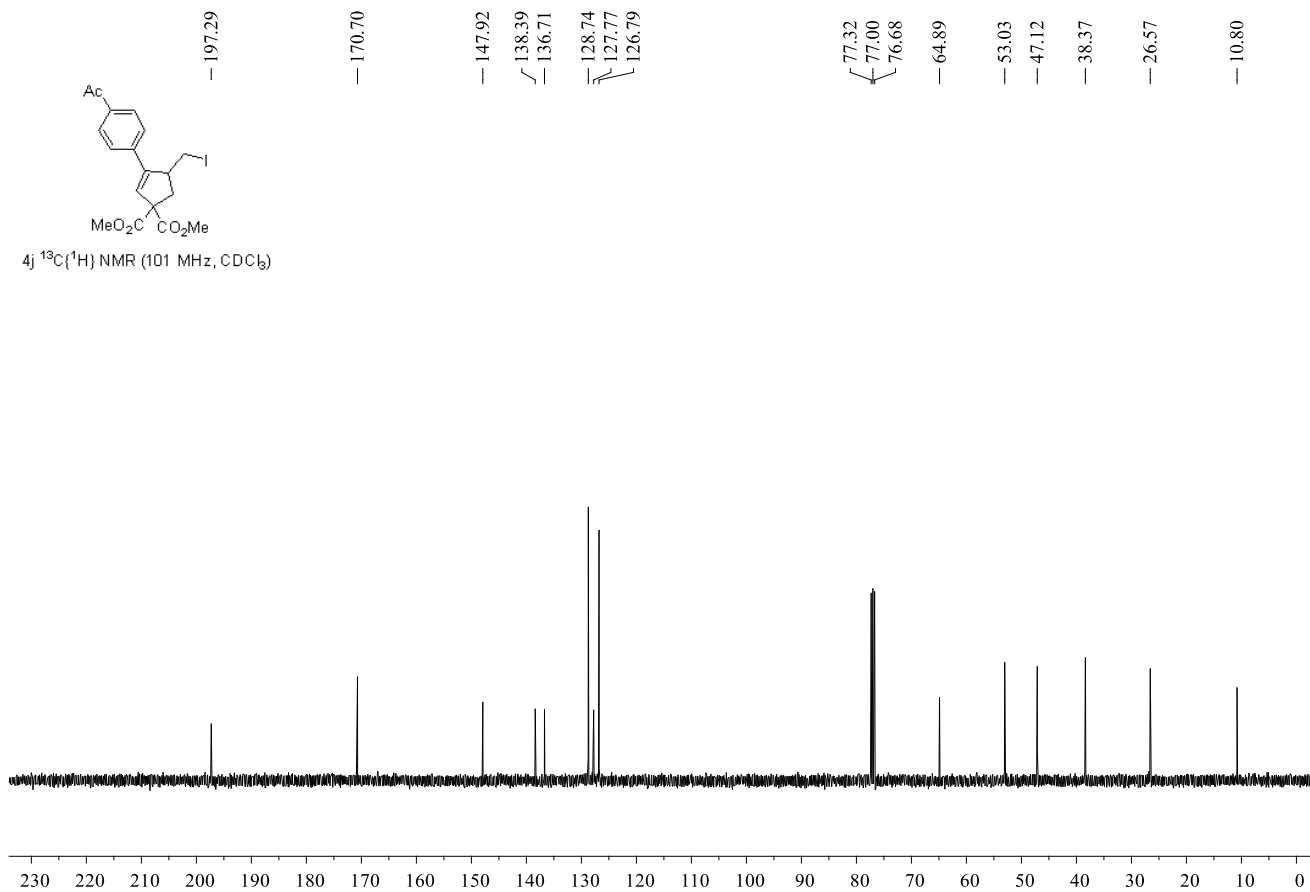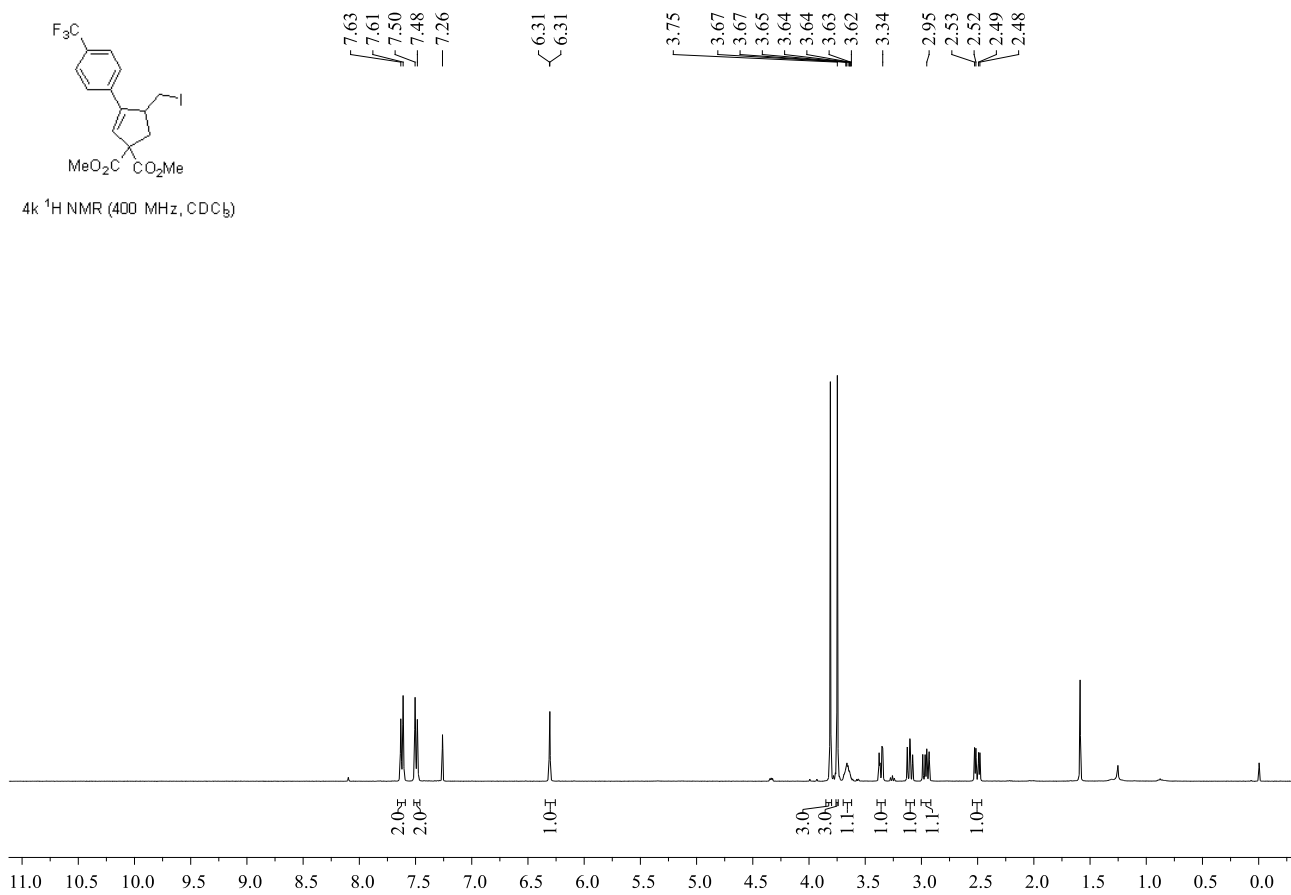

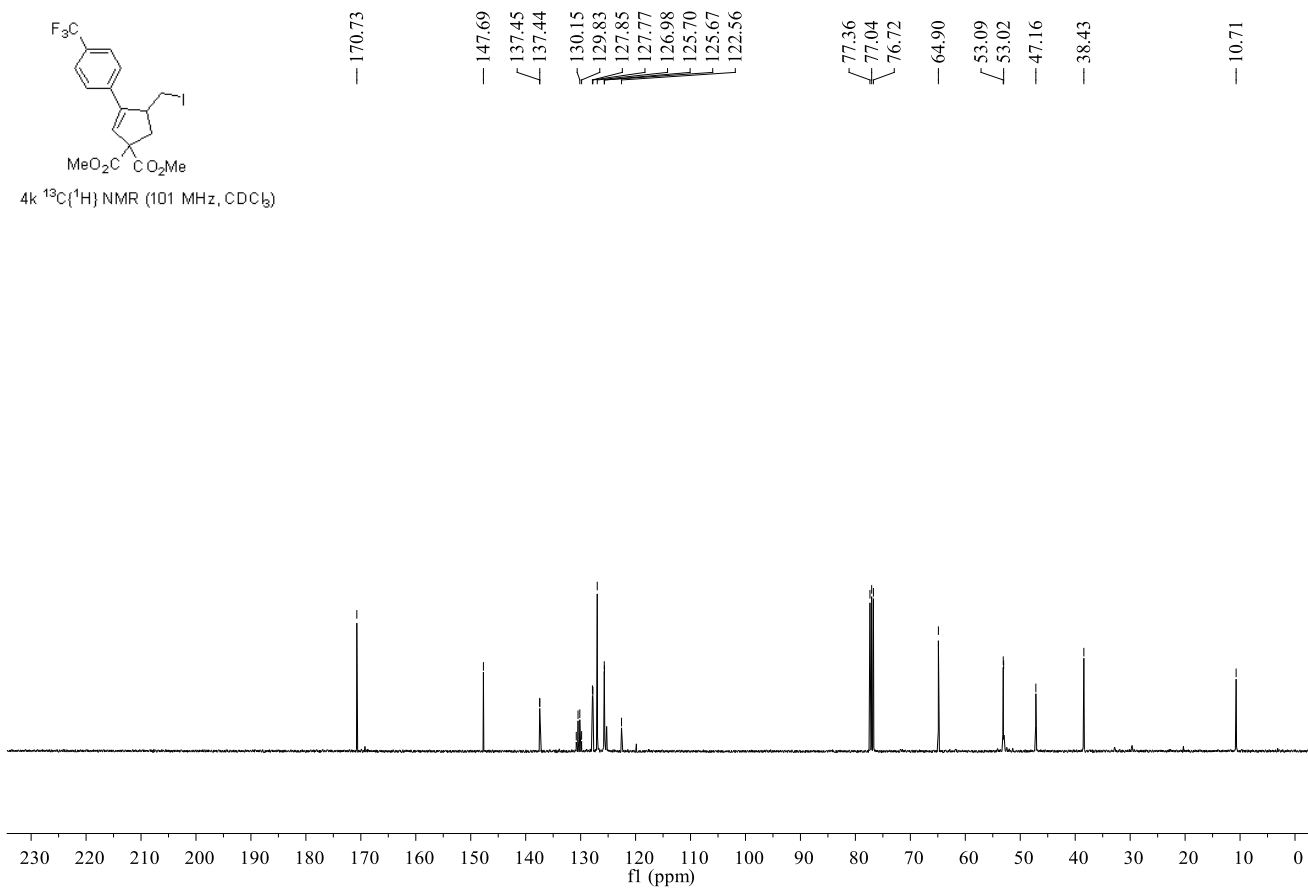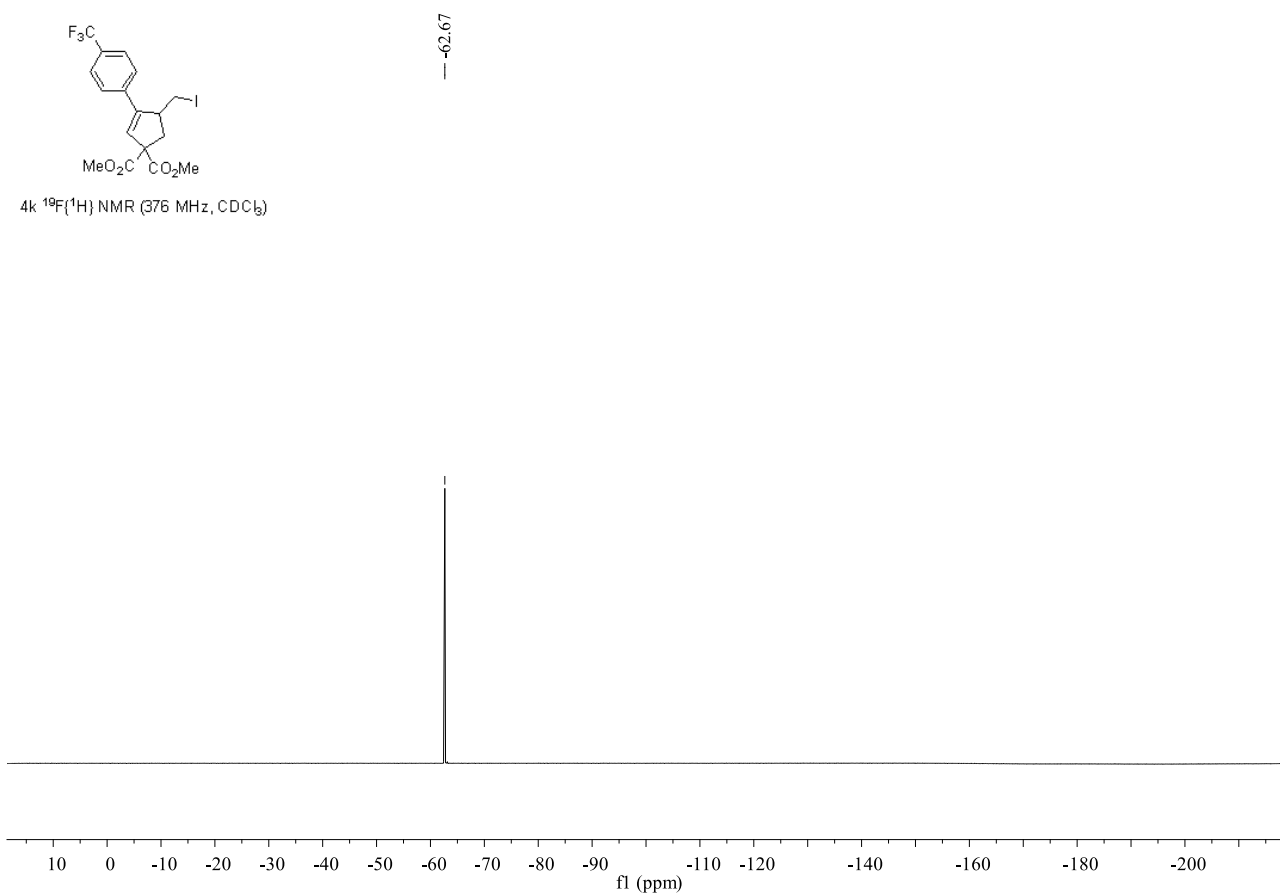

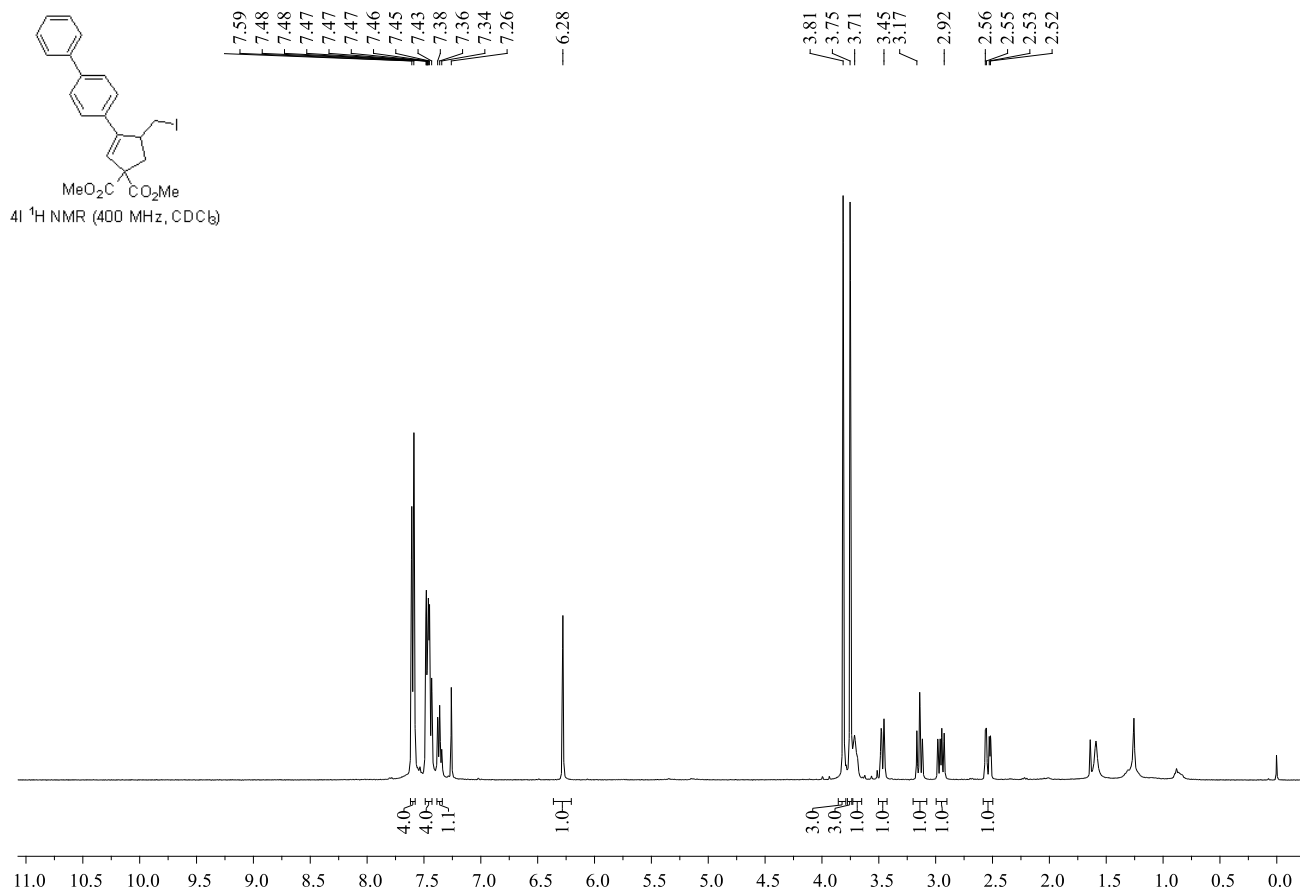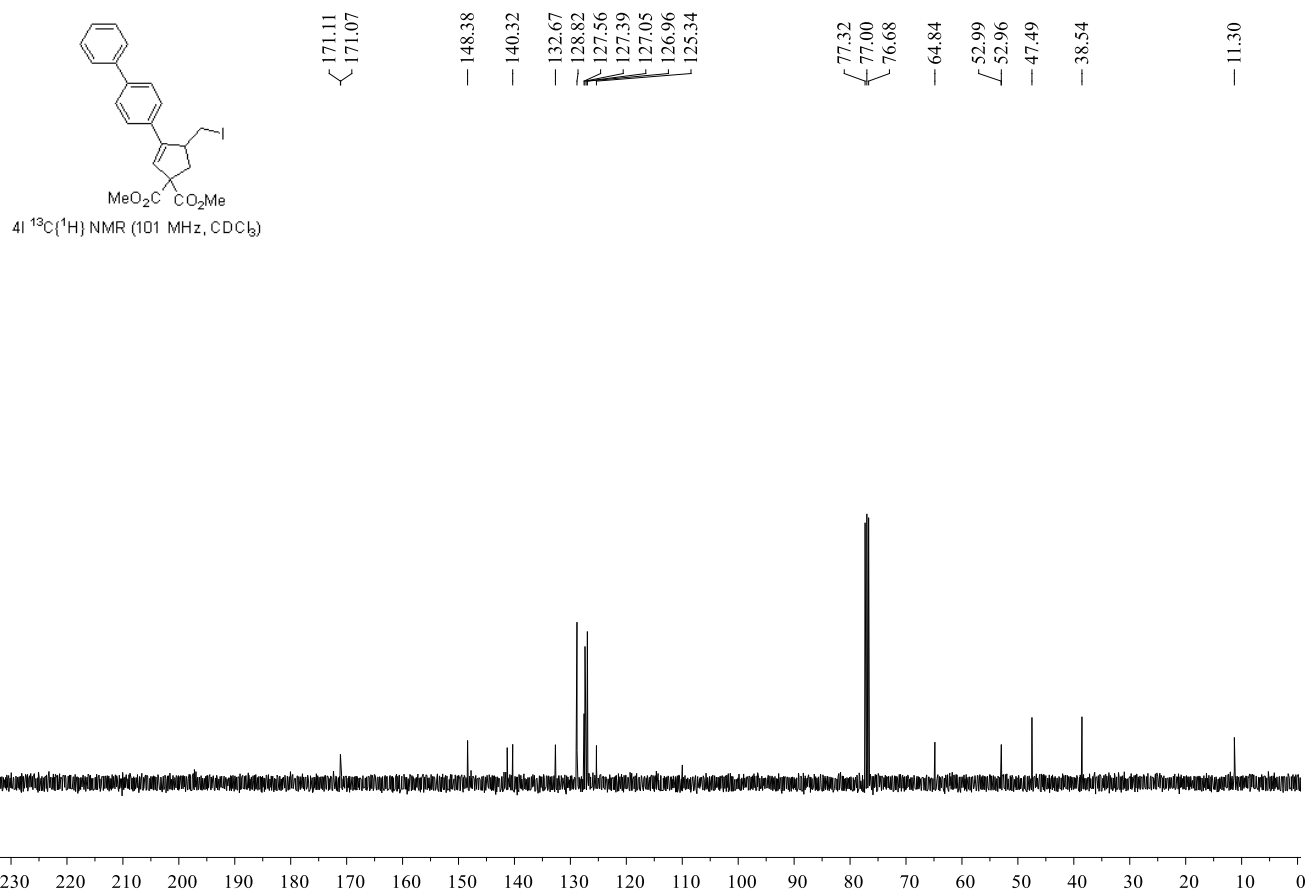

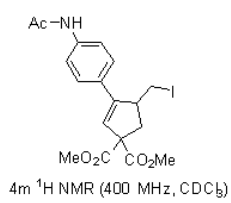

4m <sup>1</sup>H NMR (400 MHz, CDCl<sub>3</sub>)

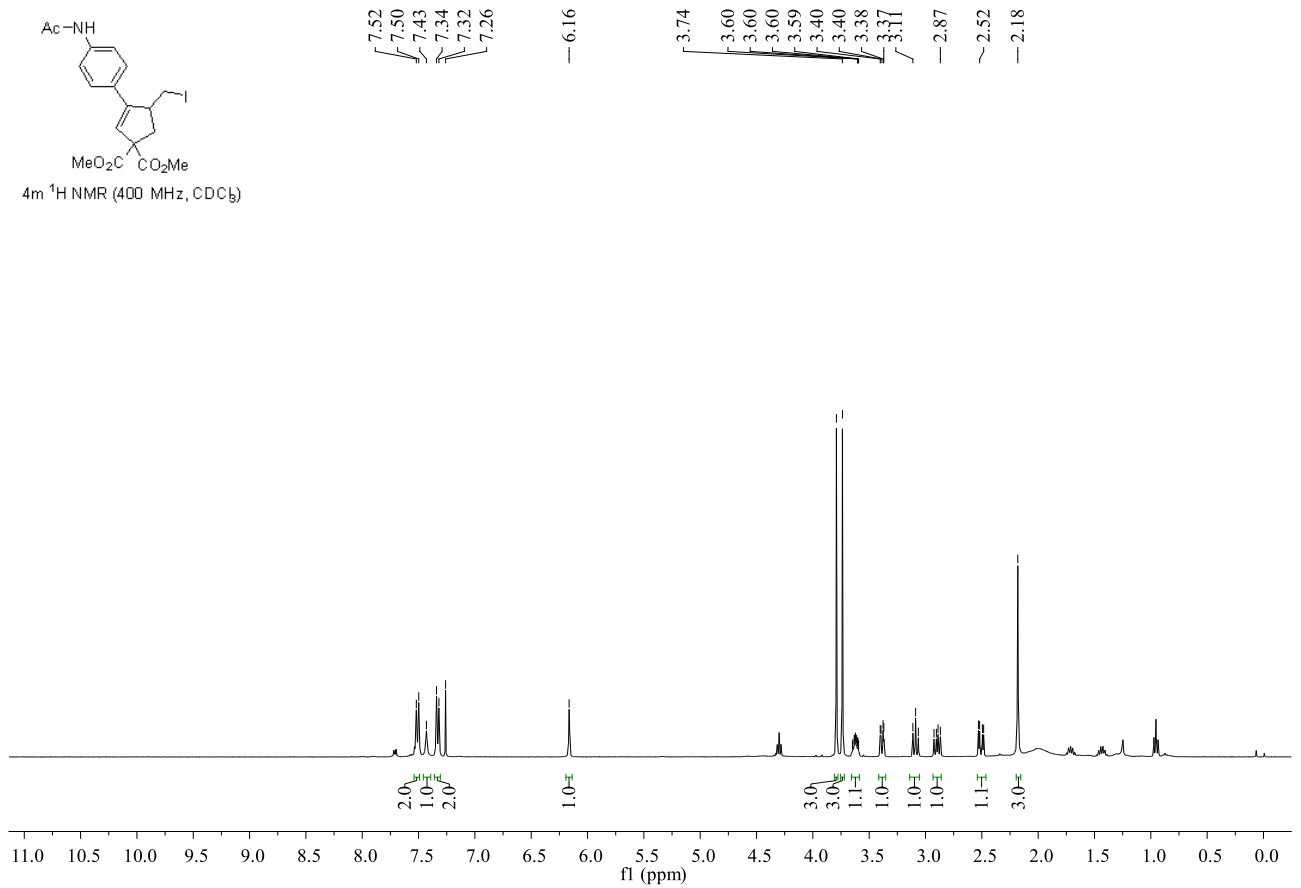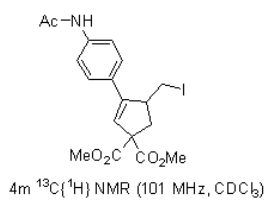

4m <sup>13</sup>C{<sup>1</sup>H} NMR (101 MHz, CDCl<sub>3</sub>)

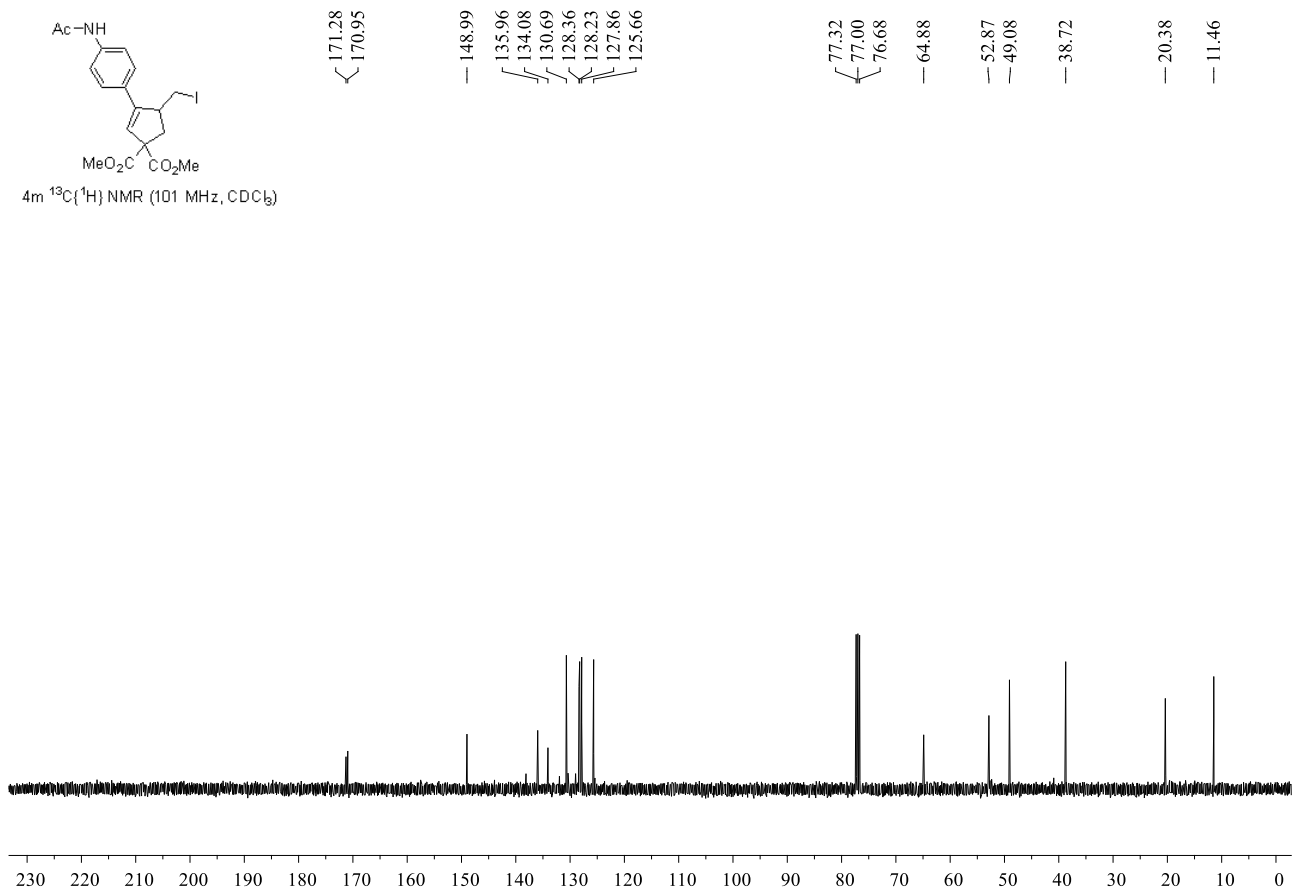

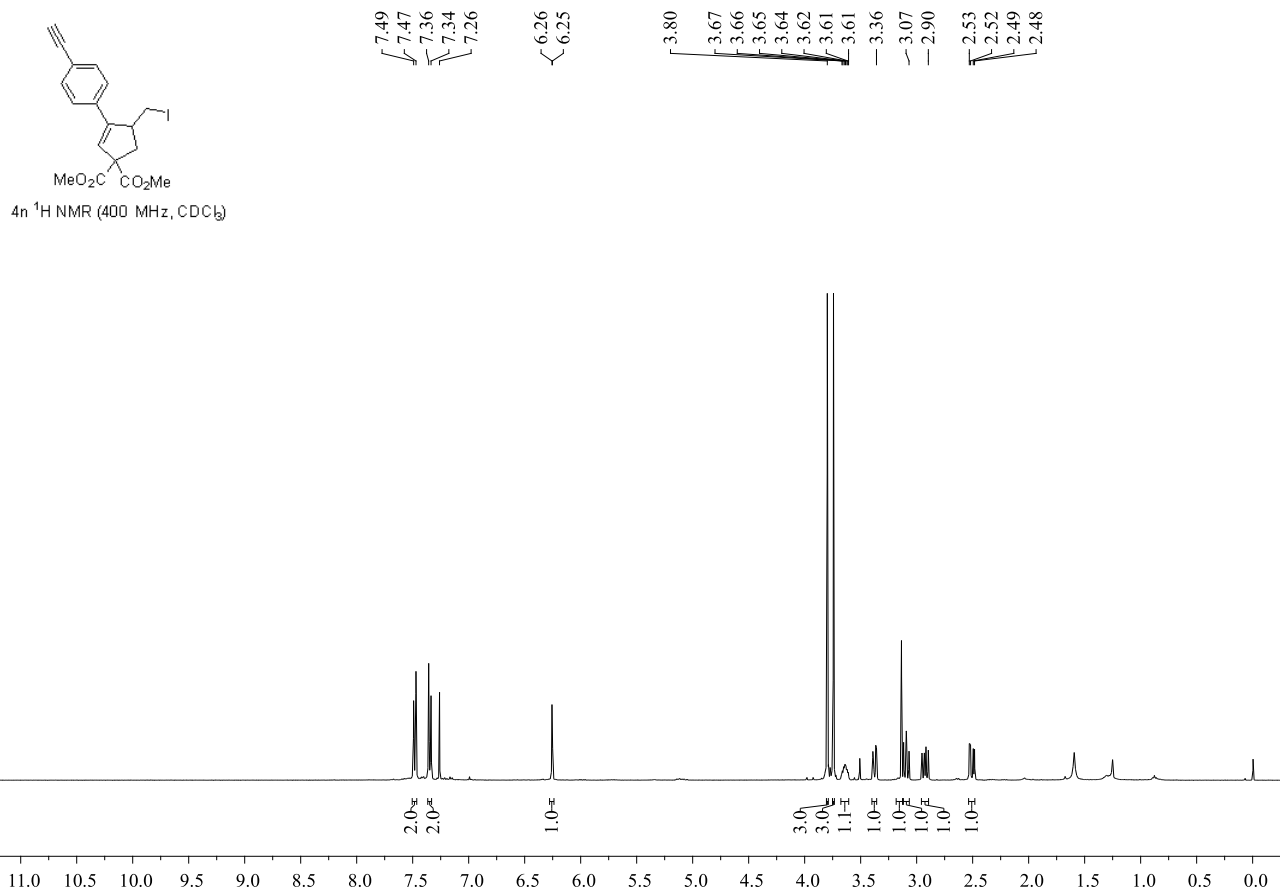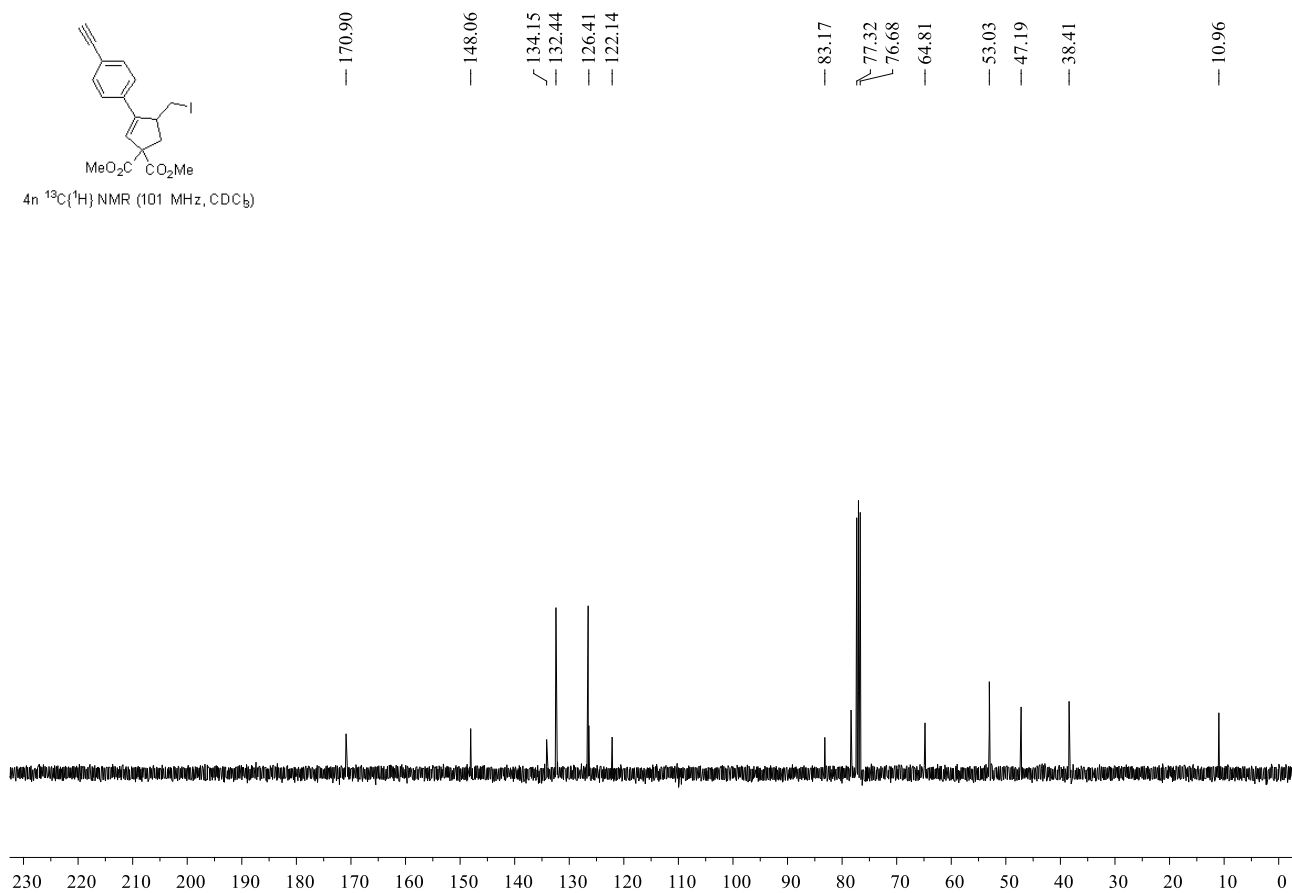

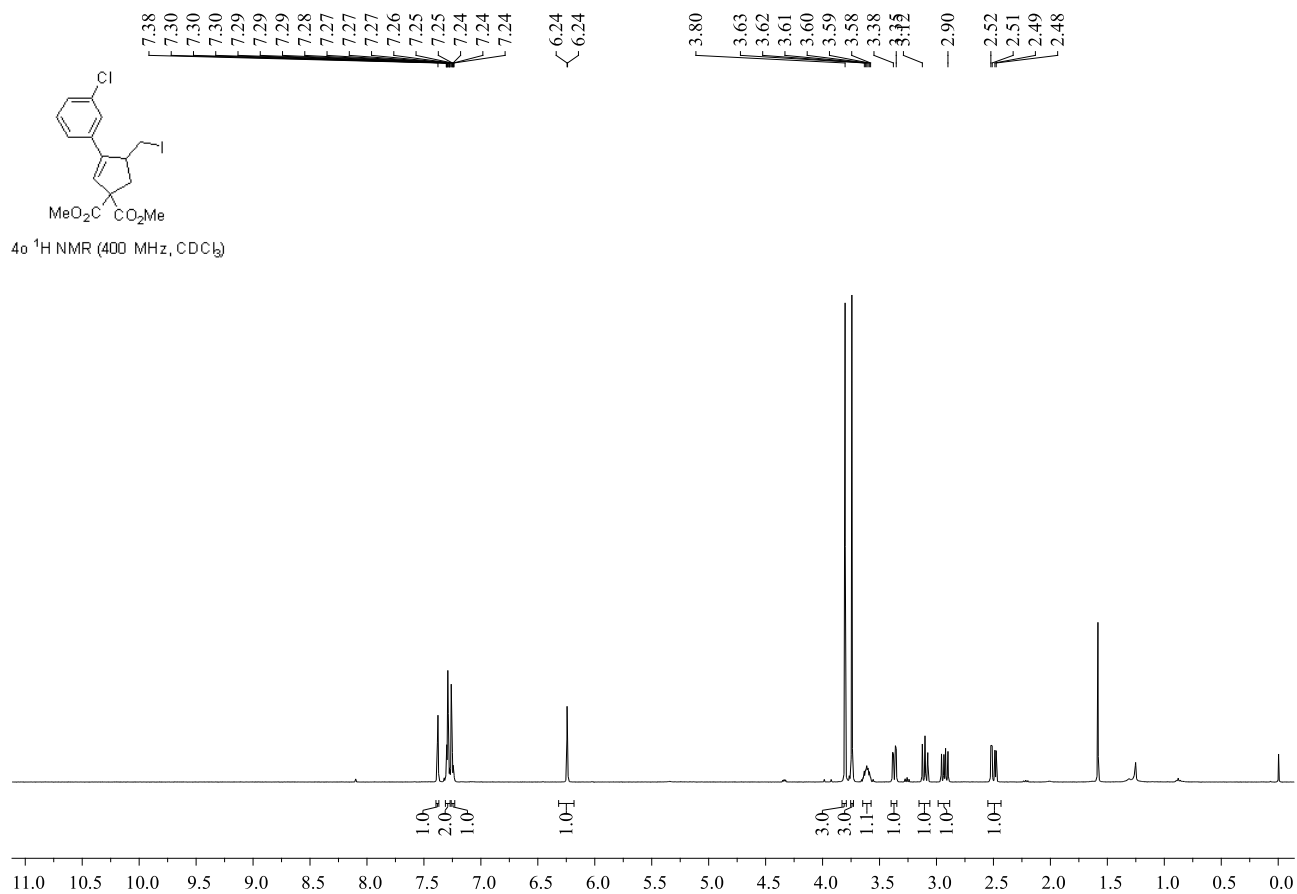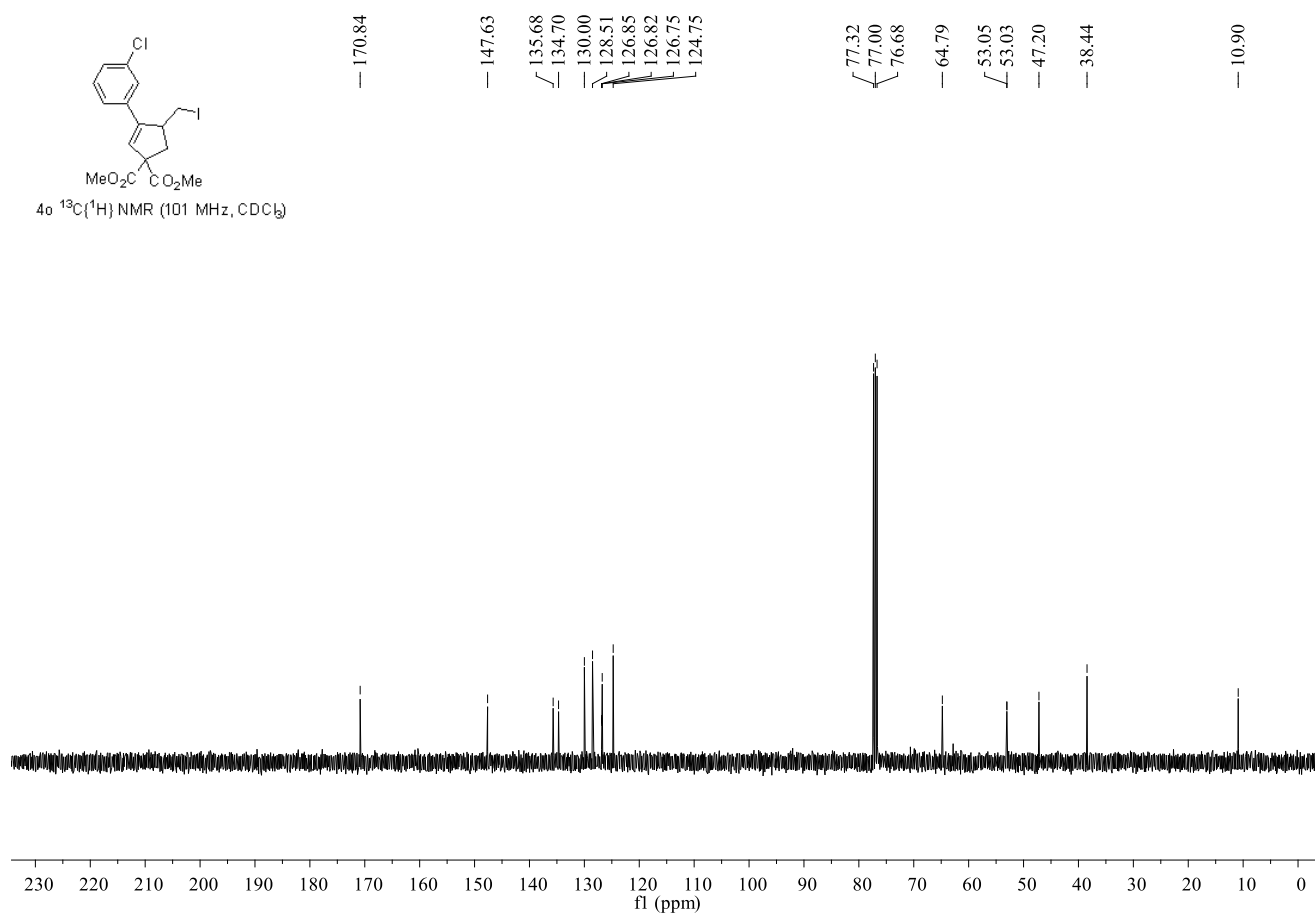



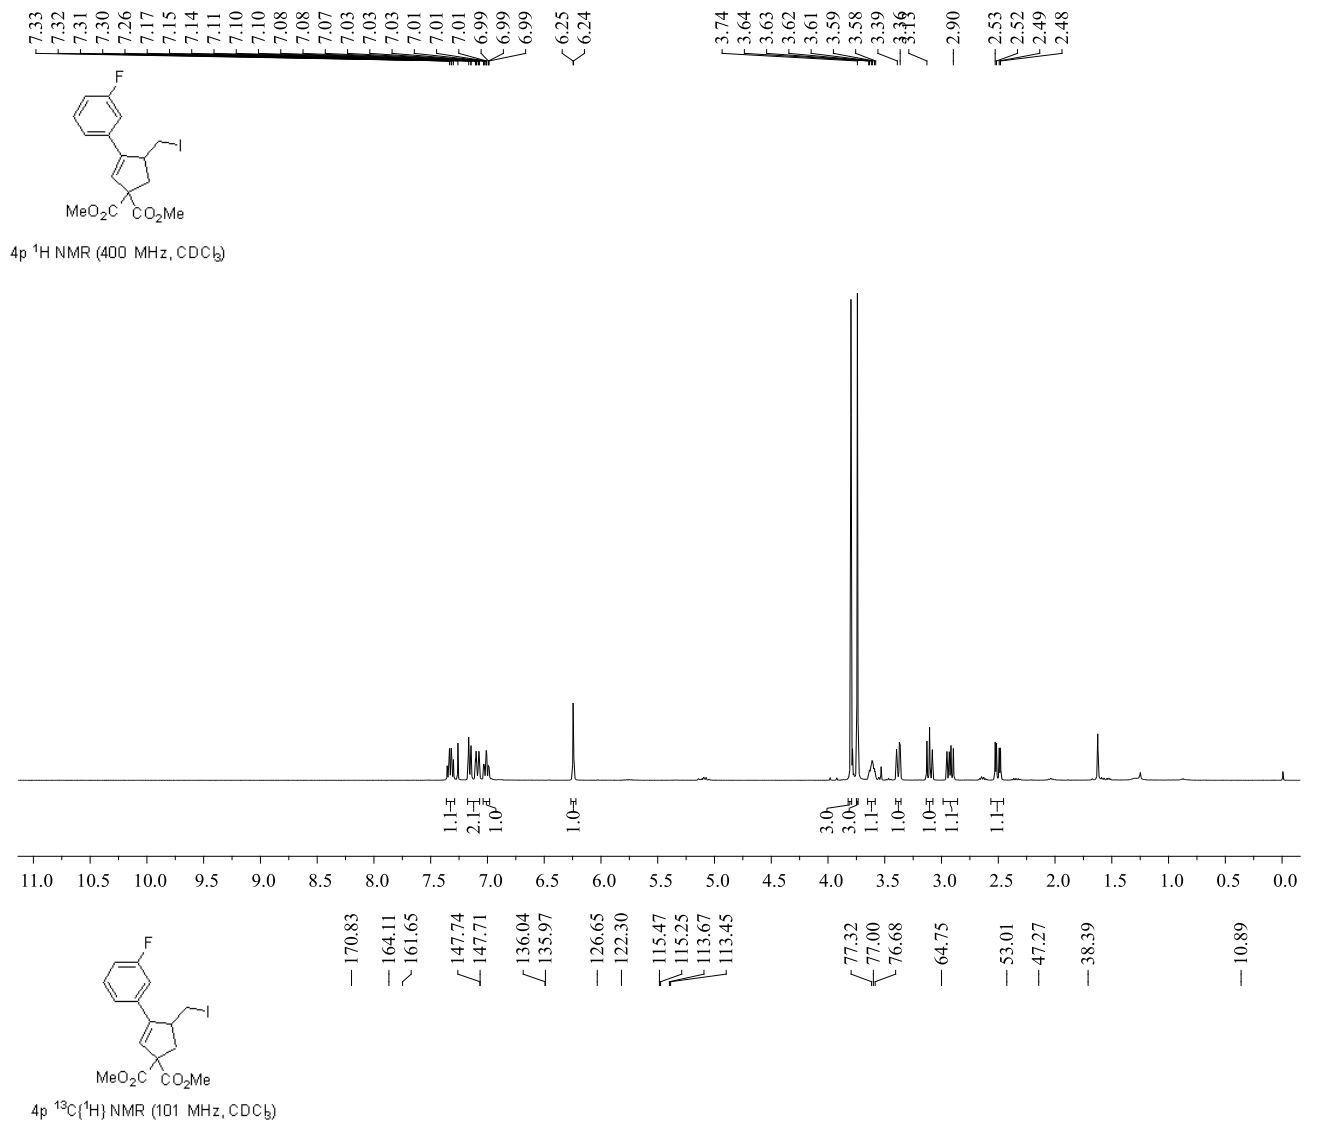



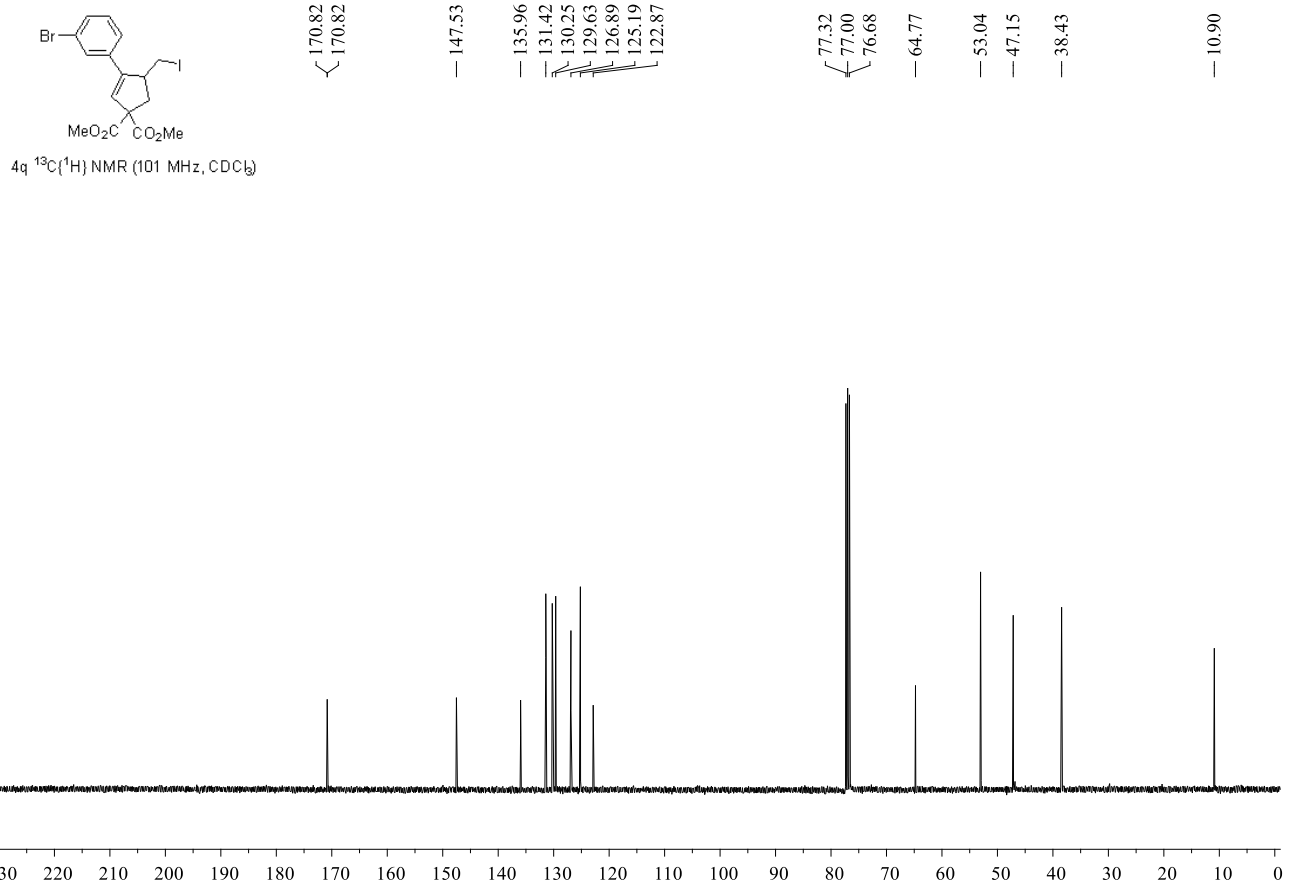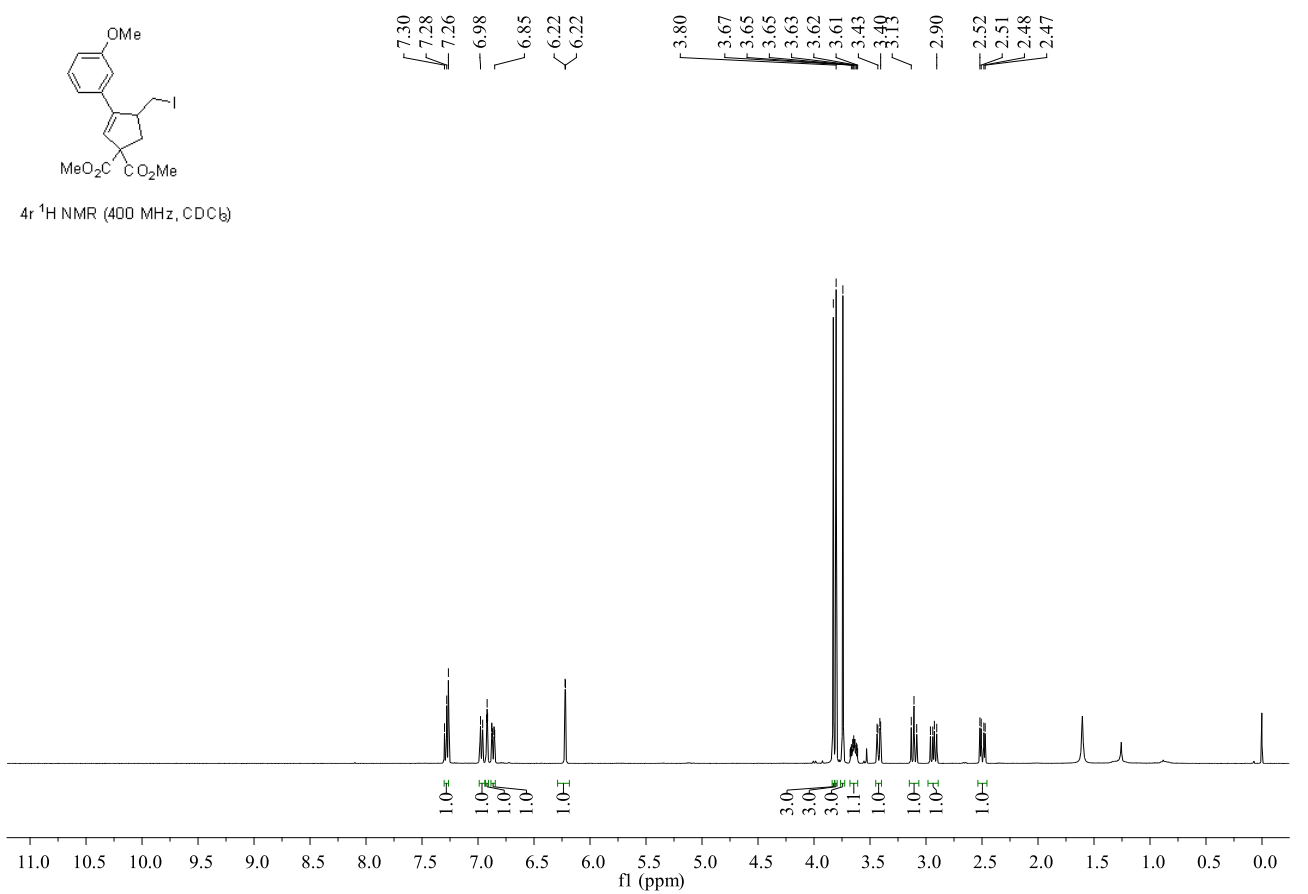

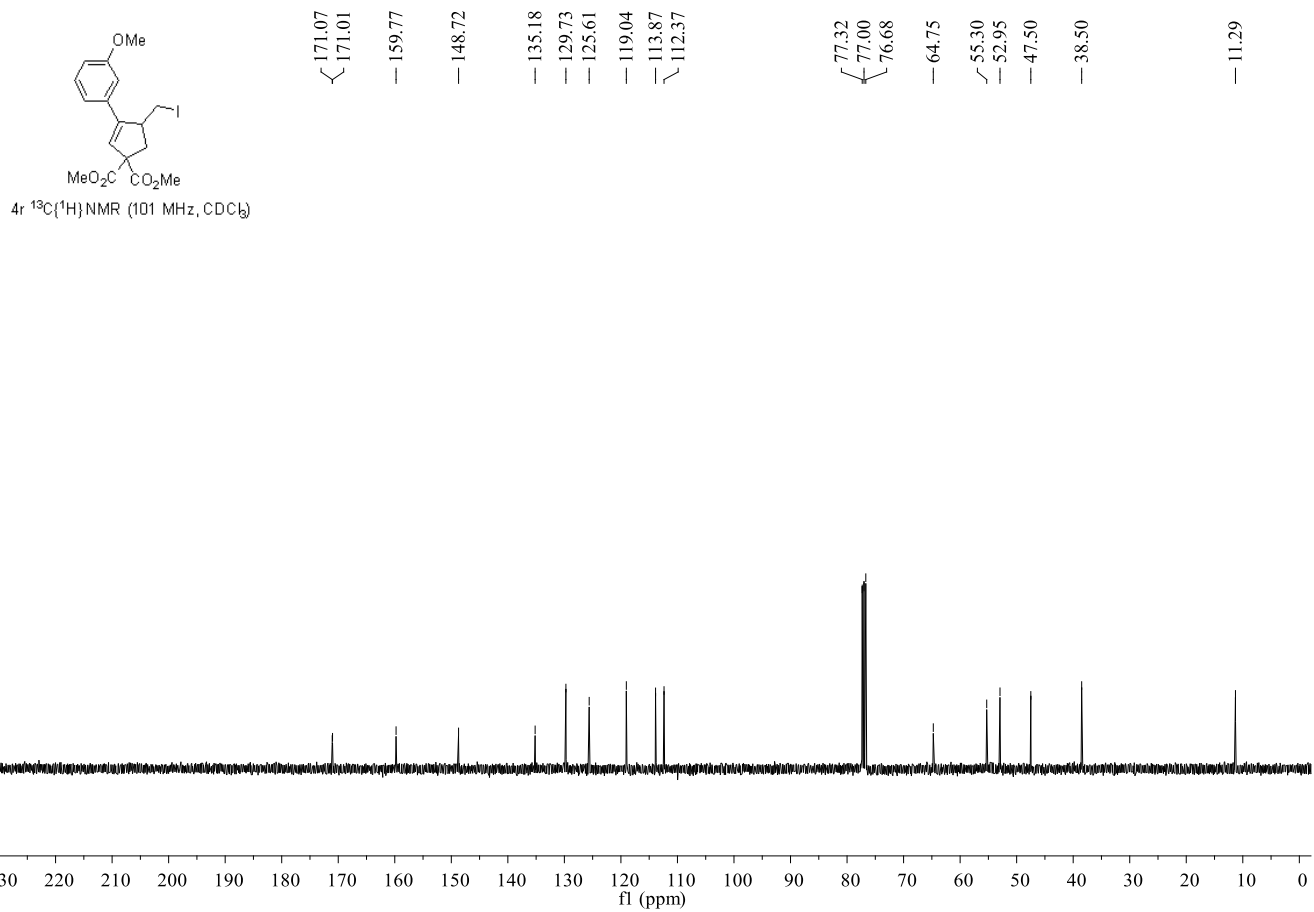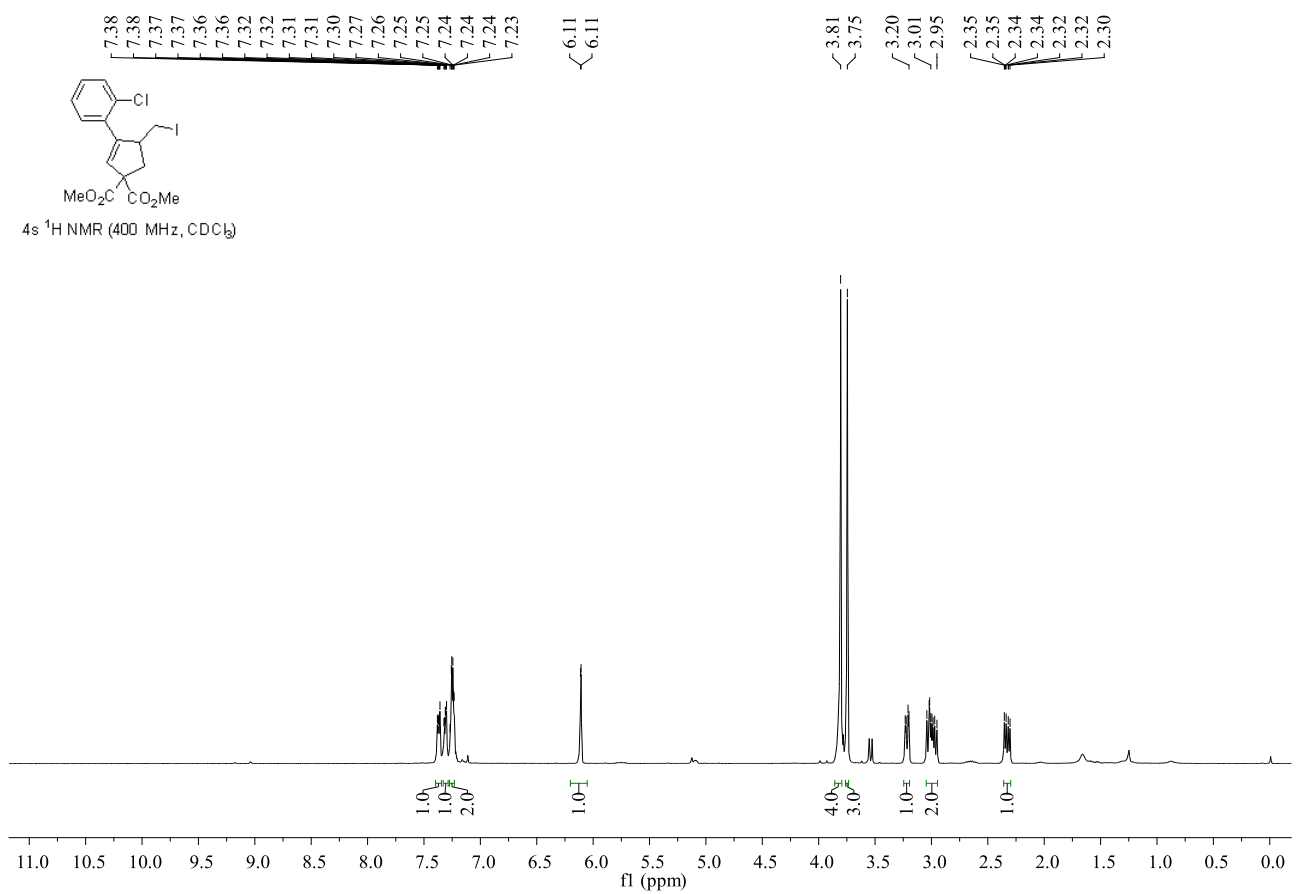

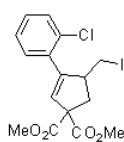

4s  $^{13}\text{C}$ ( $^1\text{H}$ ) NMR (101 MHz,  $\text{CDCl}_3$ )

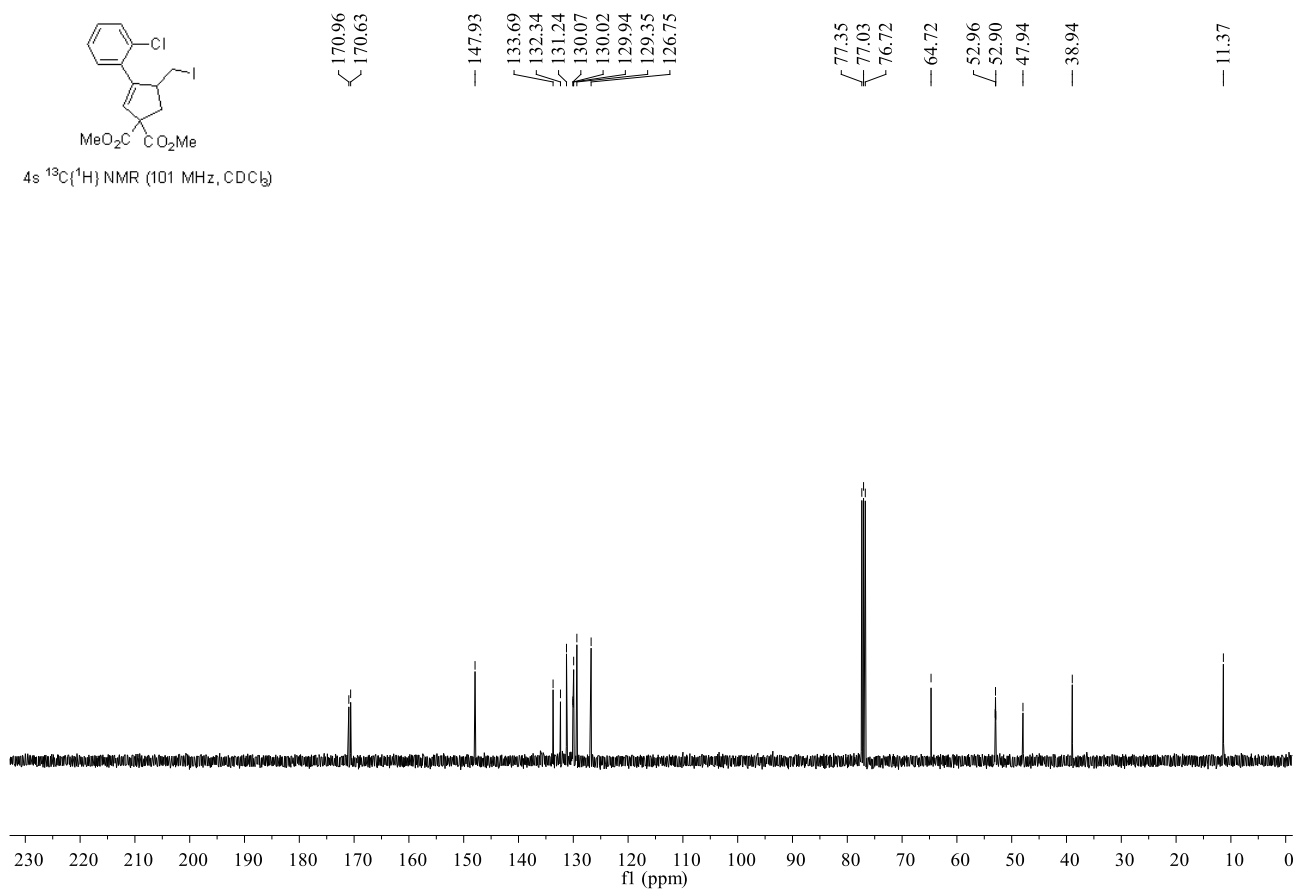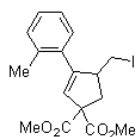

4t  $^1\text{H}$  NMR (400 MHz,  $\text{CDCl}_3$ )

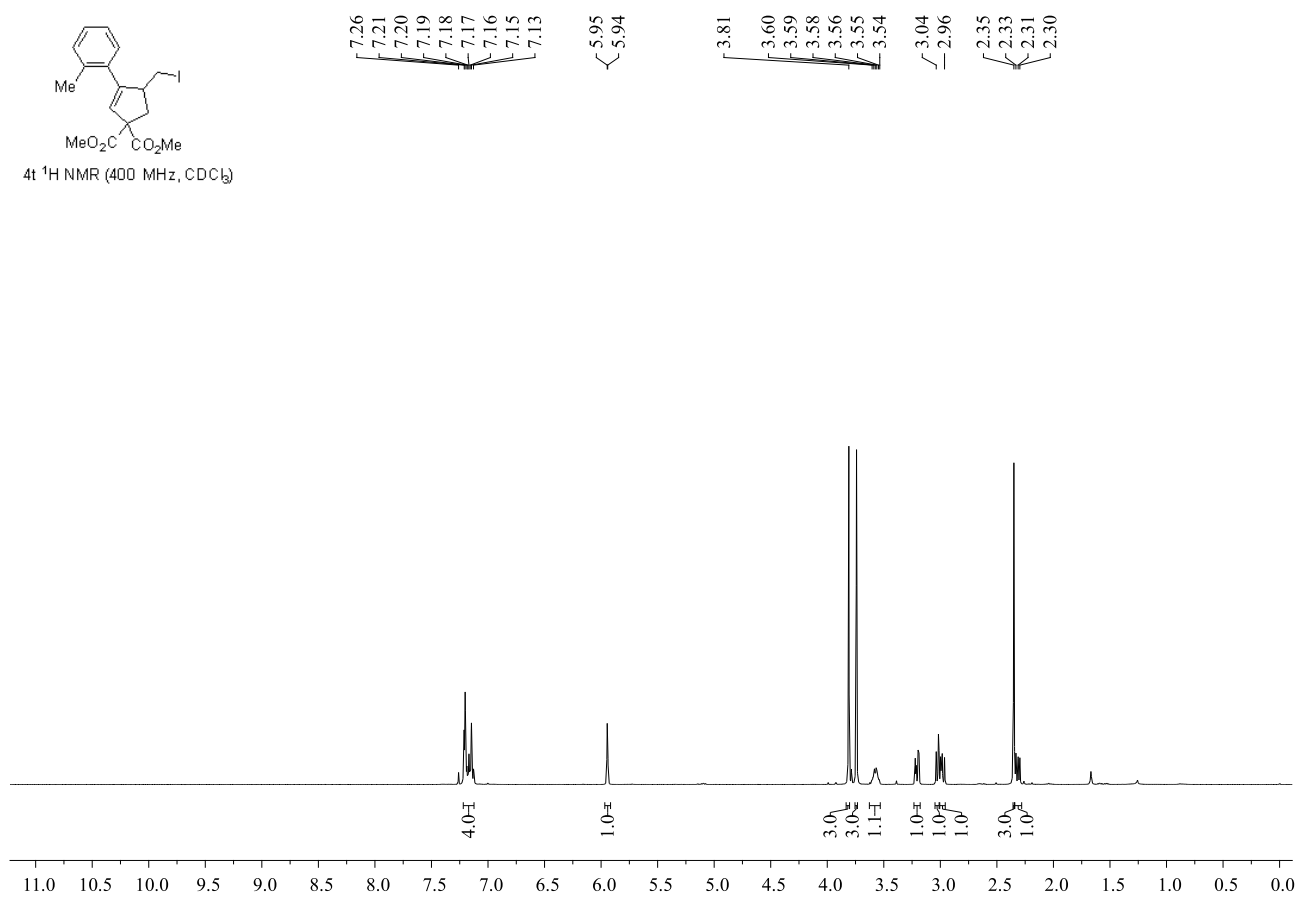

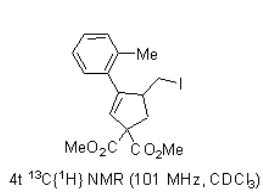

171.25  
 170.92  
 — 148.95  
 135.94  
 134.04  
 130.67  
 128.33  
 128.20  
 127.84  
 125.64

77.32  
 77.00  
 76.68  
 — 64.84  
 52.89  
 52.86  
 49.02  
 — 38.67  
 — 20.38  
 — 11.51

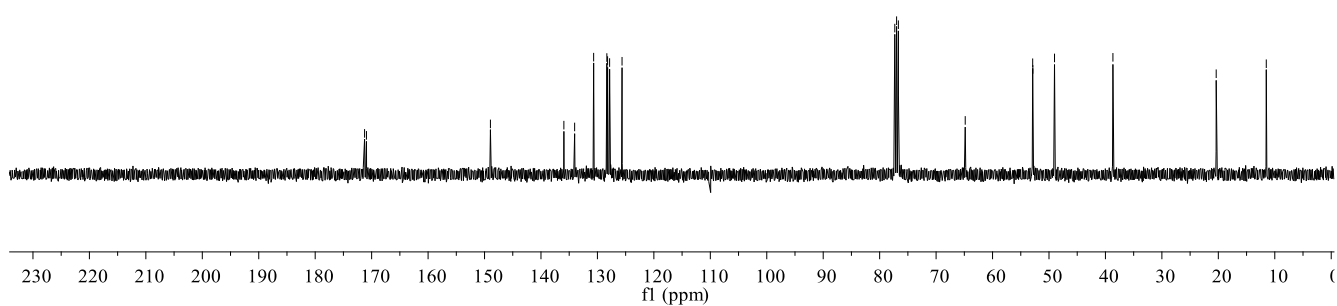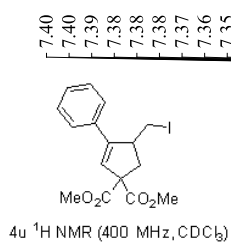

7.40  
 7.40  
 7.39  
 7.38  
 7.38  
 7.37  
 7.36  
 7.35  
 7.34  
 7.34  
 7.33  
 7.32  
 7.32  
 7.32  
 7.31  
 7.30  
 7.30  
 7.29  
 7.29  
 7.26  
 6.23  
 6.22  
 3.80  
 3.69  
 3.68  
 3.67  
 3.66  
 3.66  
 3.65  
 3.64  
 3.40  
 3.12  
 2.90  
 2.53  
 2.52  
 2.49  
 2.48

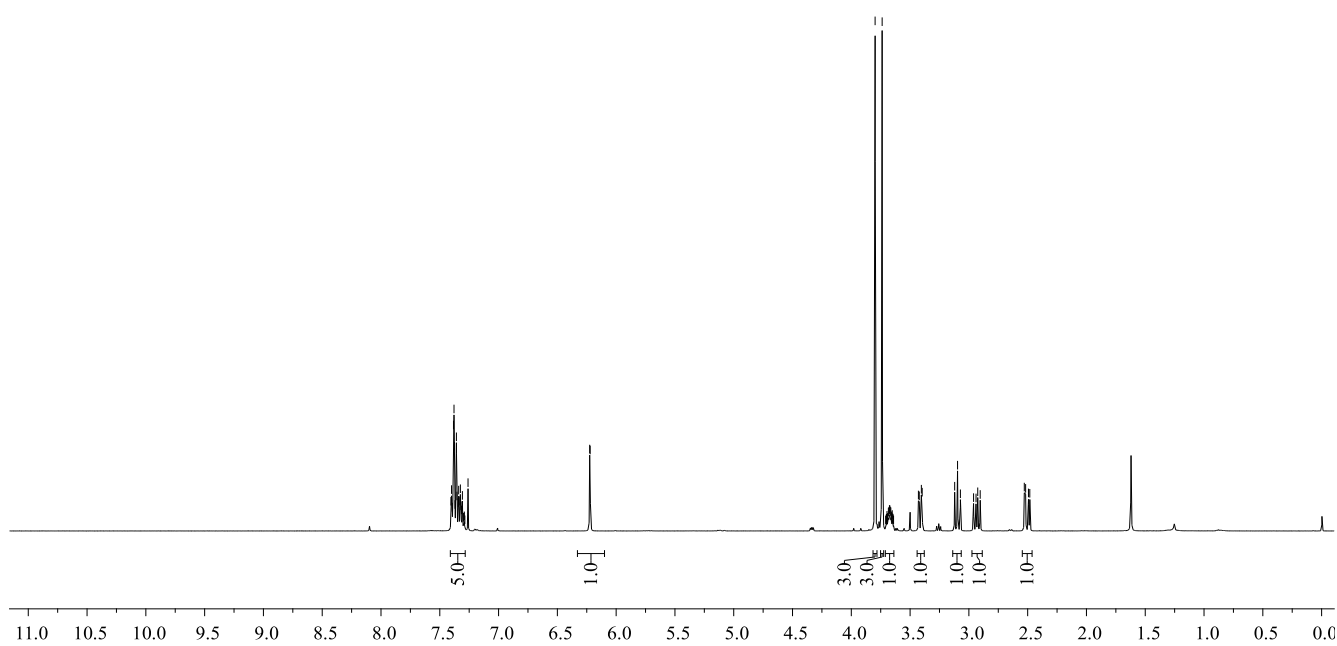

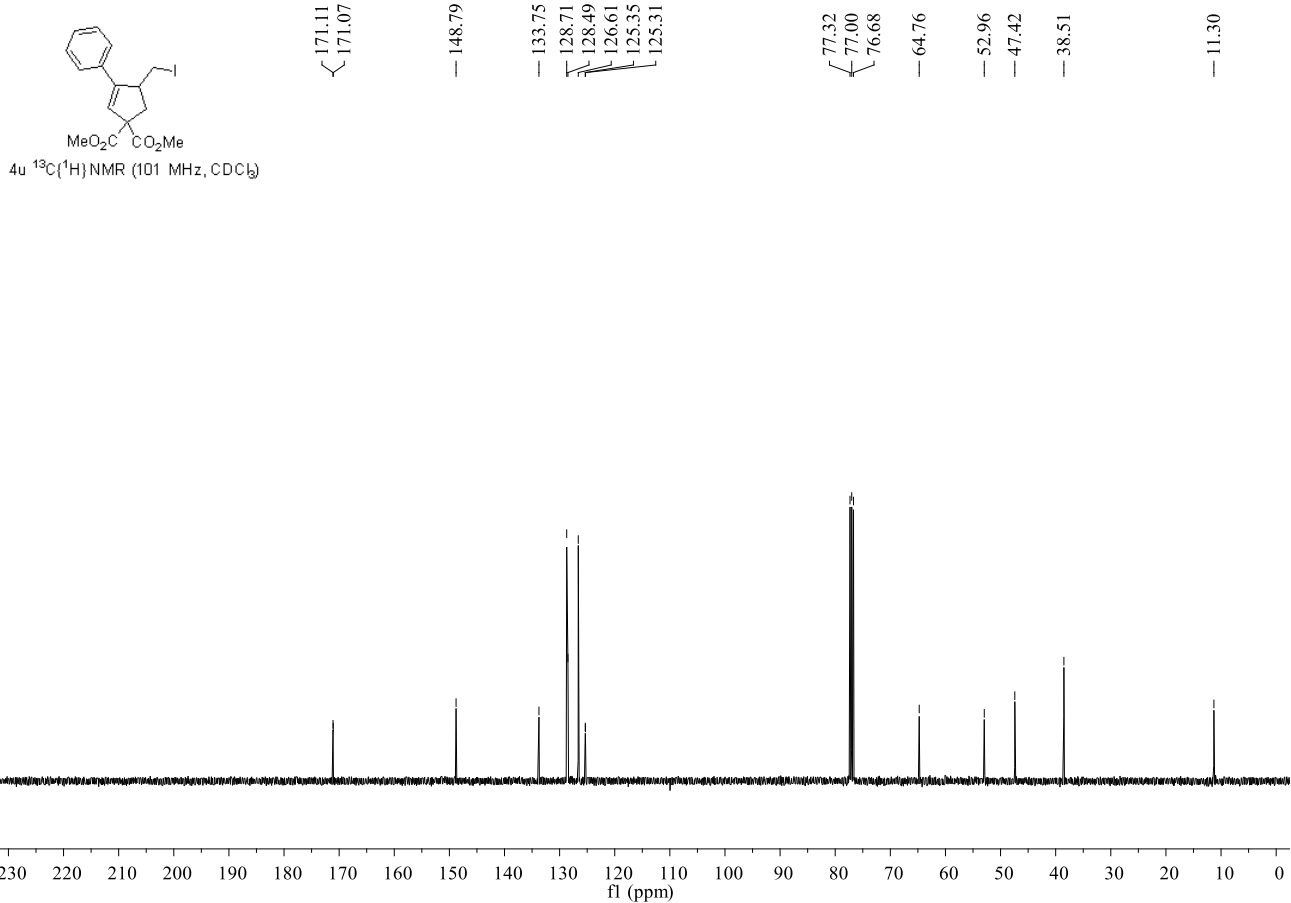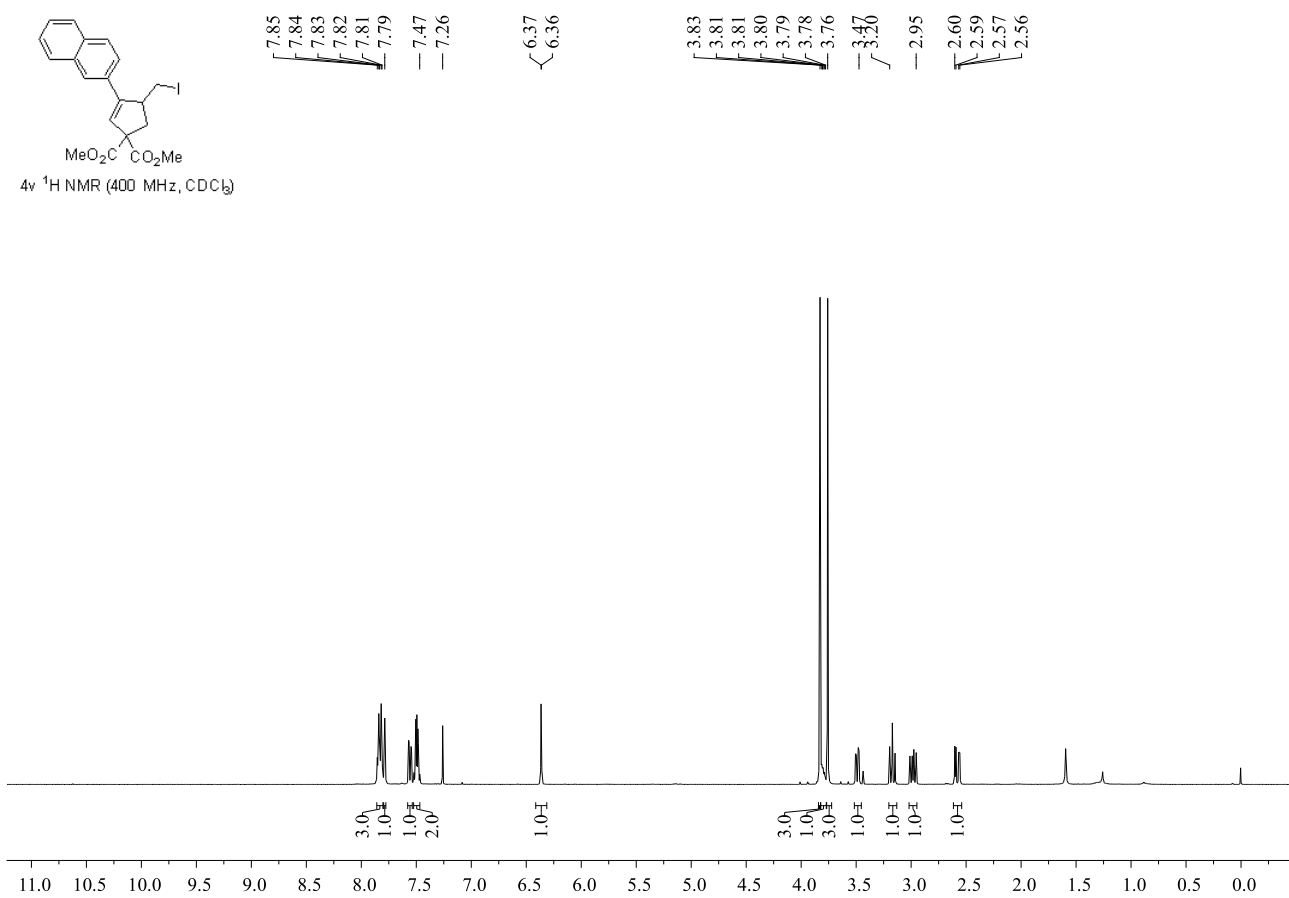

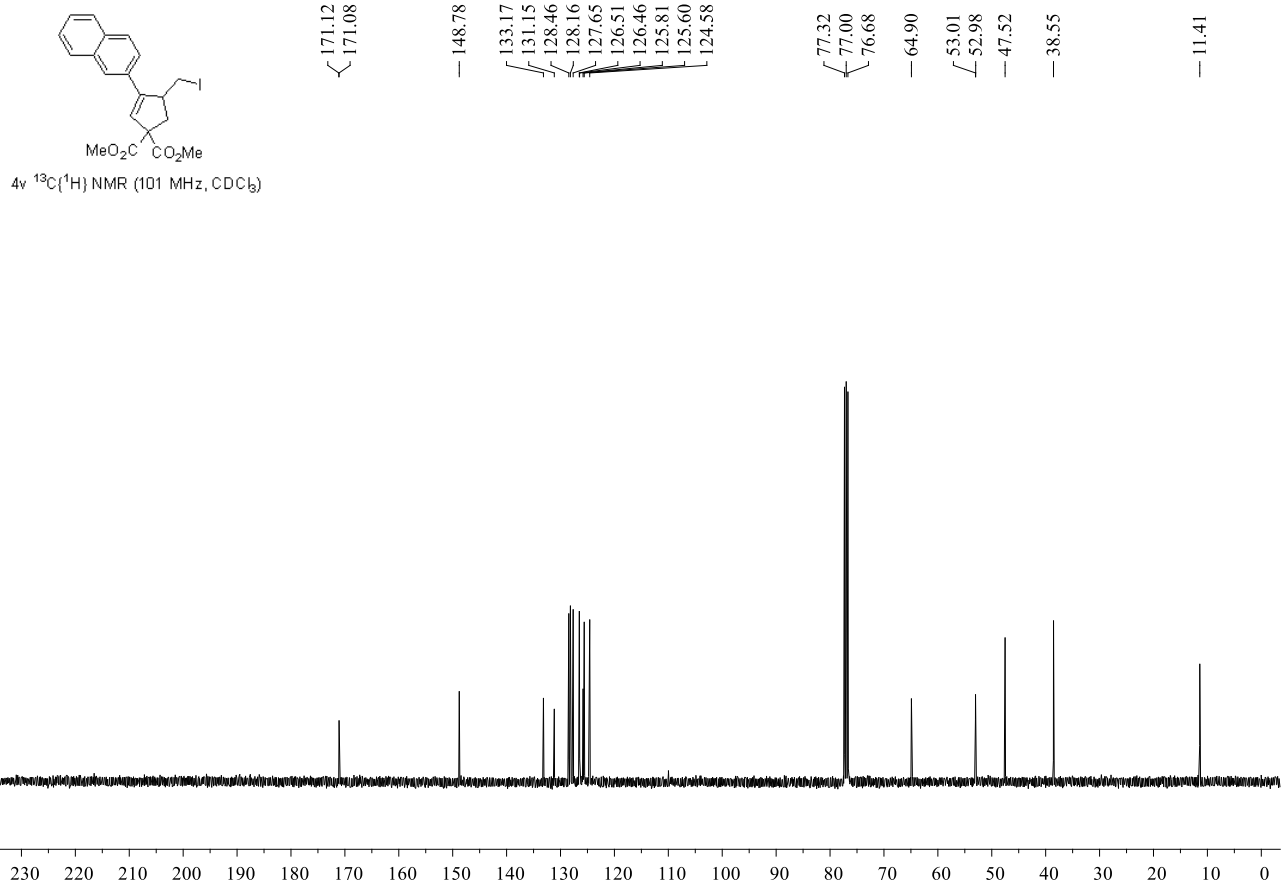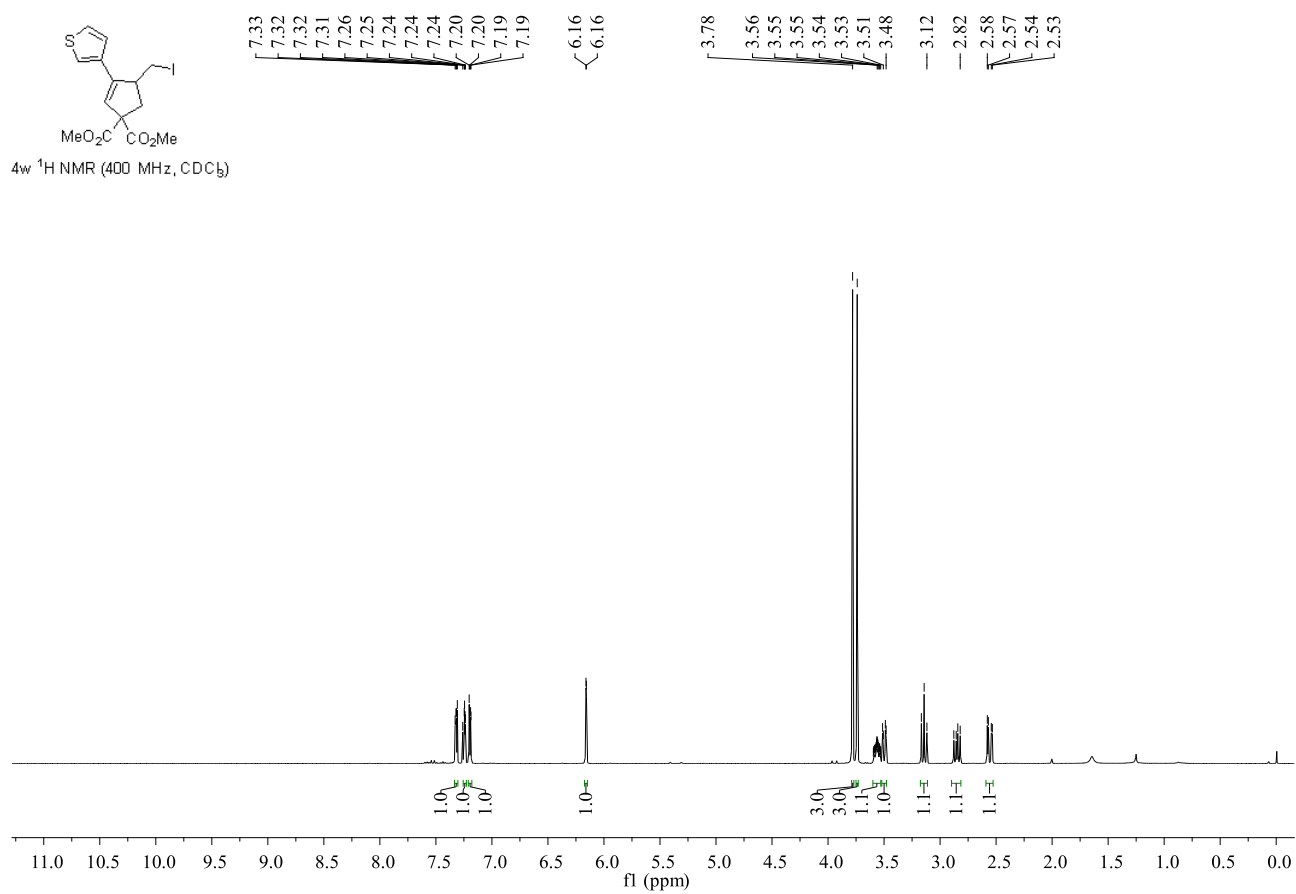



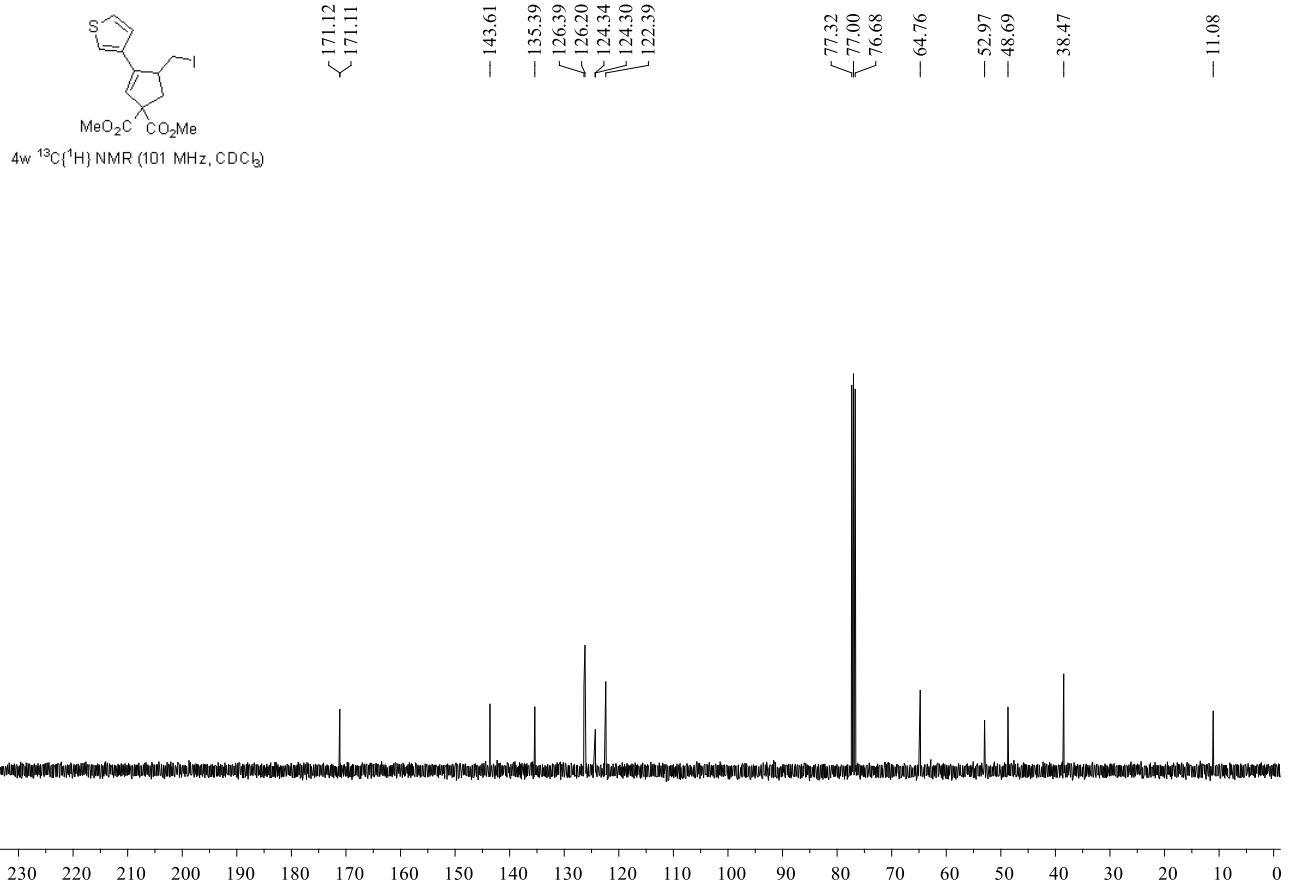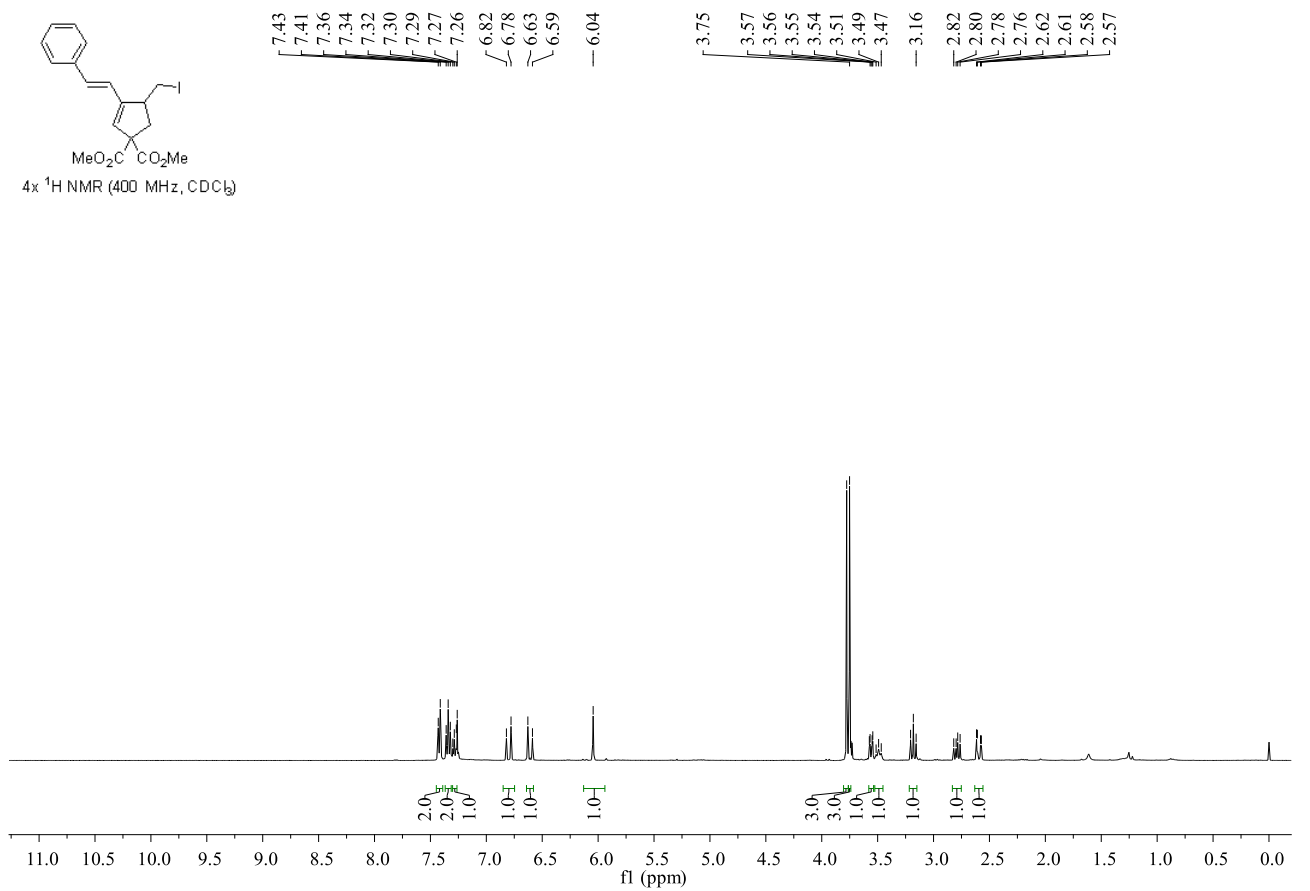

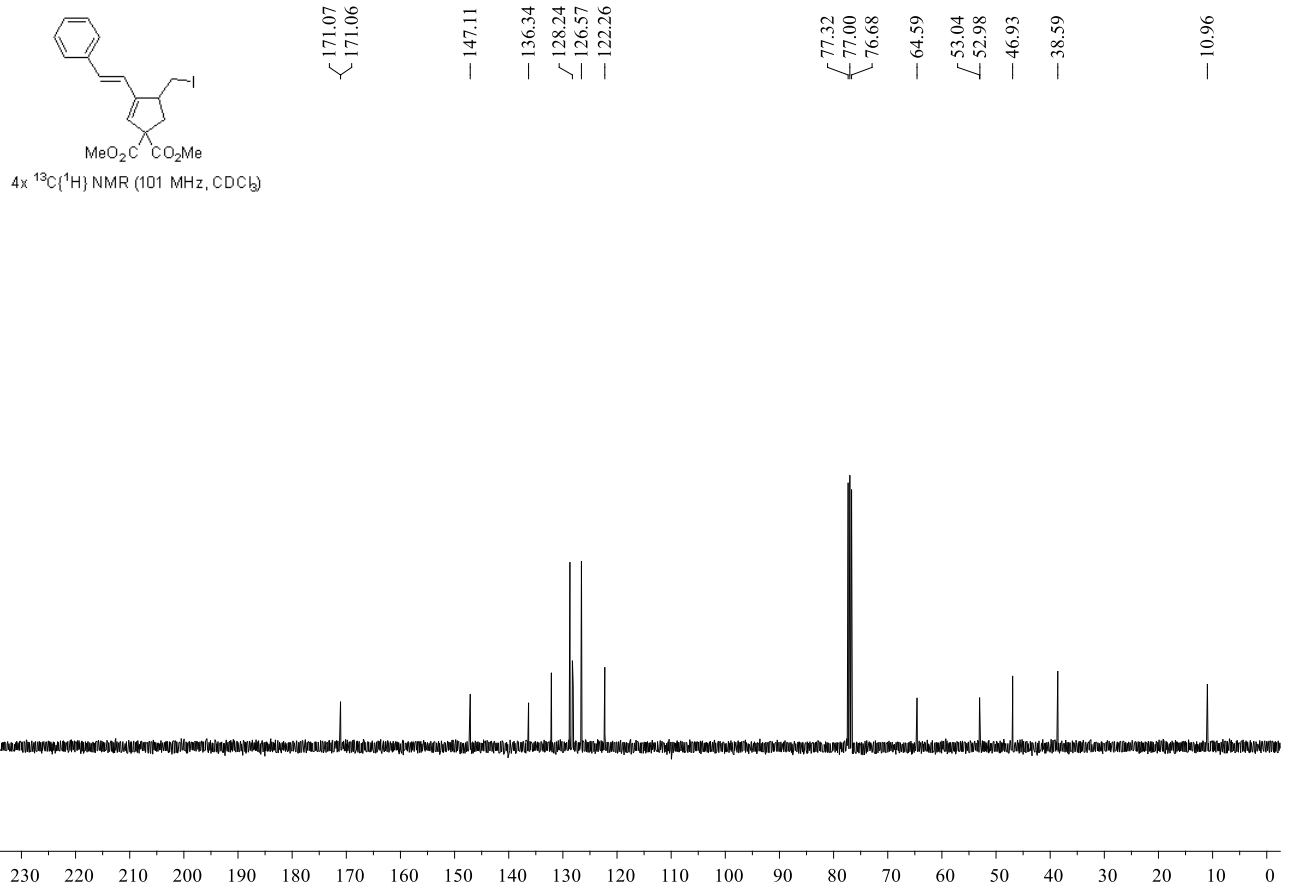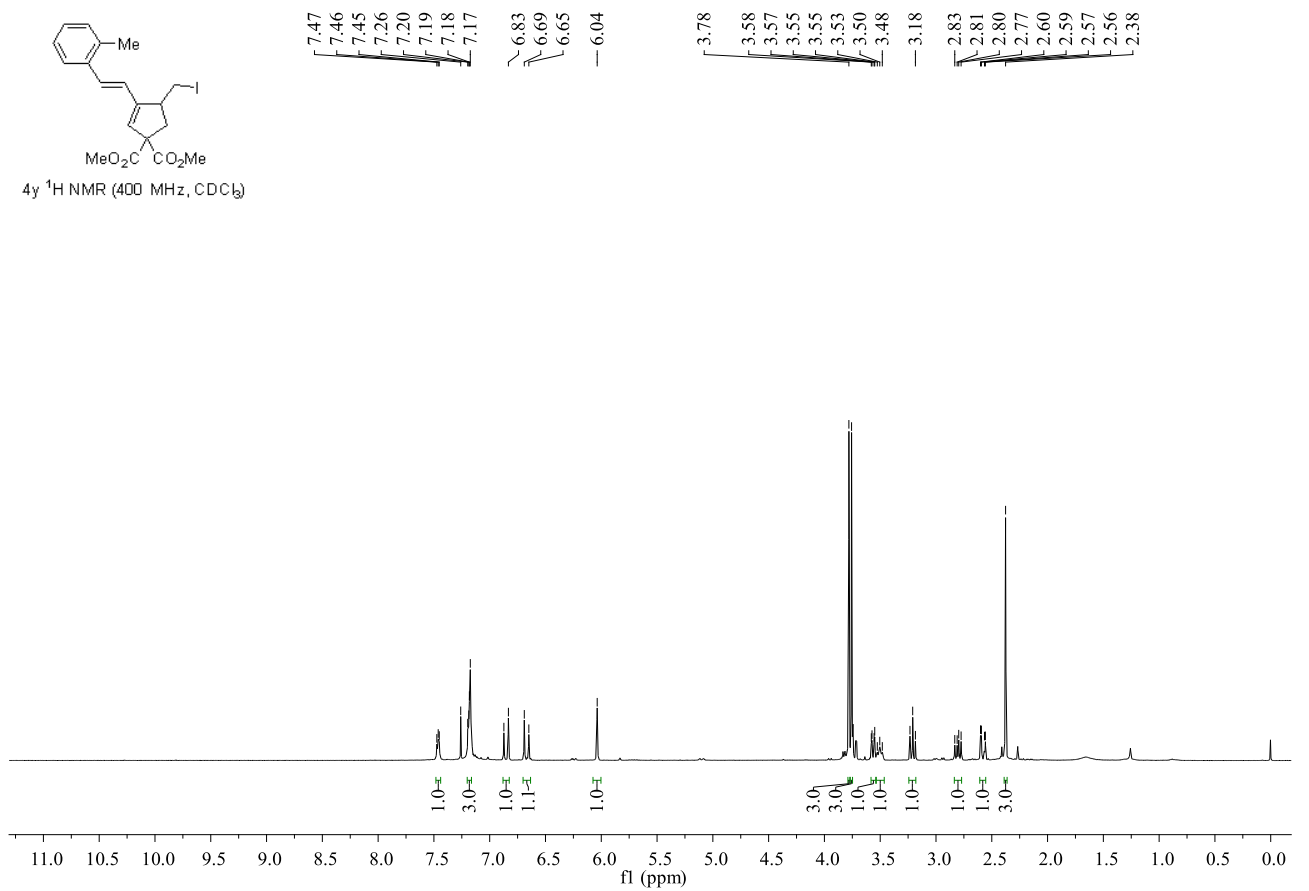

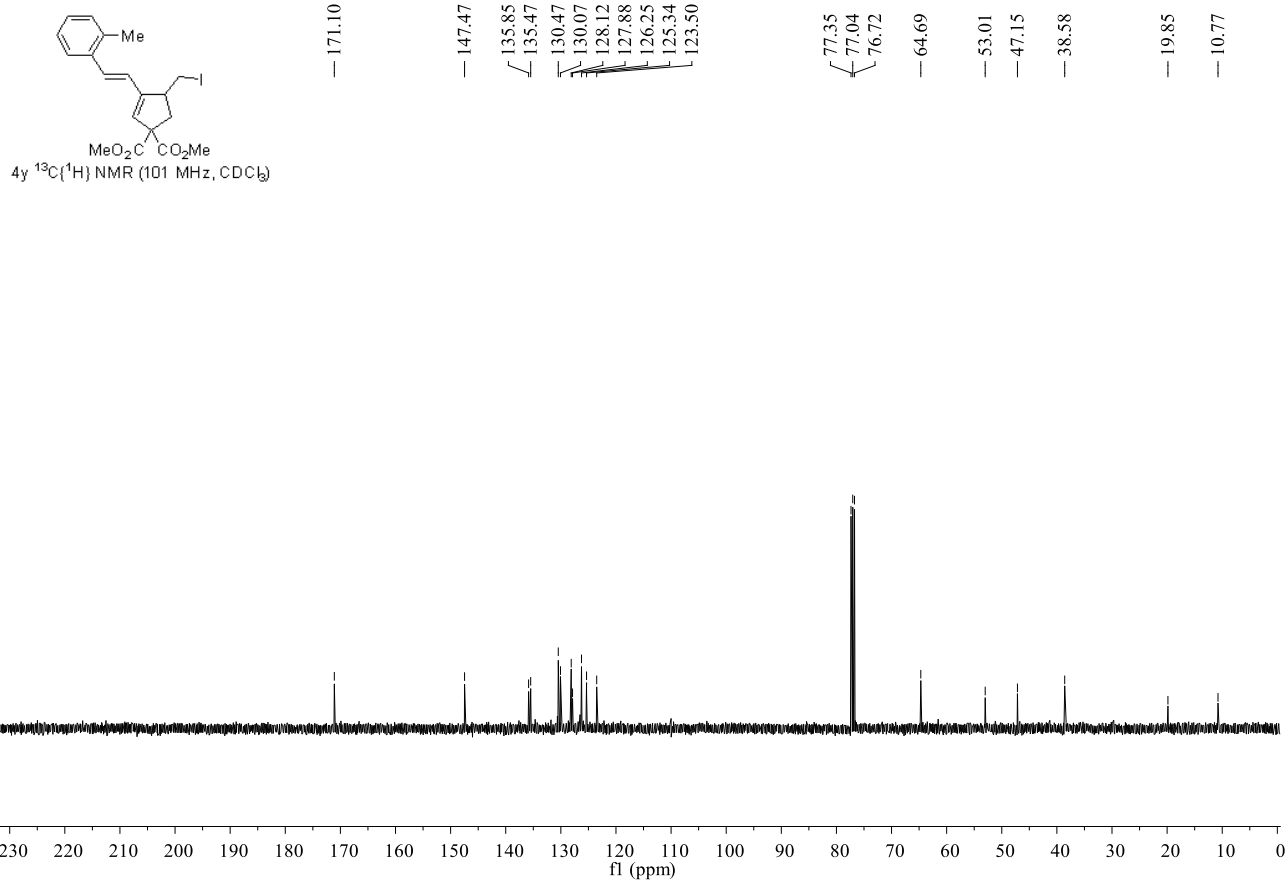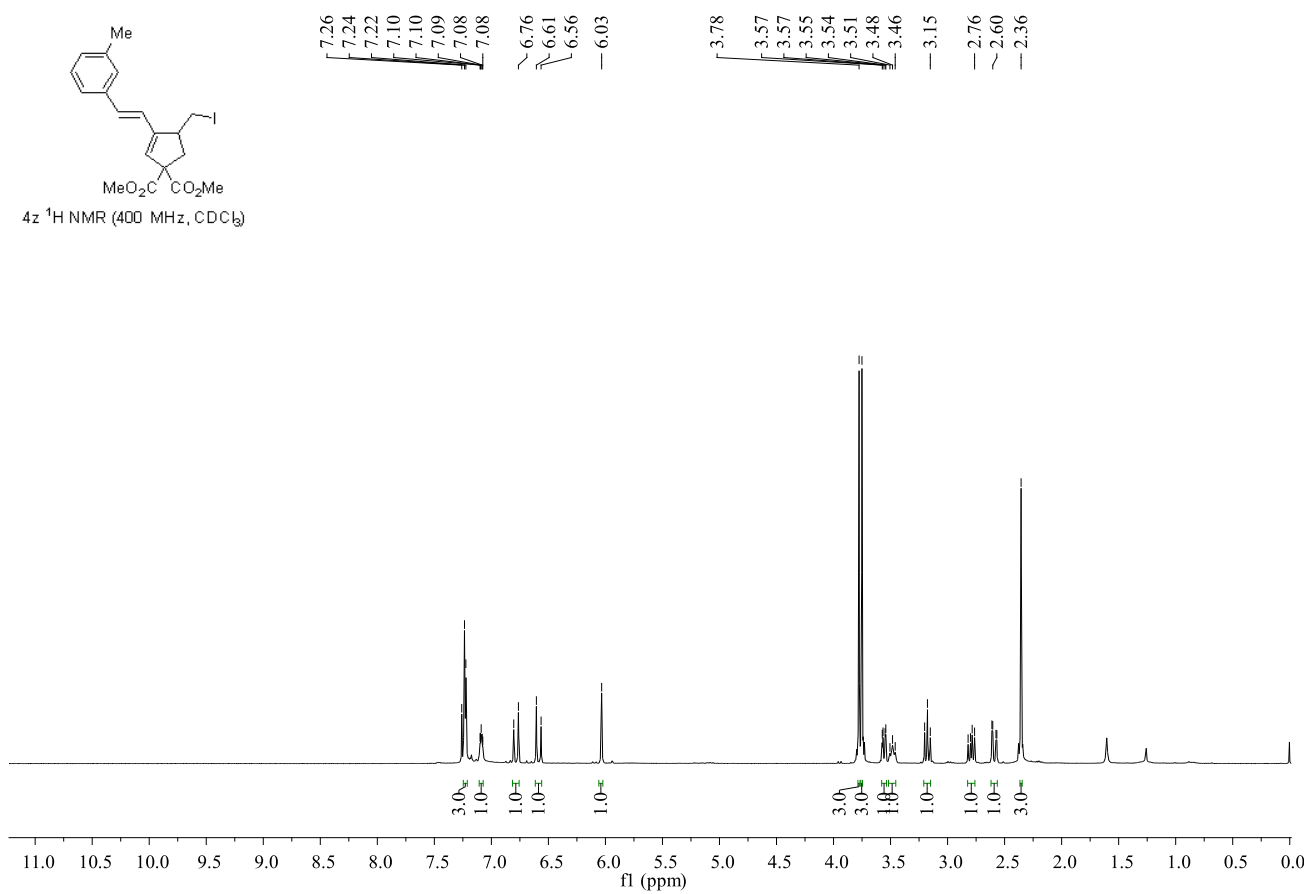

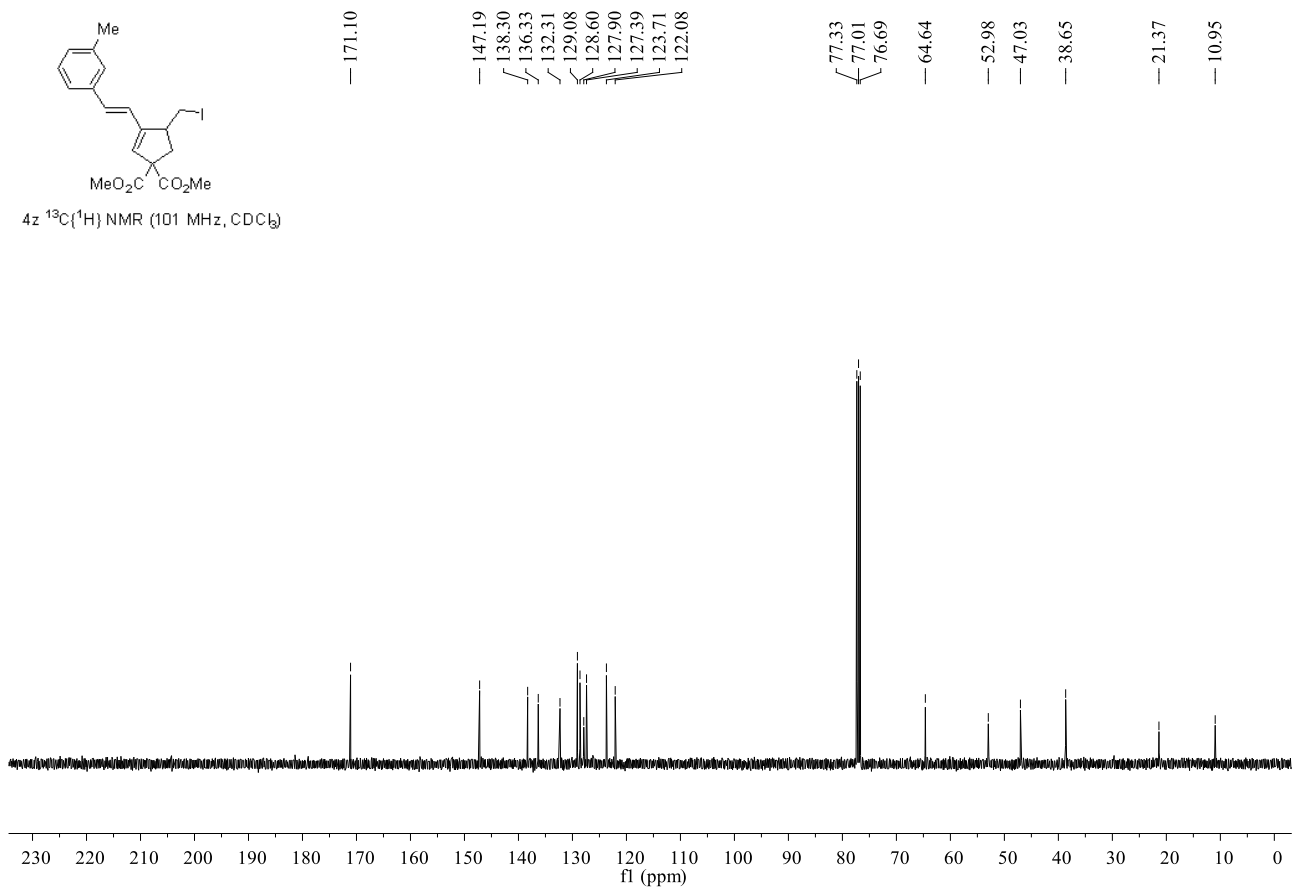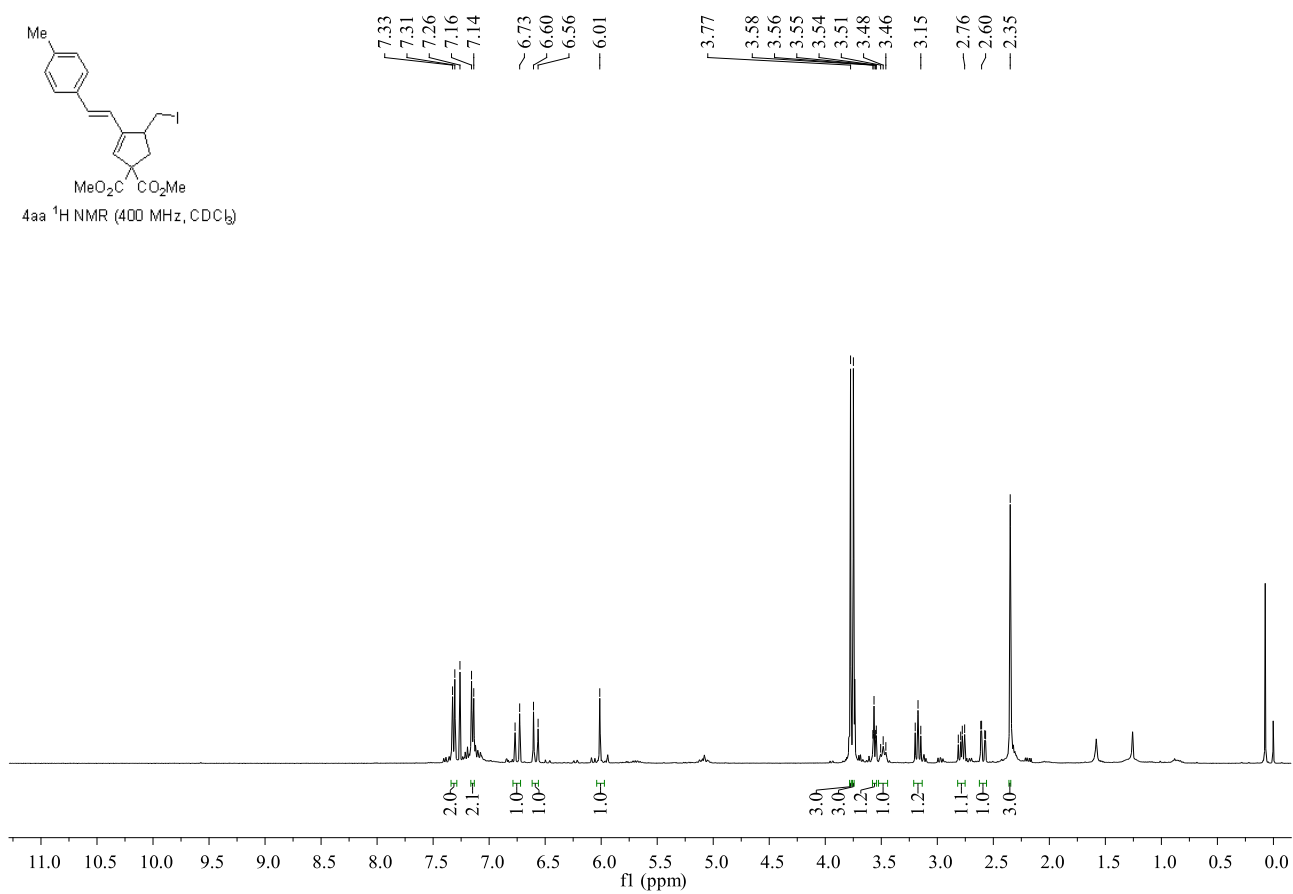

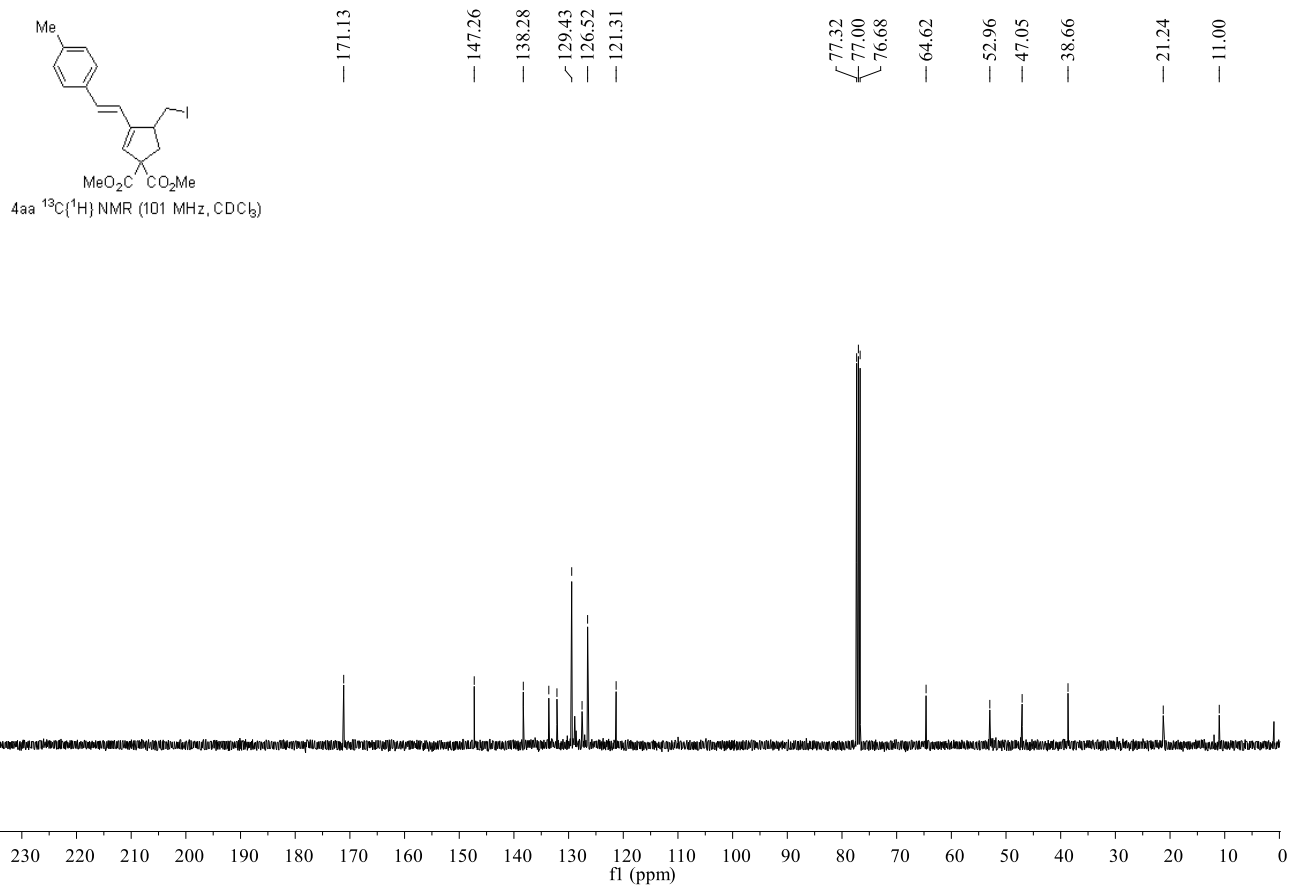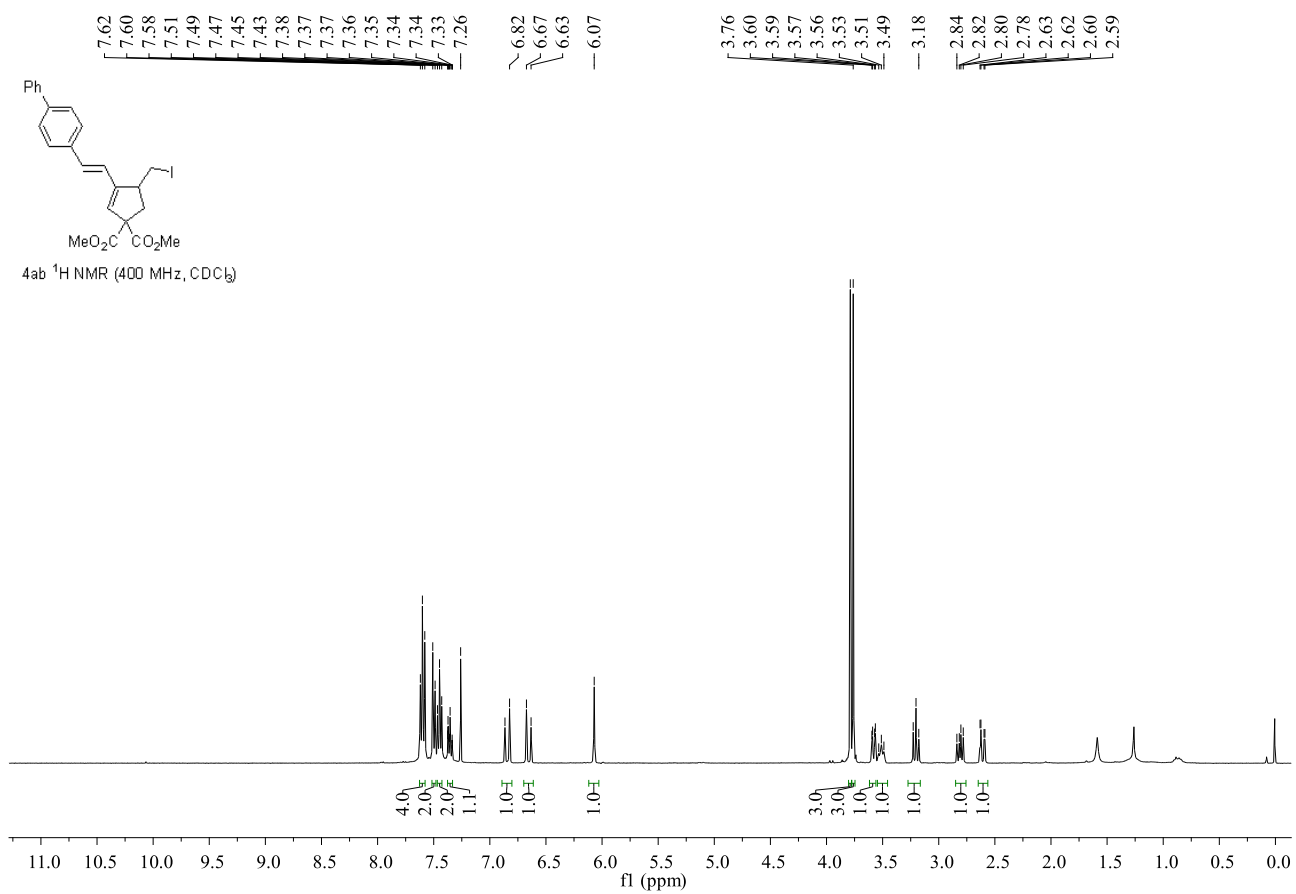

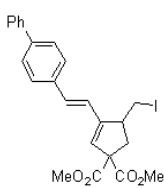

4ab  $^{13}\text{C}\{^1\text{H}\}$  NMR (101 MHz,  $\text{CDCl}_3$ )

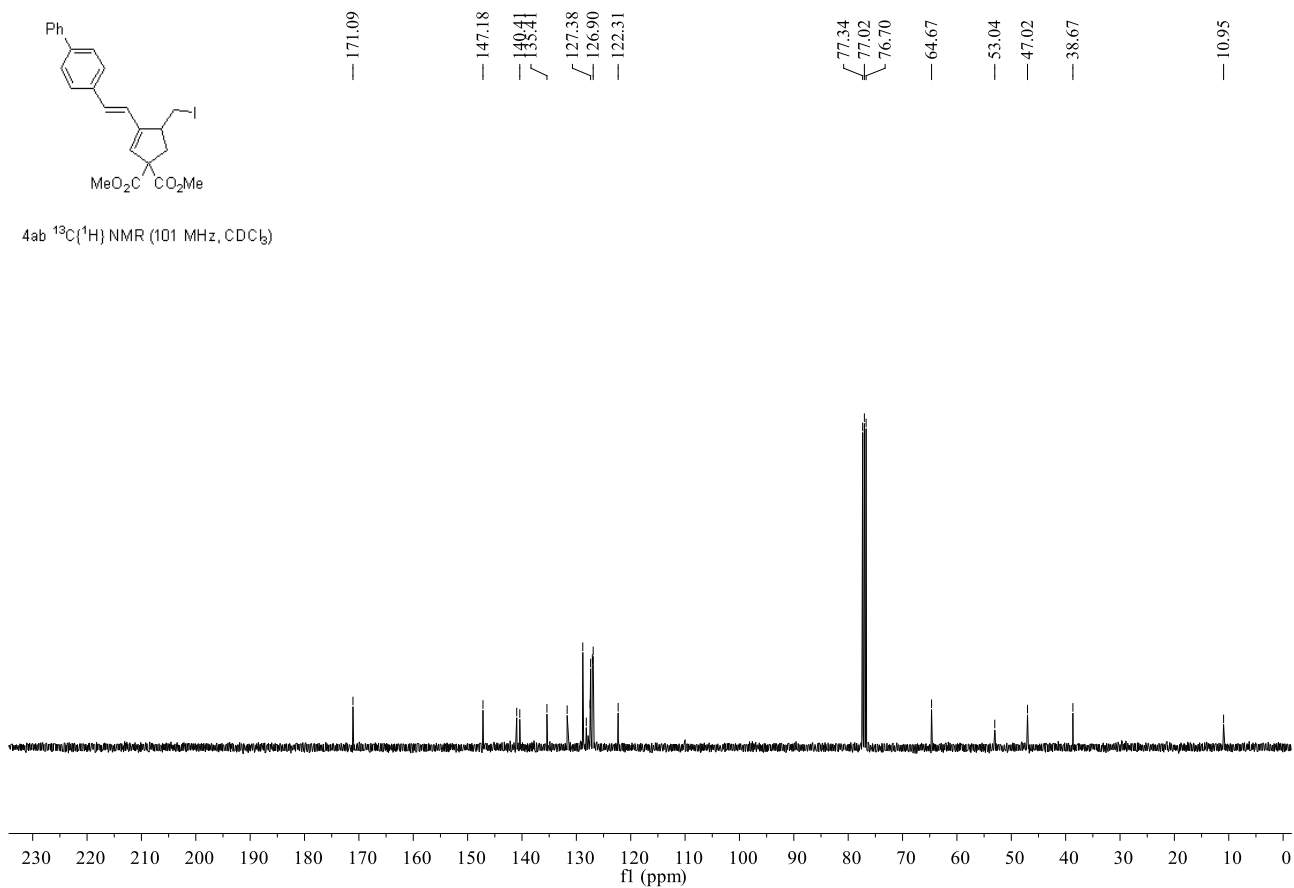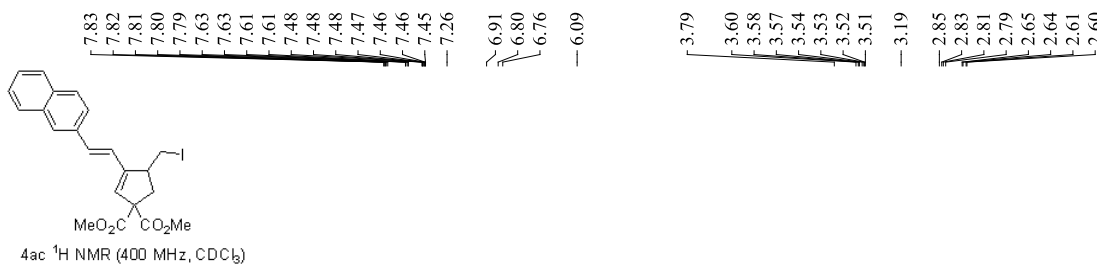

4ac  $^1\text{H}$  NMR (400 MHz,  $\text{CDCl}_3$ )

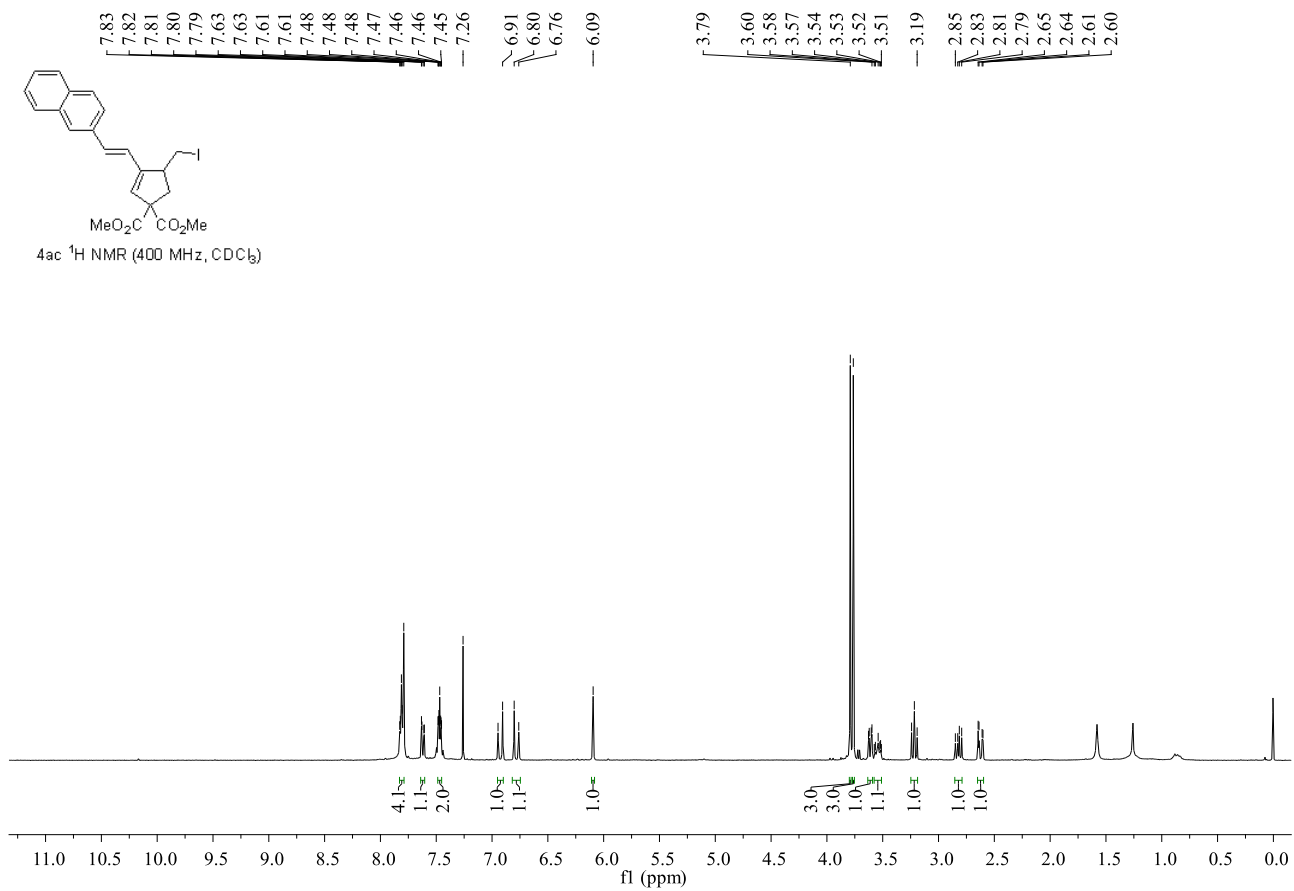

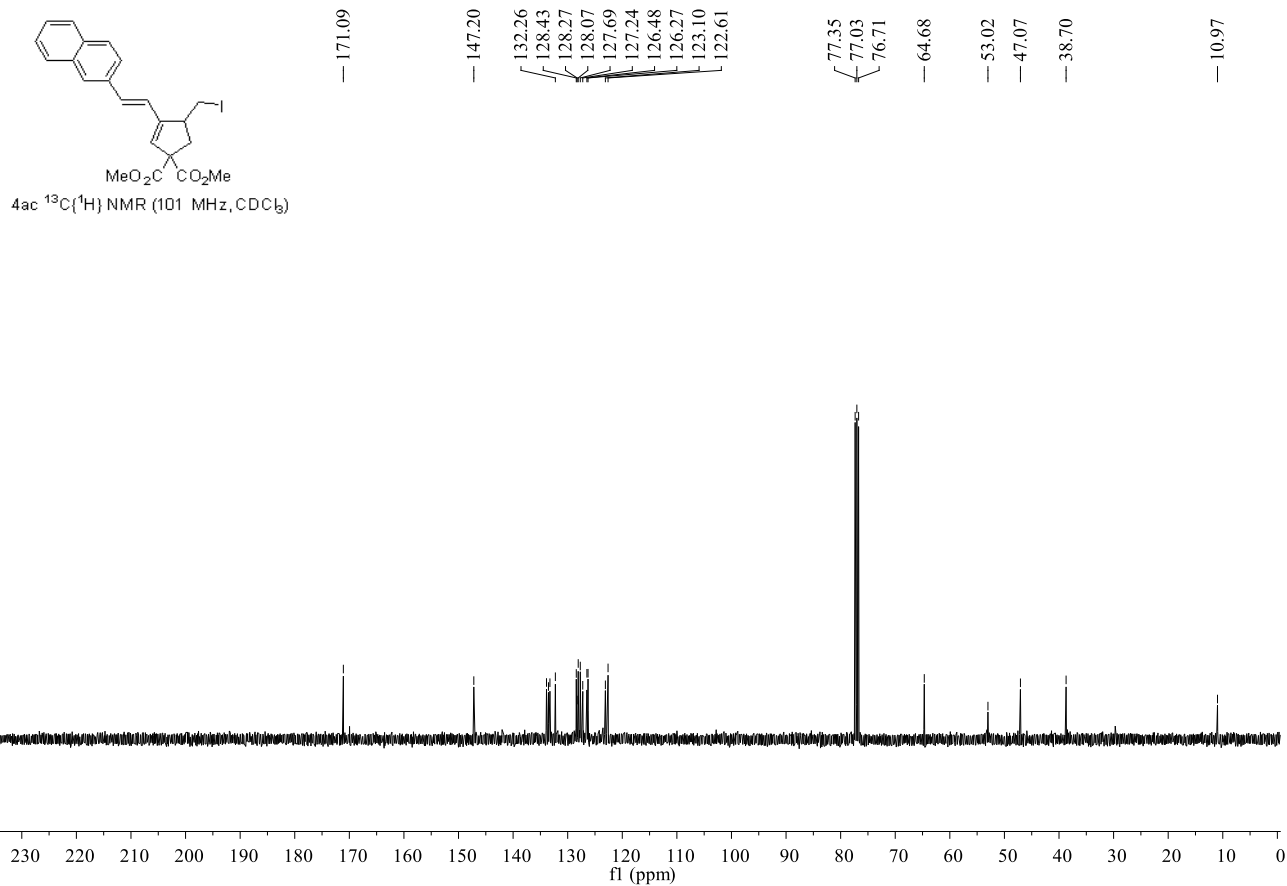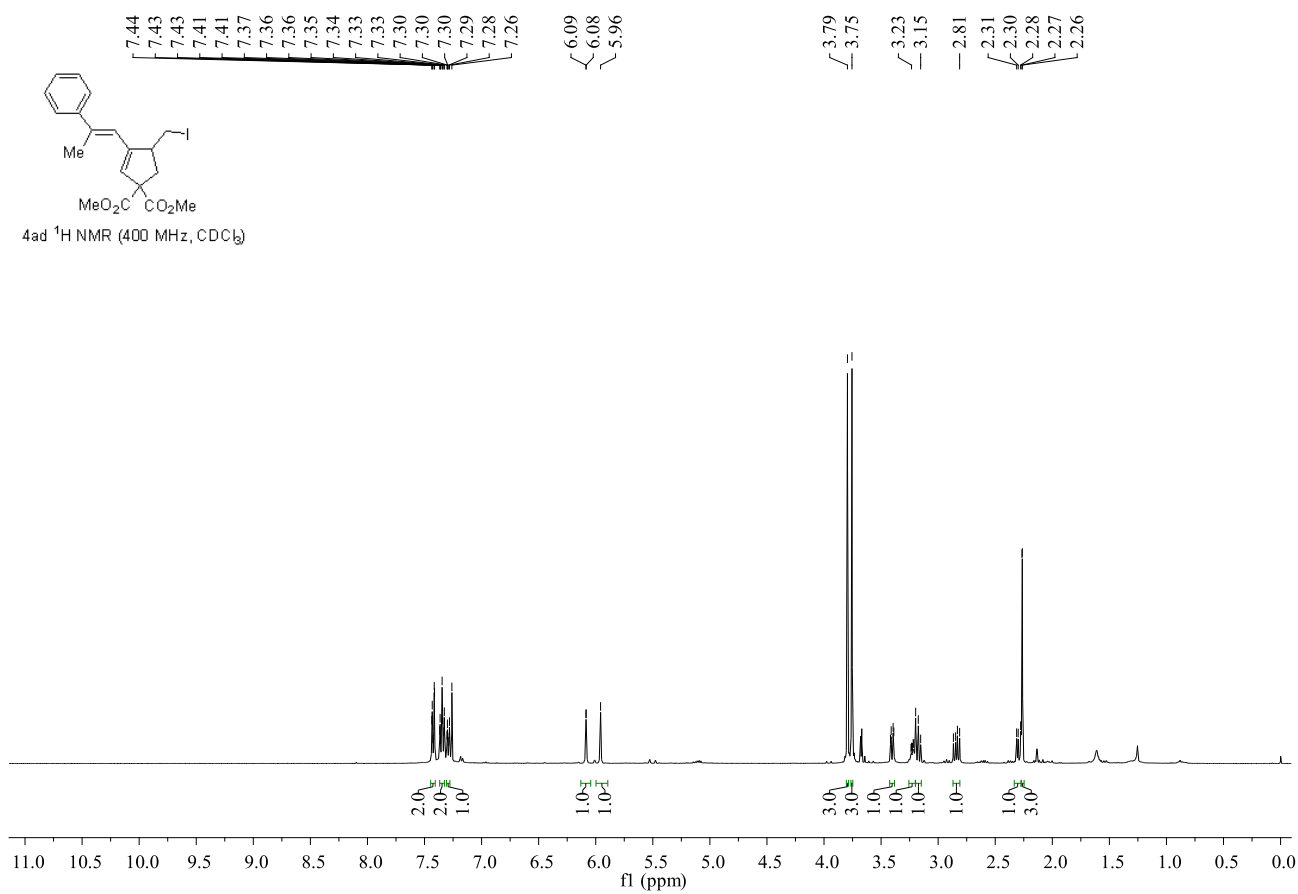

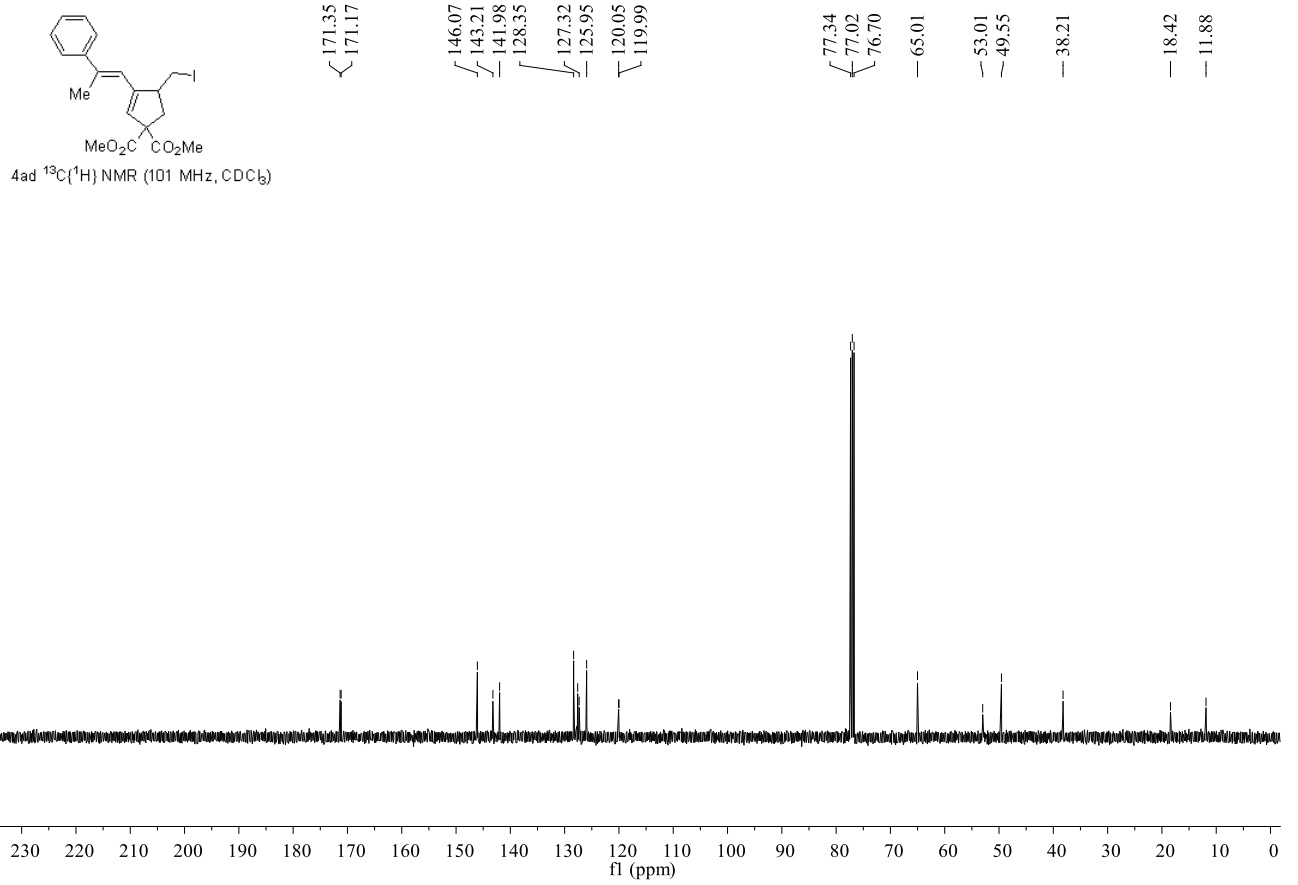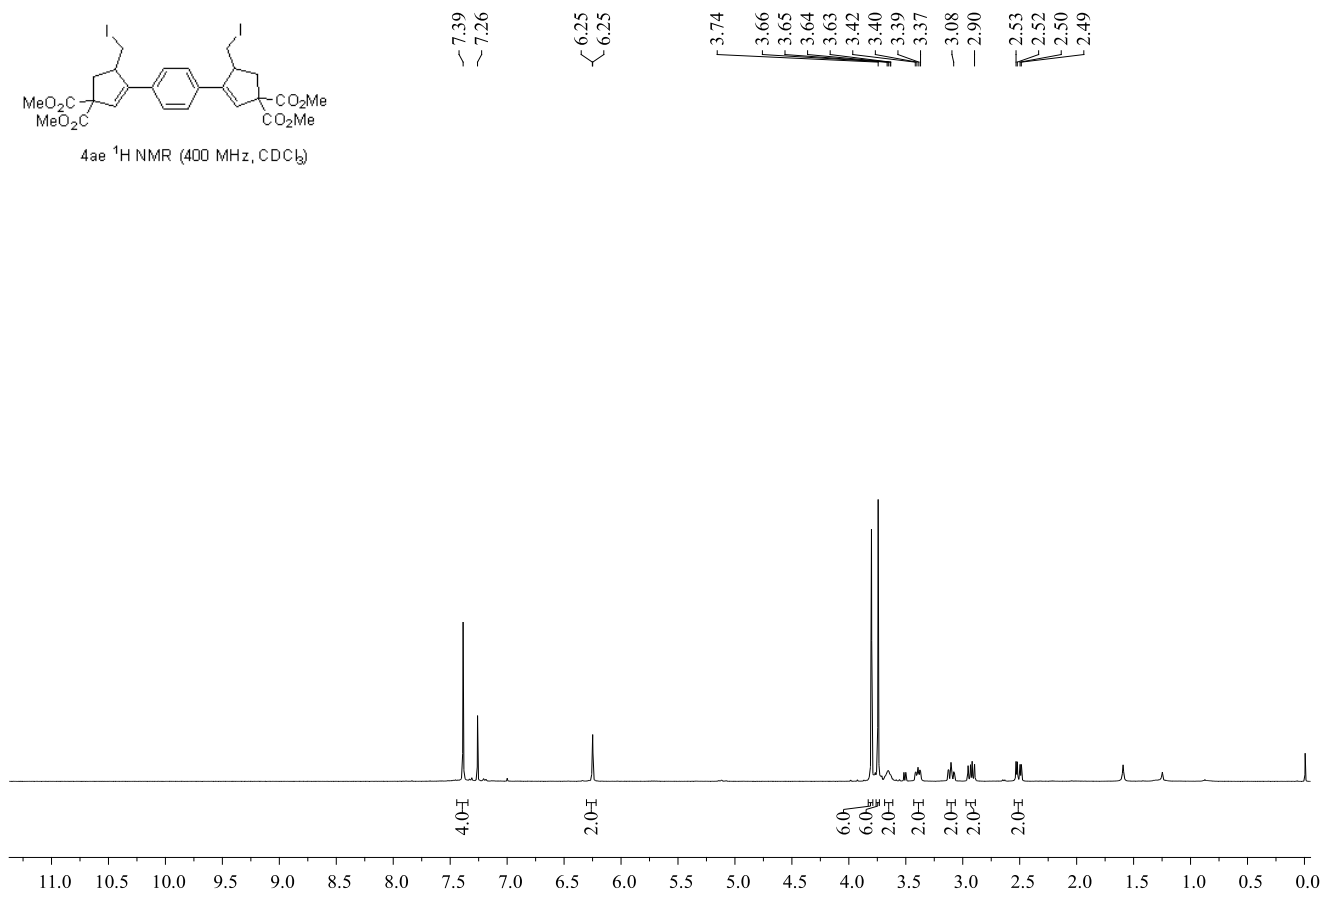



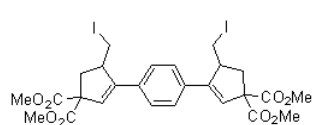

$^{13}\text{C}\{^1\text{H}\}$  NMR (101 MHz,  $\text{CDCl}_3$ )

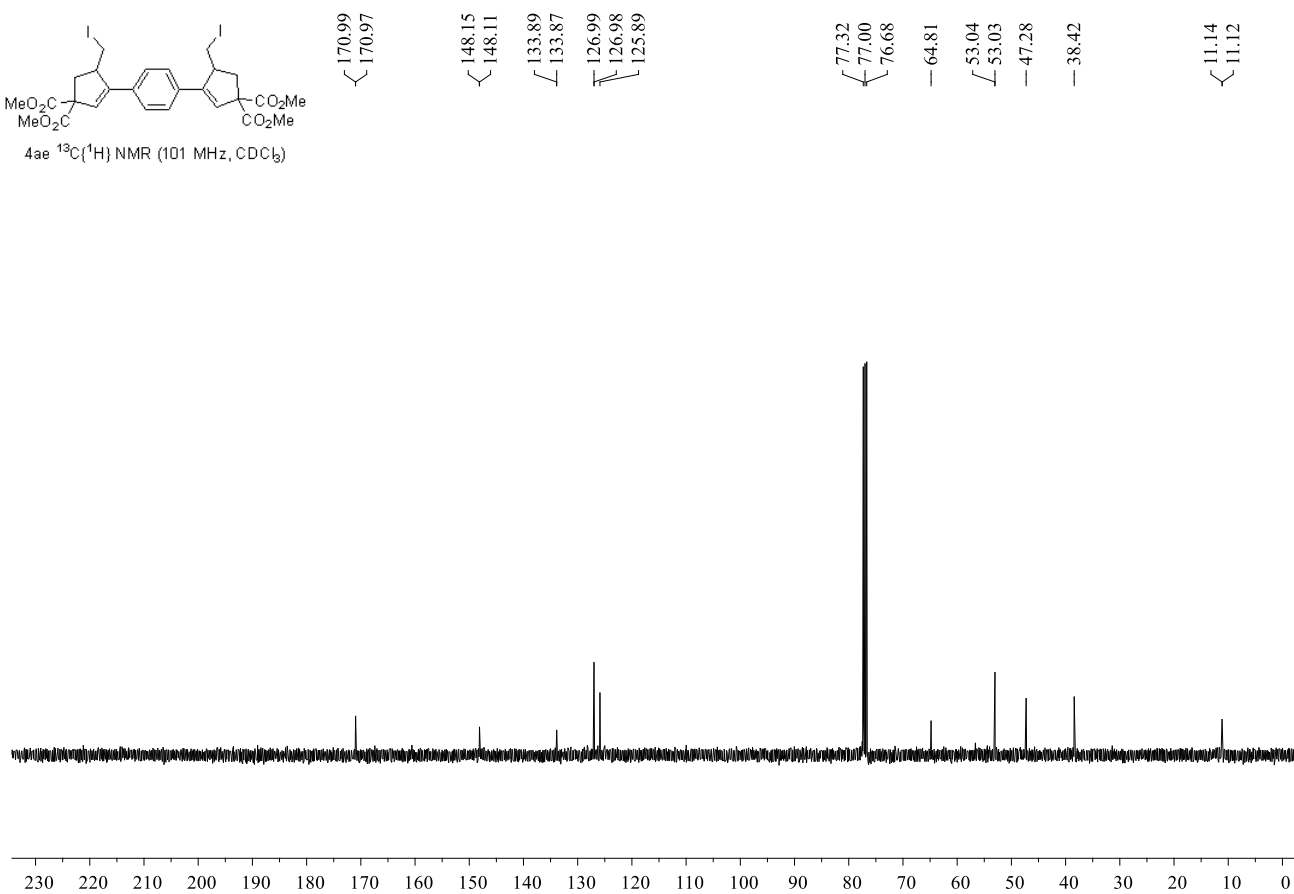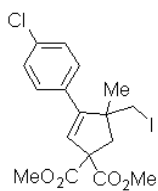

$^1\text{H}$  NMR (400 MHz,  $\text{CDCl}_3$ )

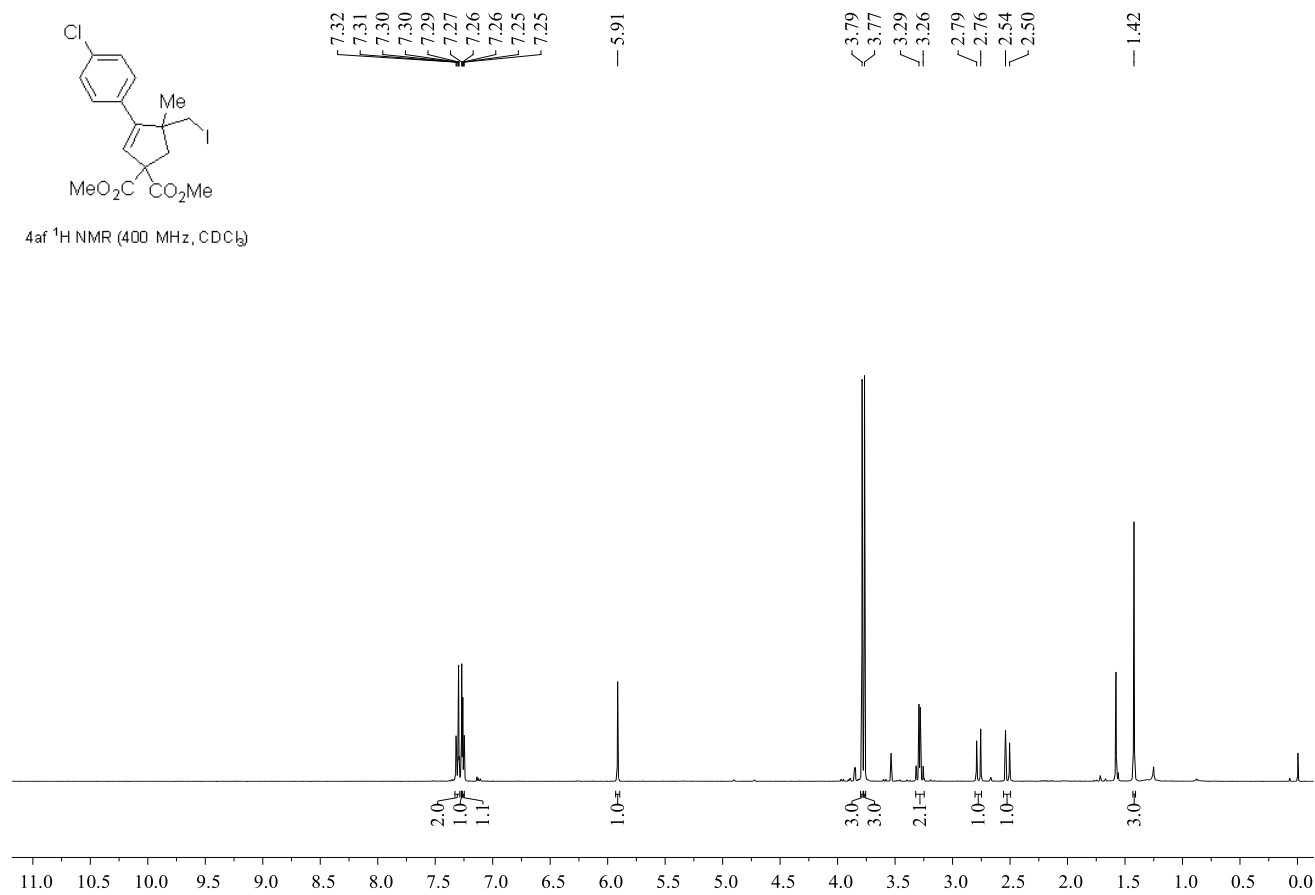

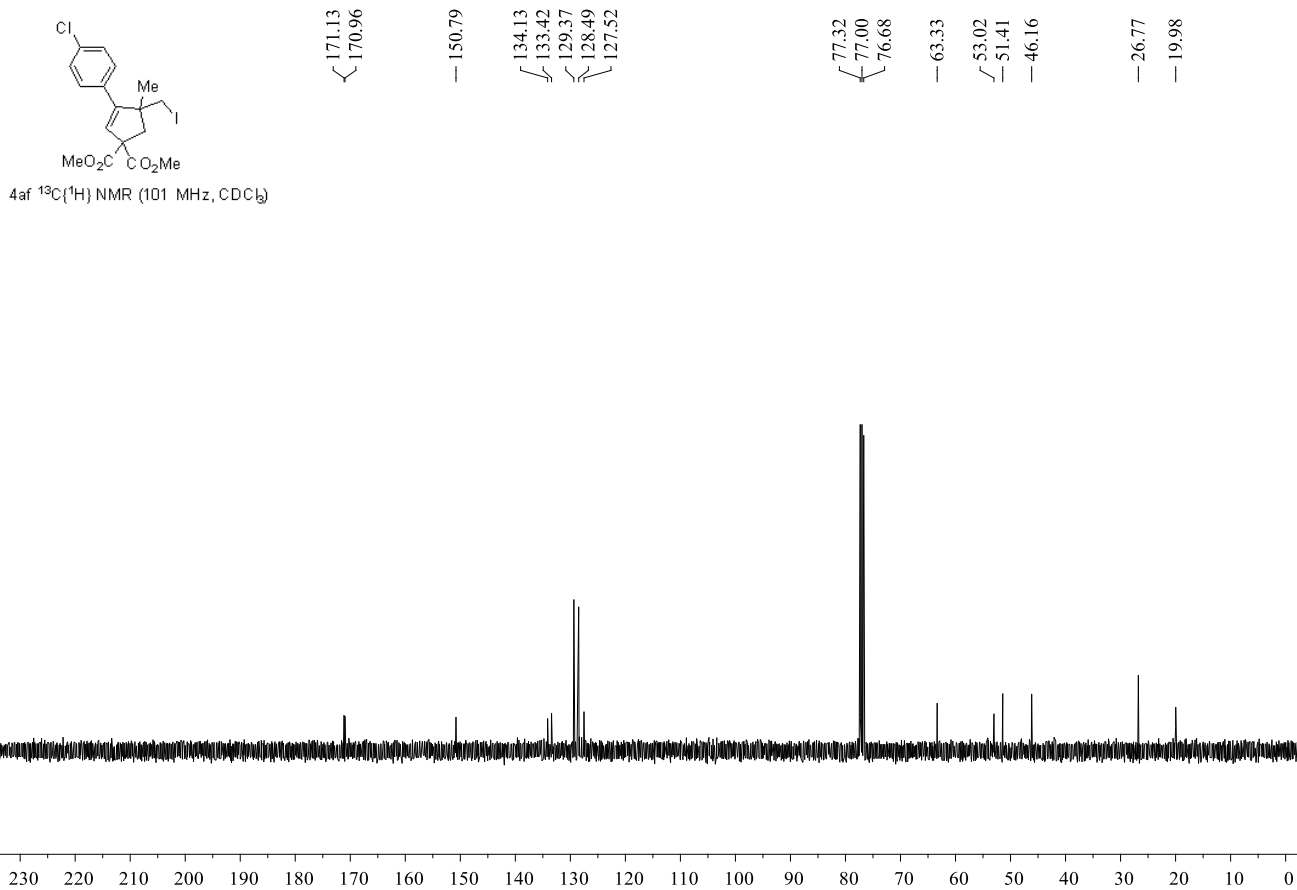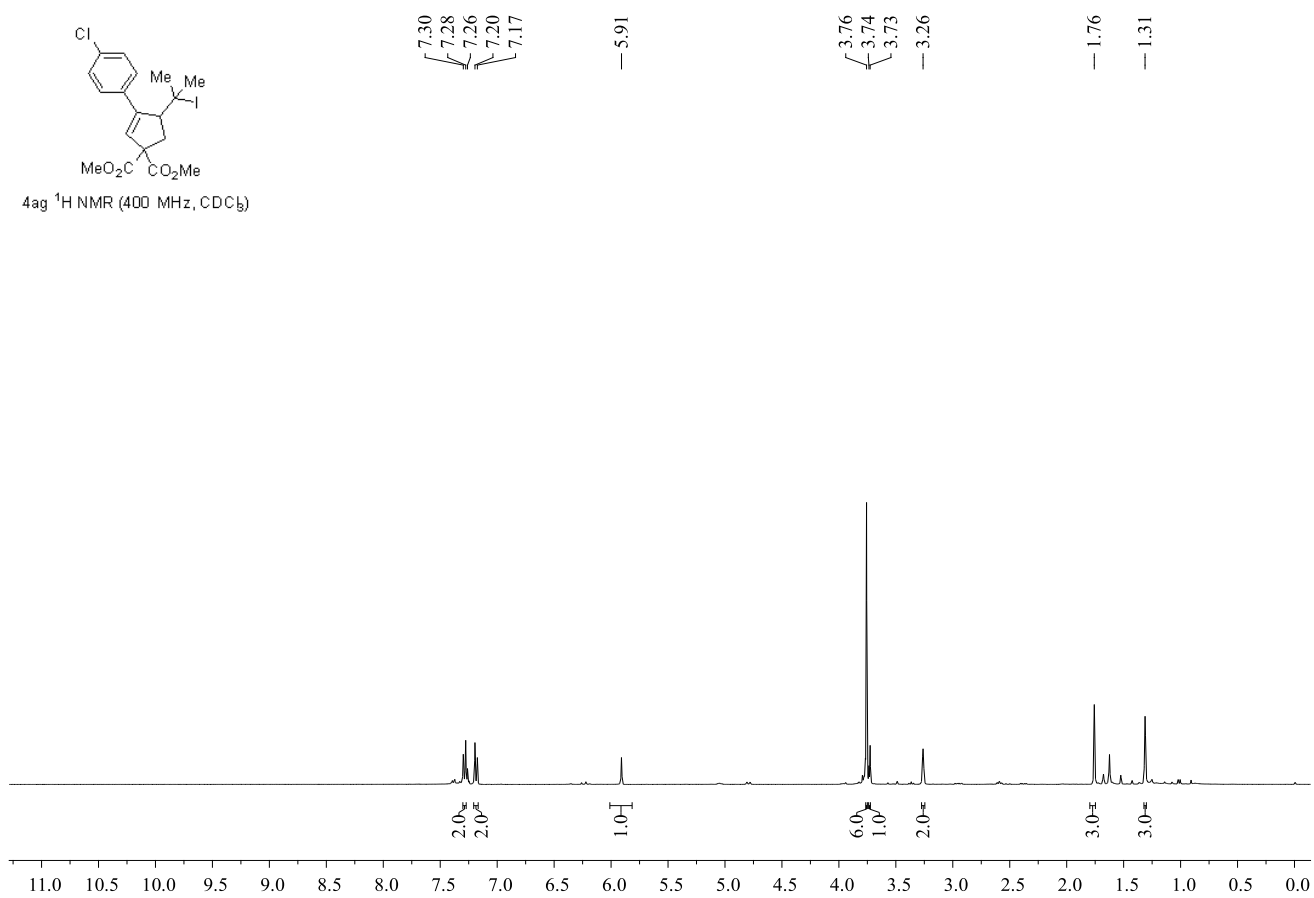

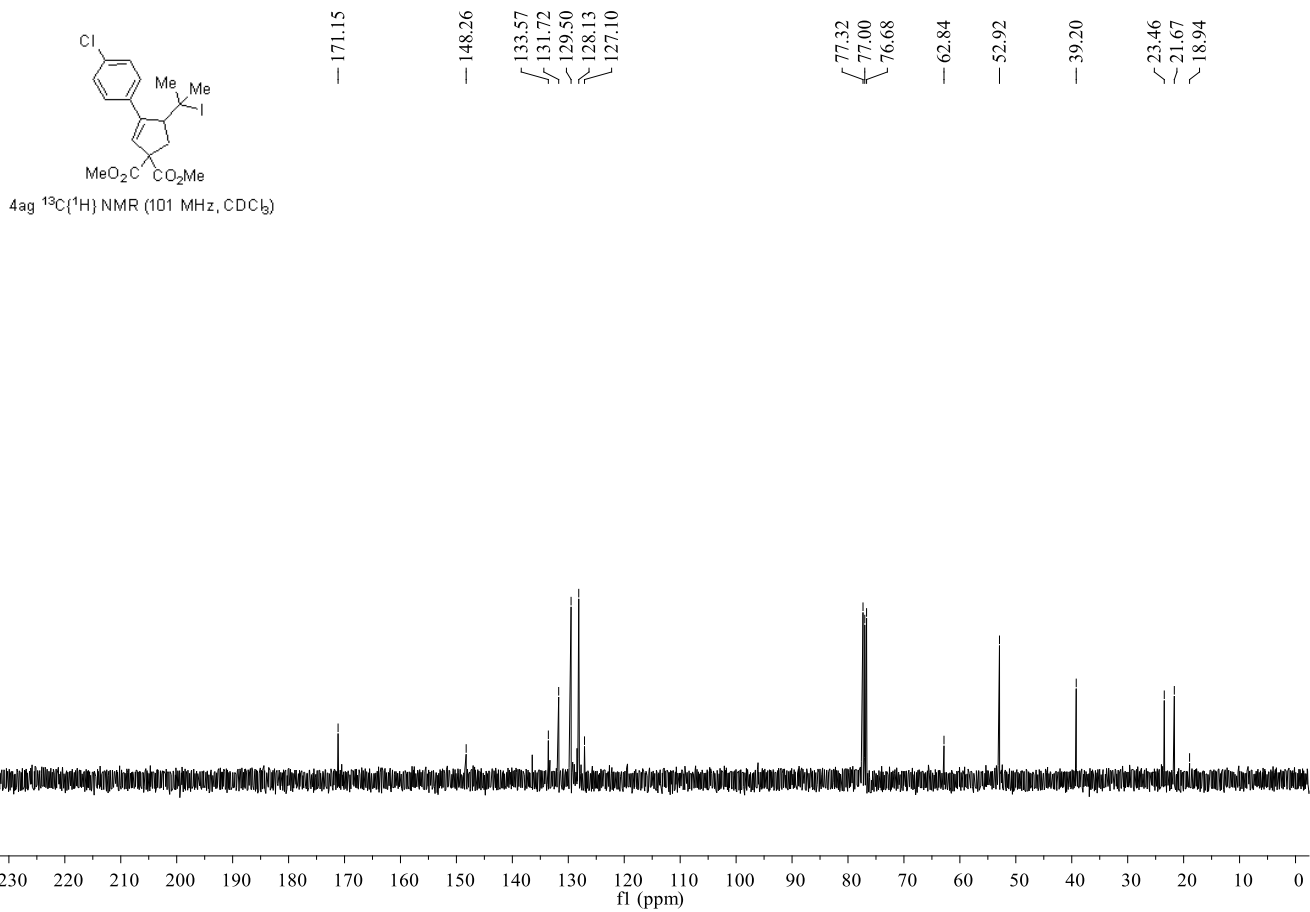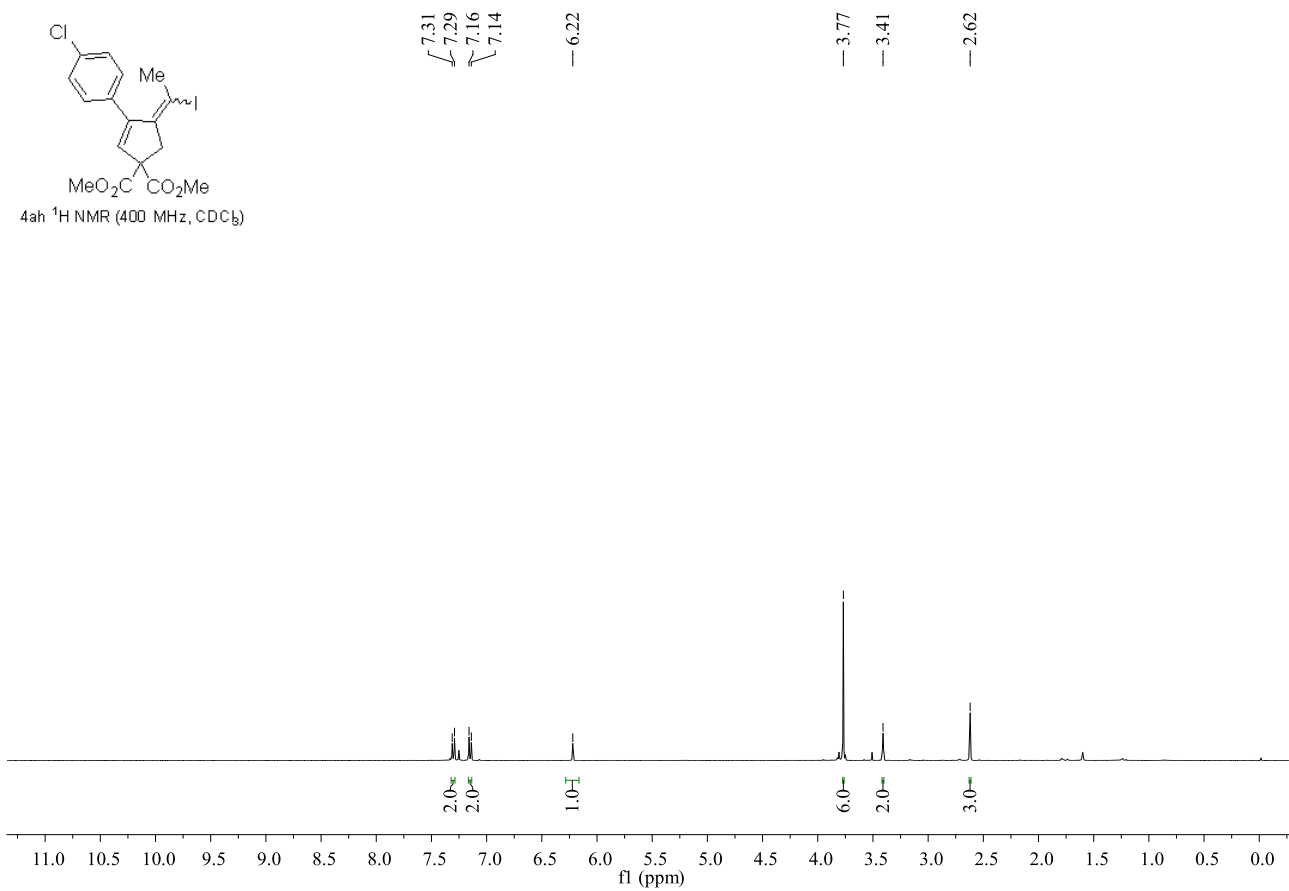

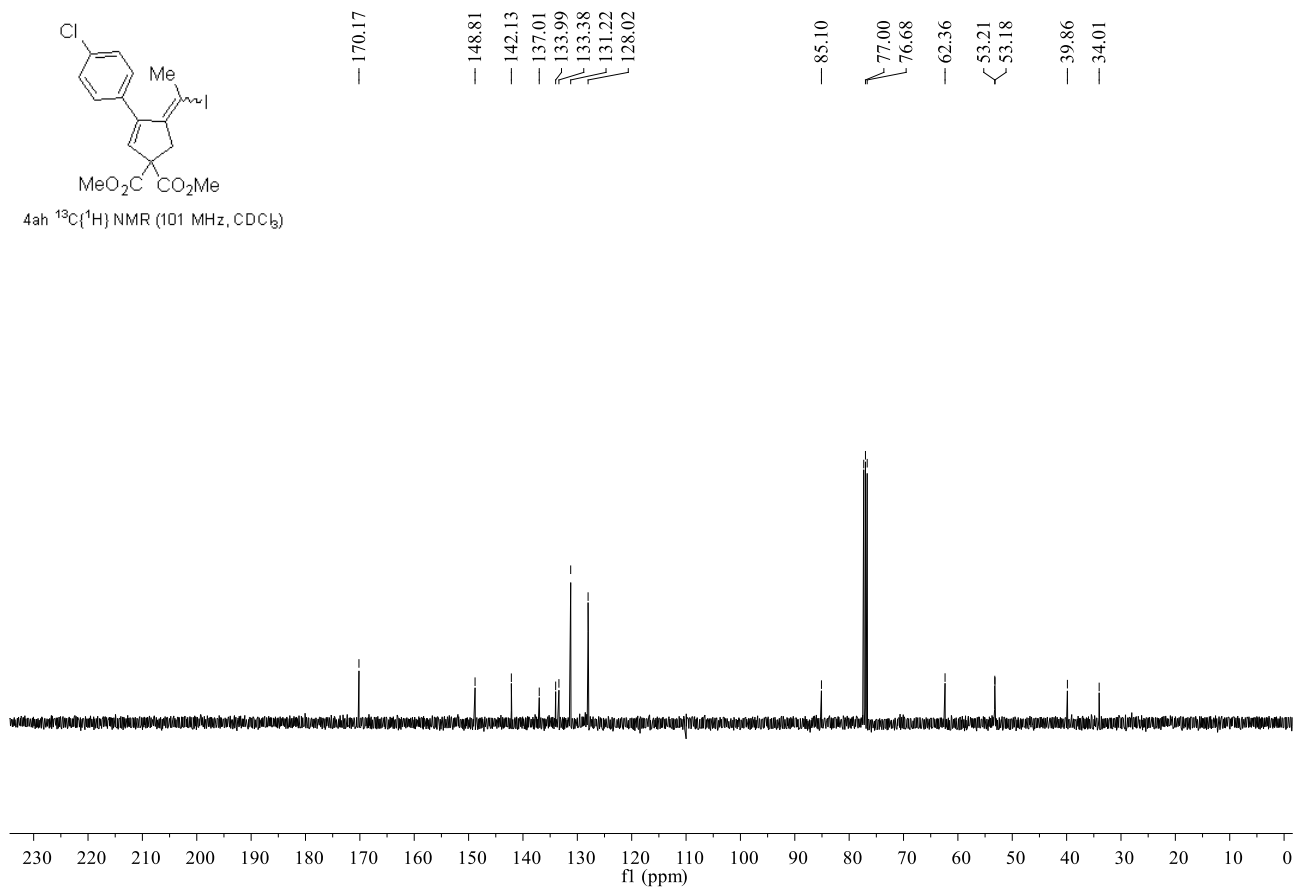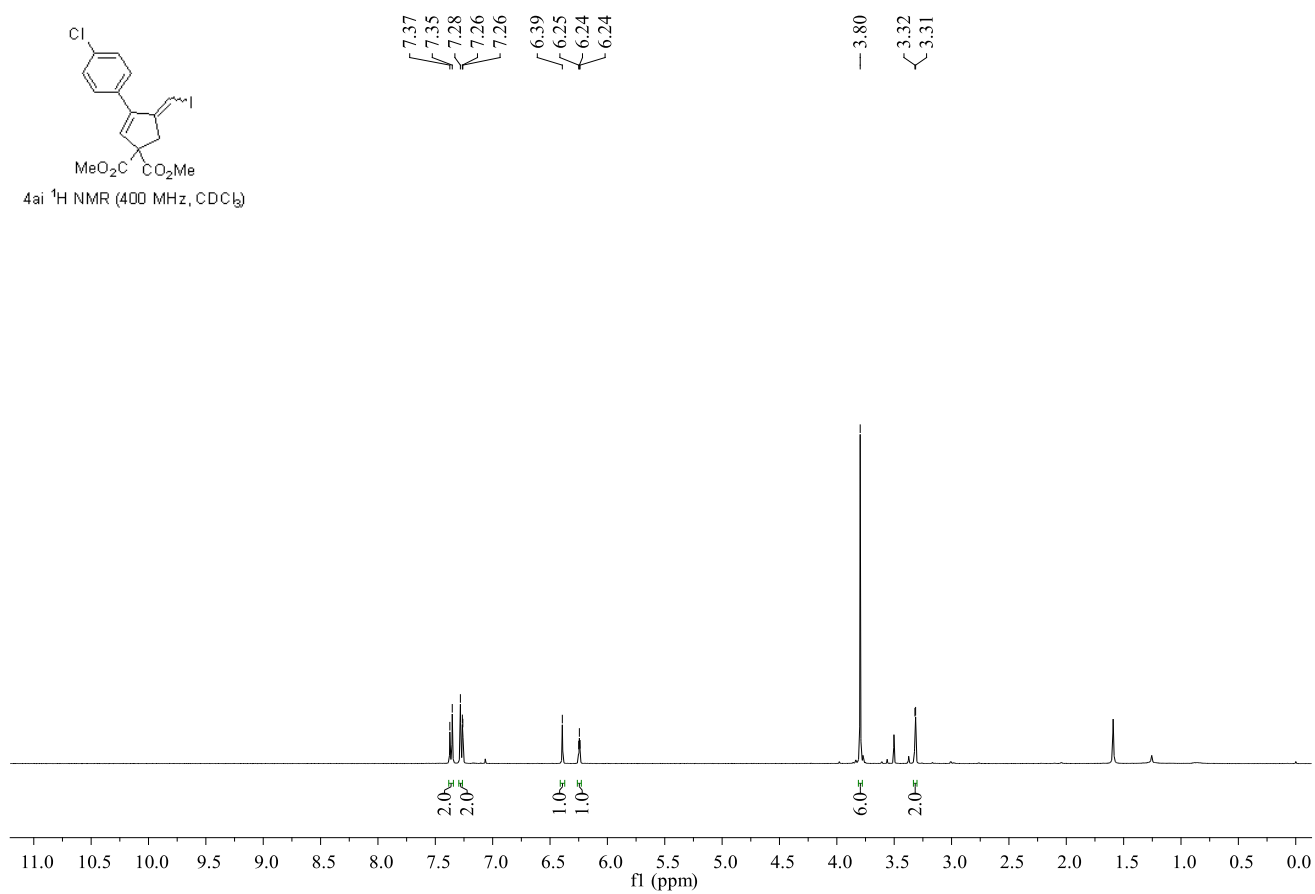

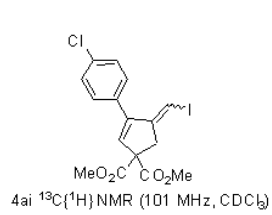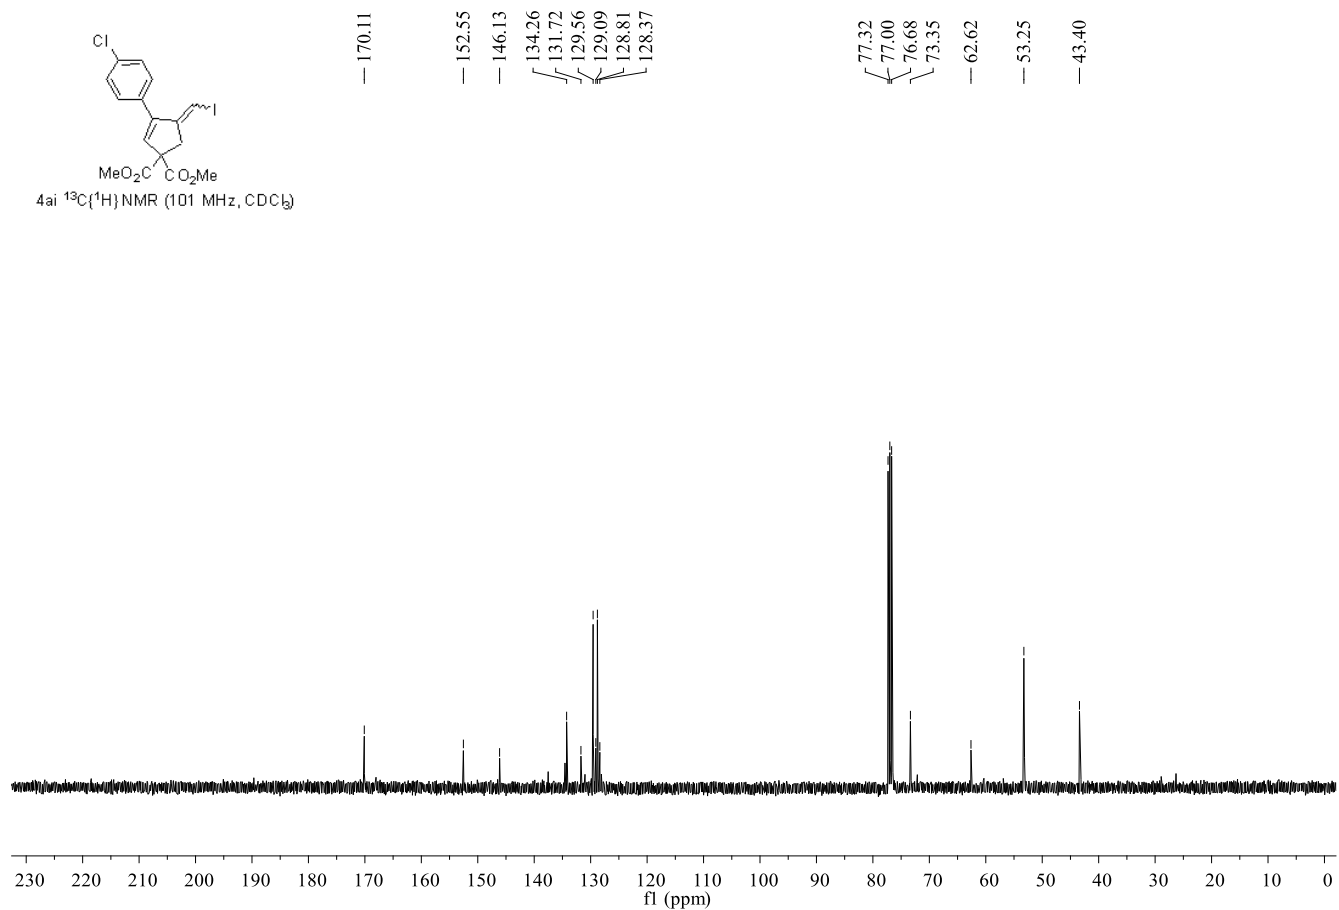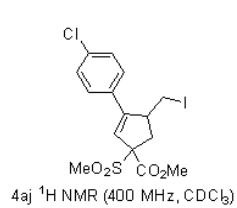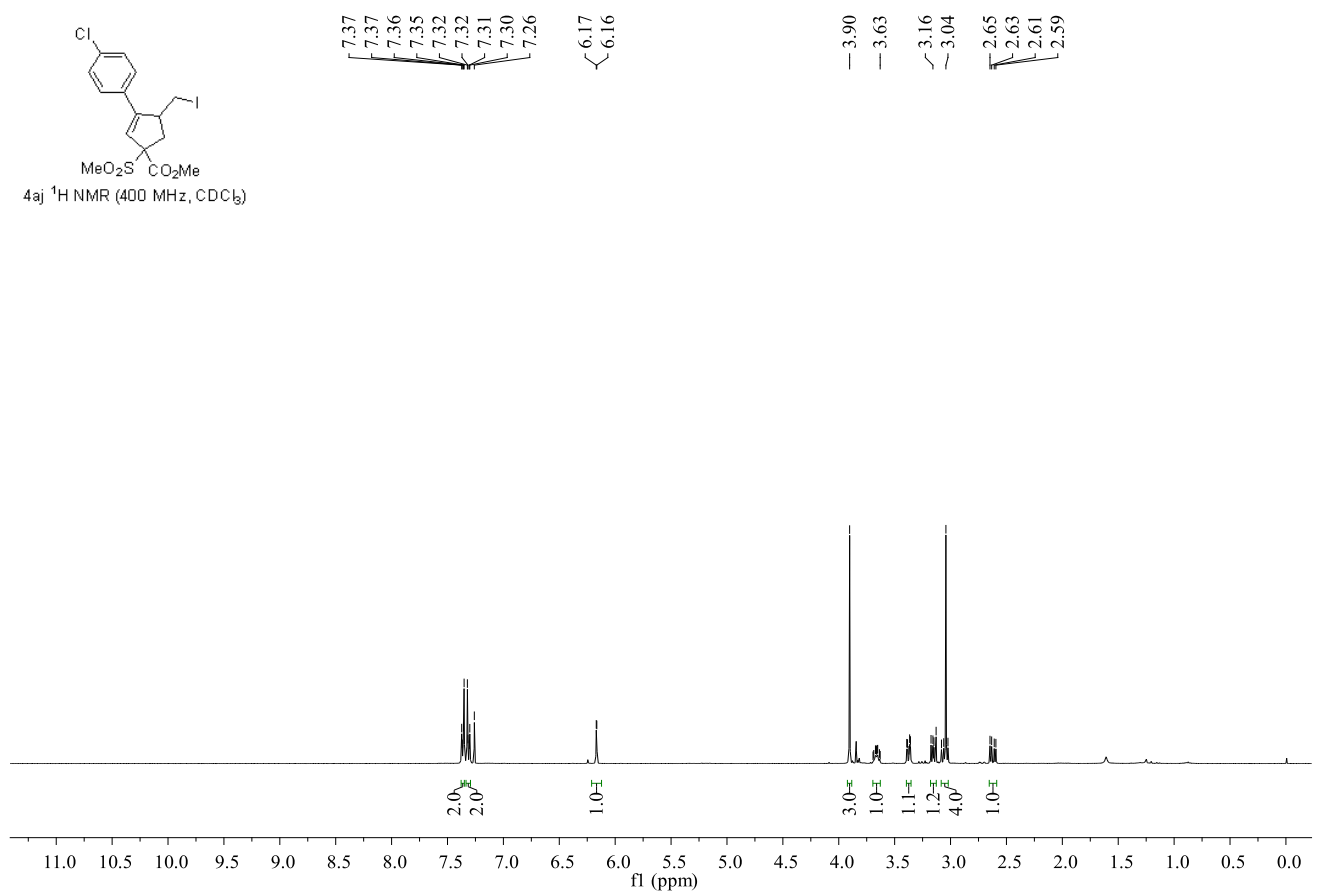

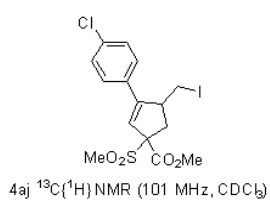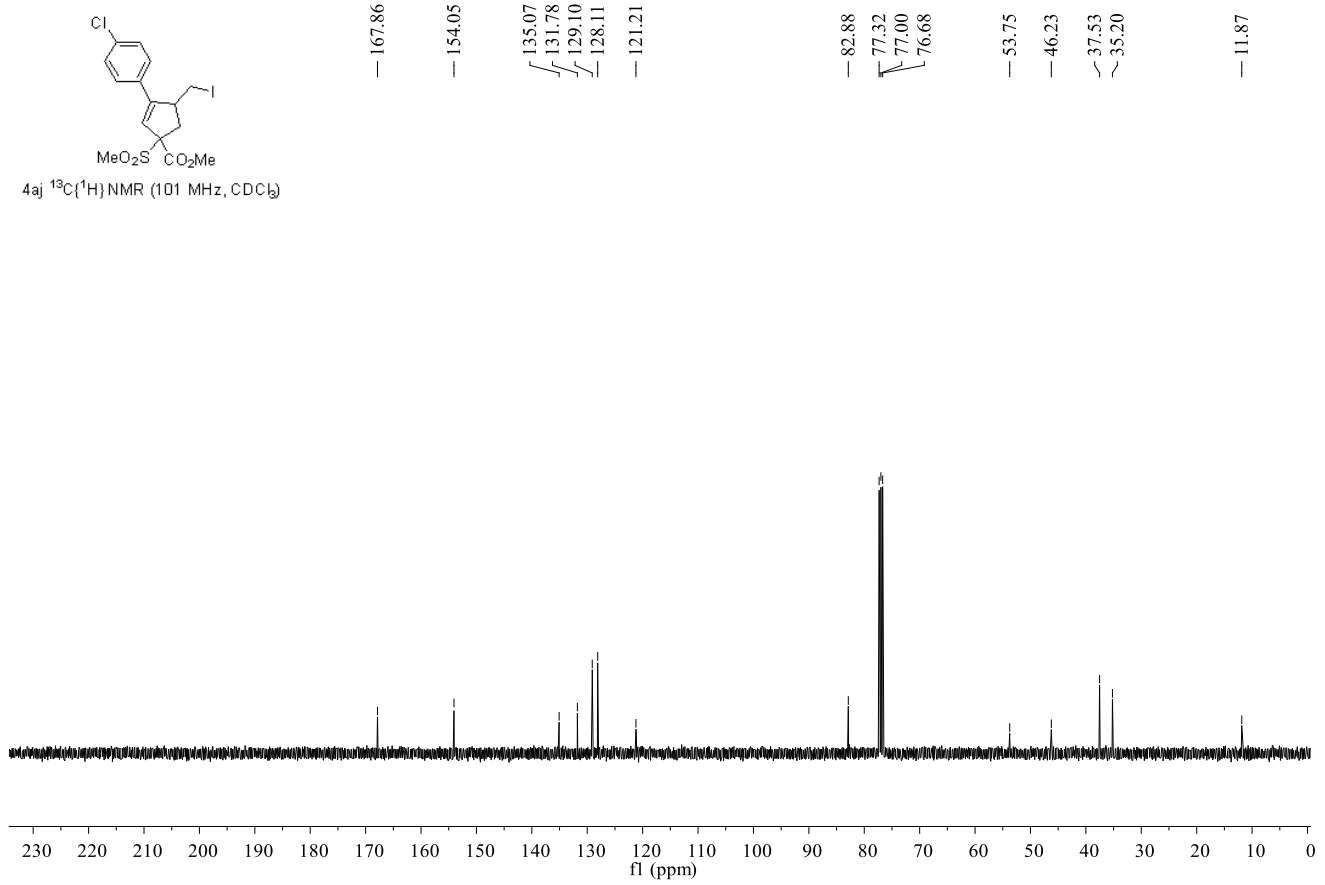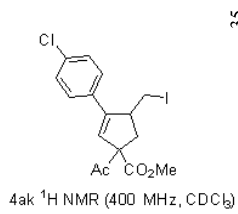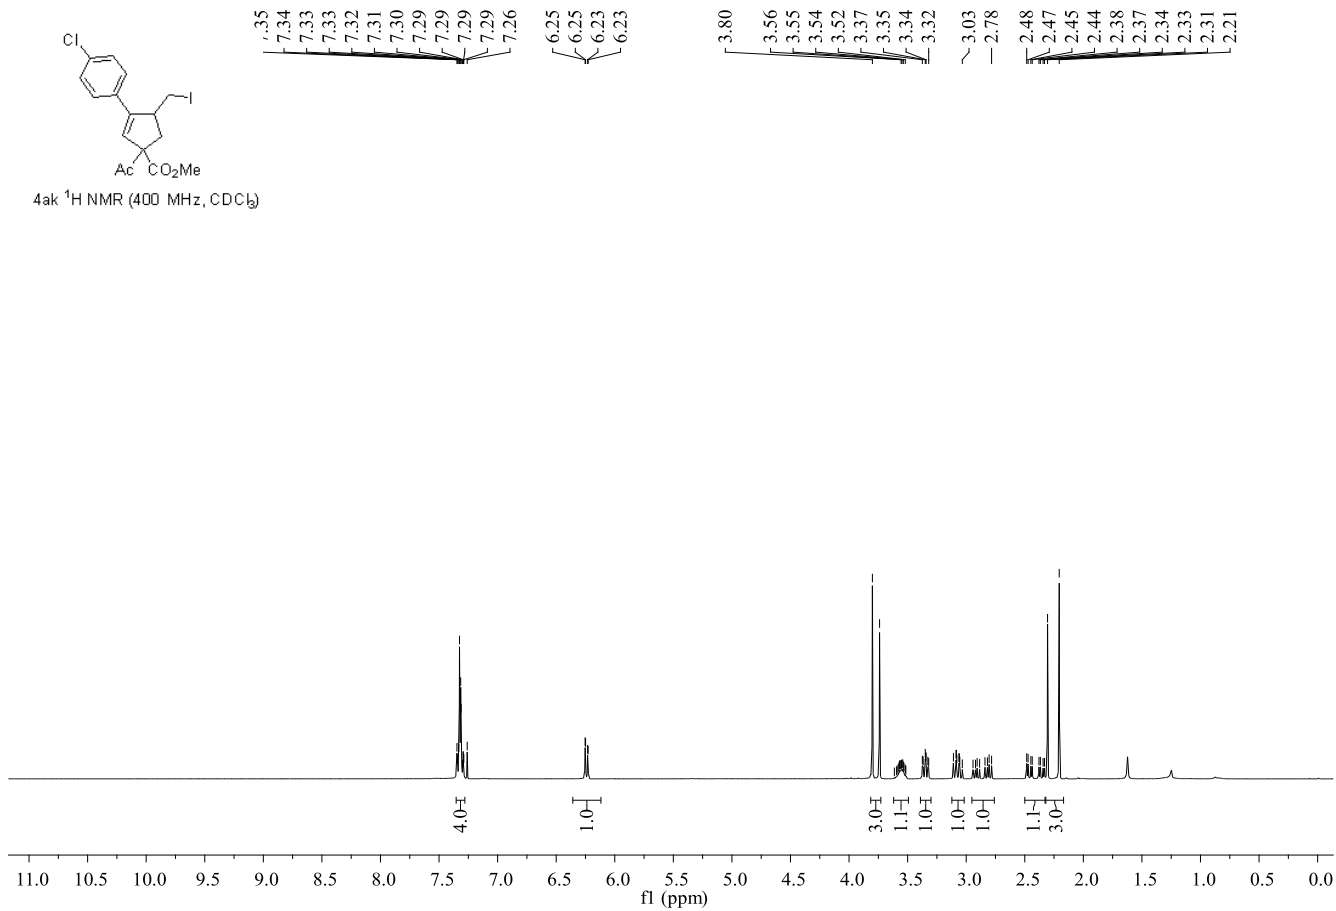

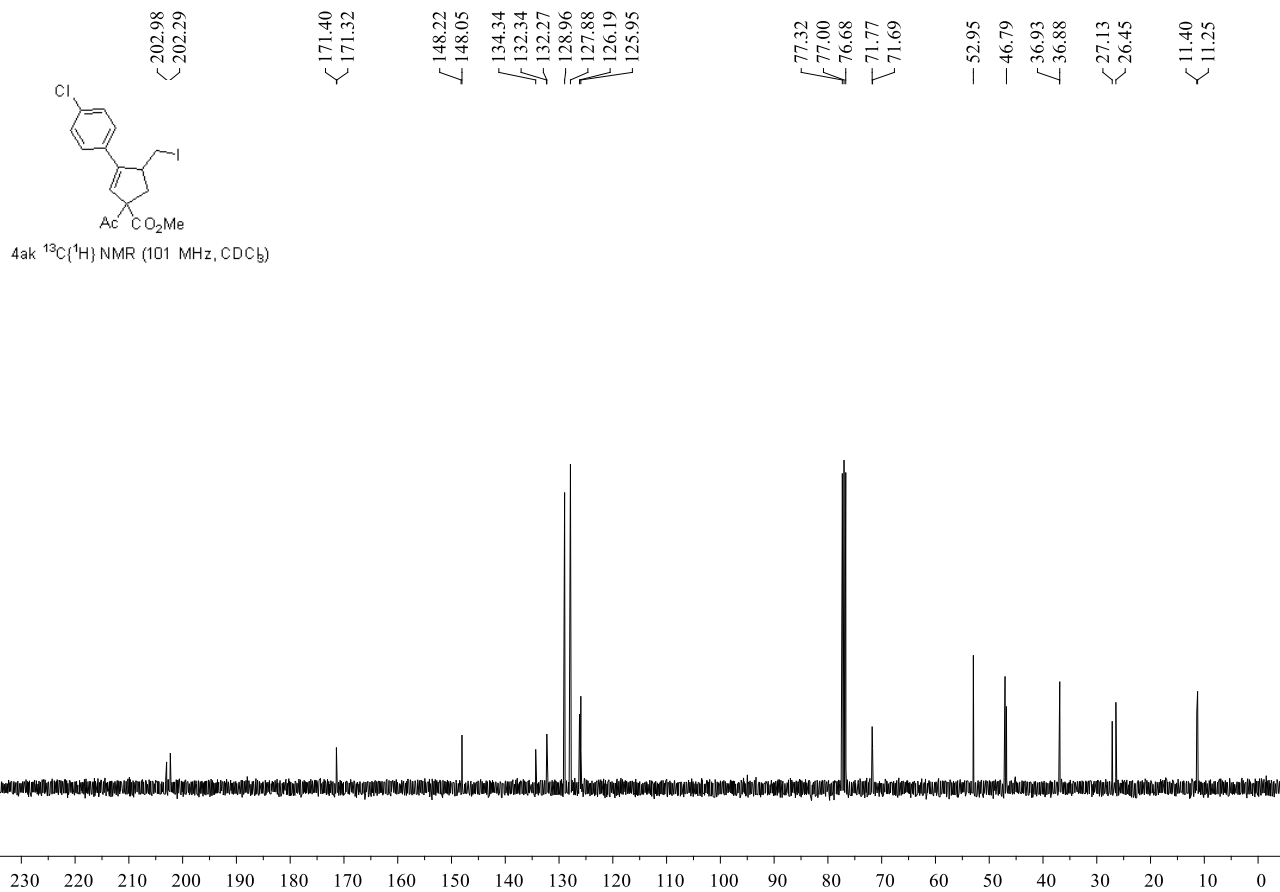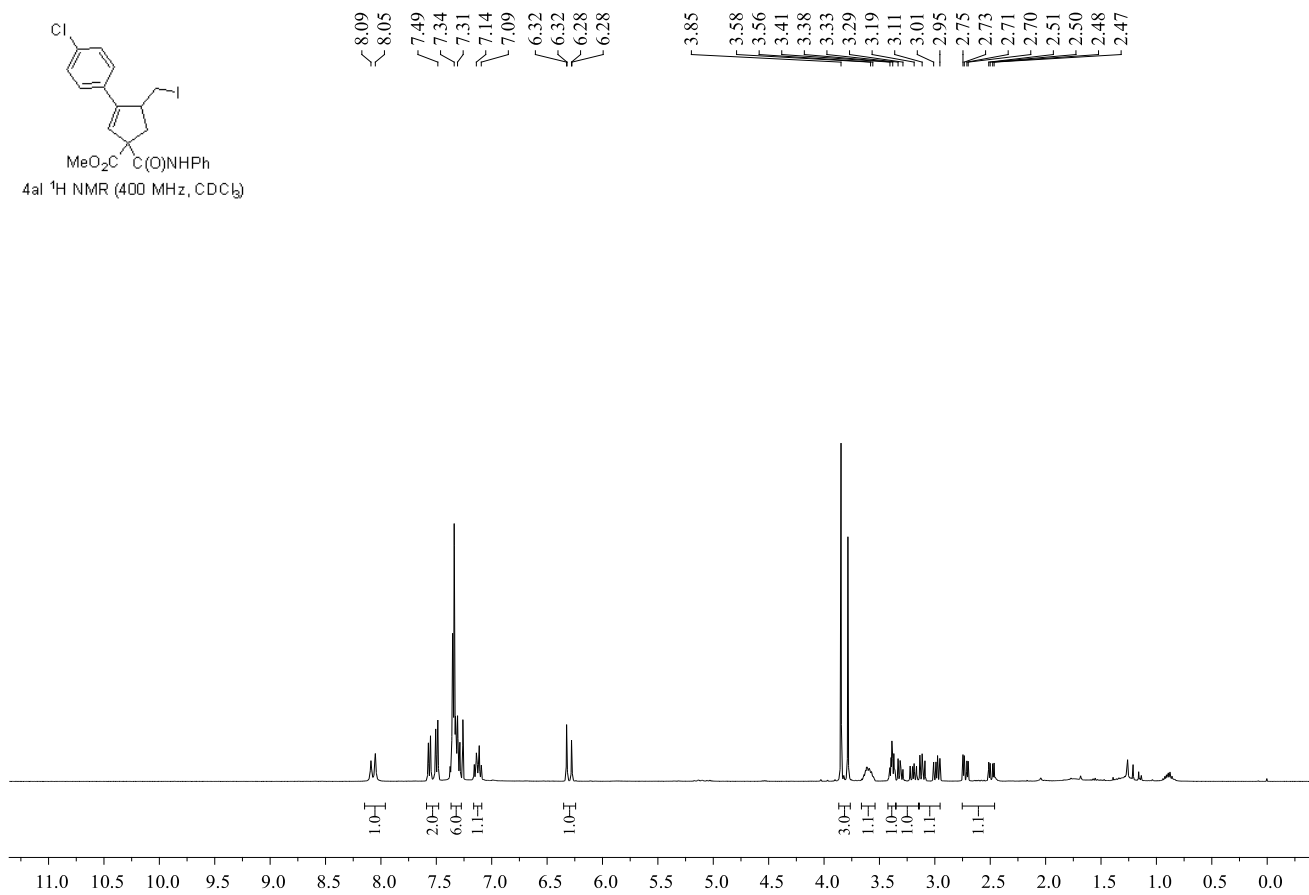

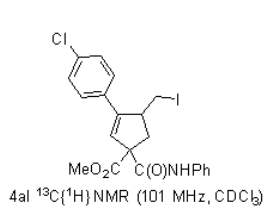

172.49  
 172.02  
 167.89  
 167.25  
 149.50  
 148.45  
 129.01  
 128.96  
 127.92  
 126.16  
 124.68  
 119.98  
 119.87

77.32  
 77.00  
 76.68  
 66.75  
 66.49  
 53.32  
 53.21  
 46.58  
 38.33  
 38.22

11.43

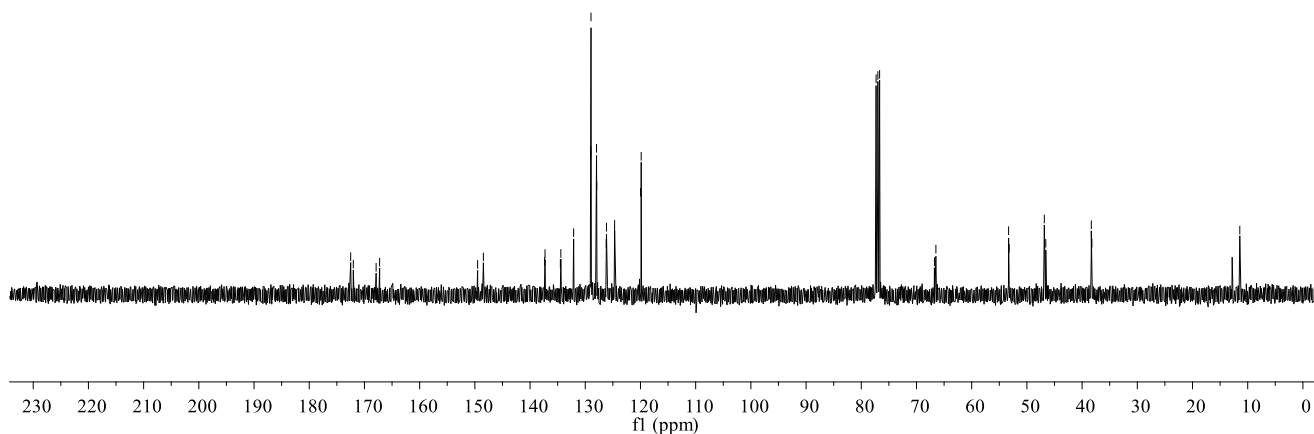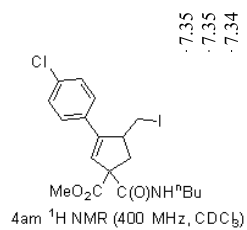

7.35  
 7.35  
 7.34  
 7.34  
 7.33  
 7.32  
 7.32  
 7.31  
 7.30  
 7.29  
 7.29  
 7.26  
 6.22  
 6.14  
 6.13  
 6.12  
 6.06  
 6.05  
 6.04

3.80  
 3.51  
 3.49  
 3.35  
 3.33  
 3.29  
 3.26  
 3.23  
 3.10  
 3.04  
 2.80  
 2.63  
 2.56  
 2.34  
 2.32  
 2.32  
 1.45  
 1.35  
 1.29  
 0.95  
 0.93  
 0.91  
 0.91  
 0.90  
 0.88

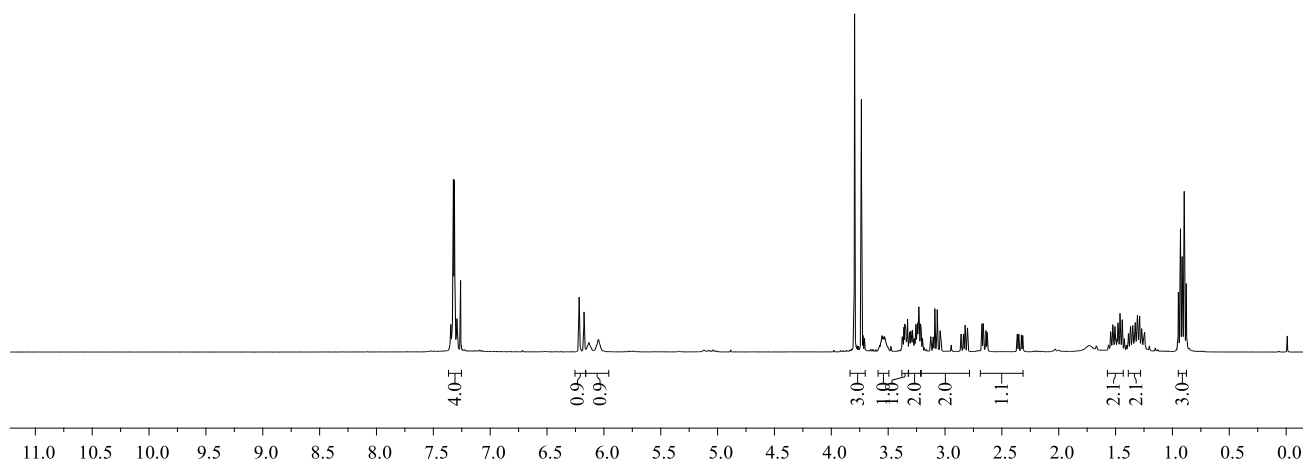



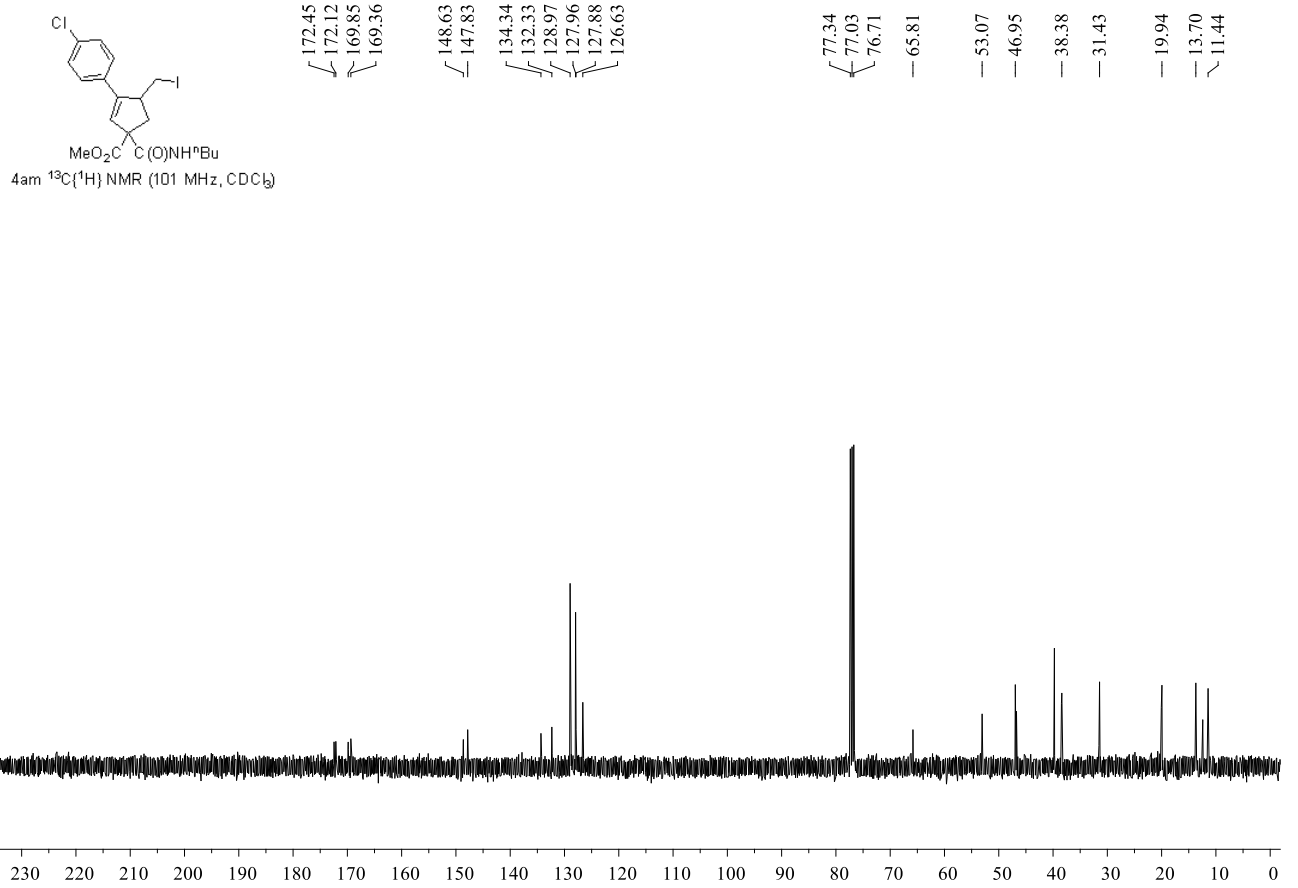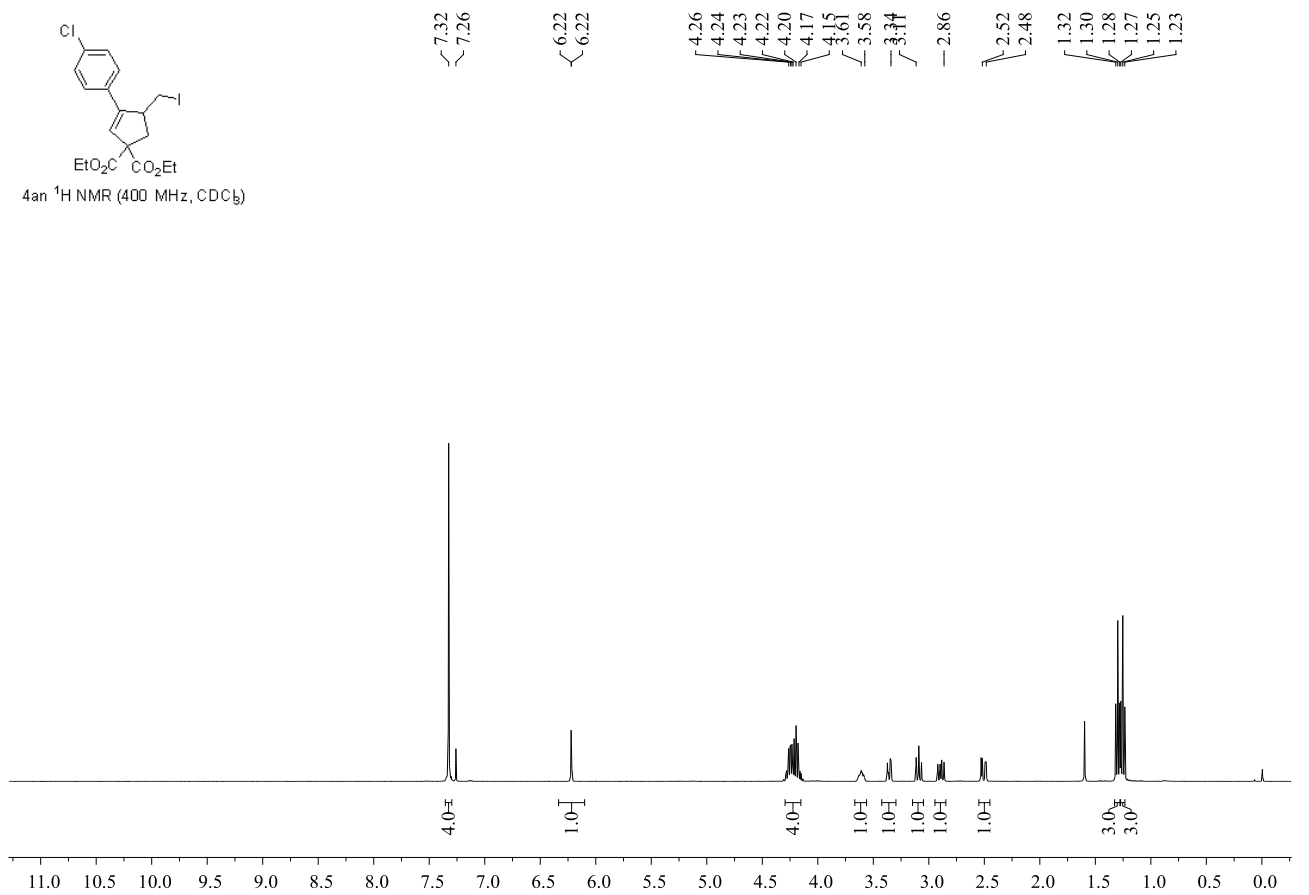

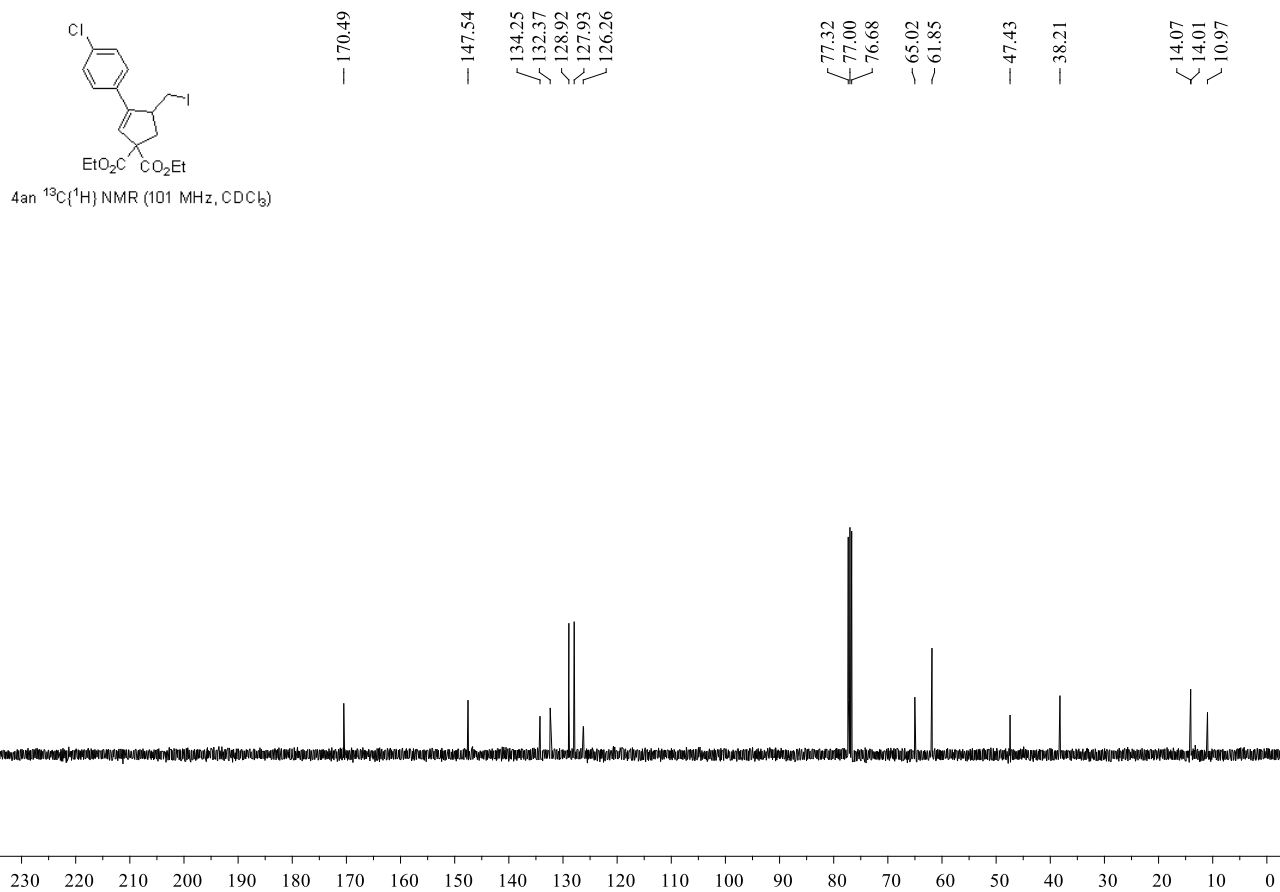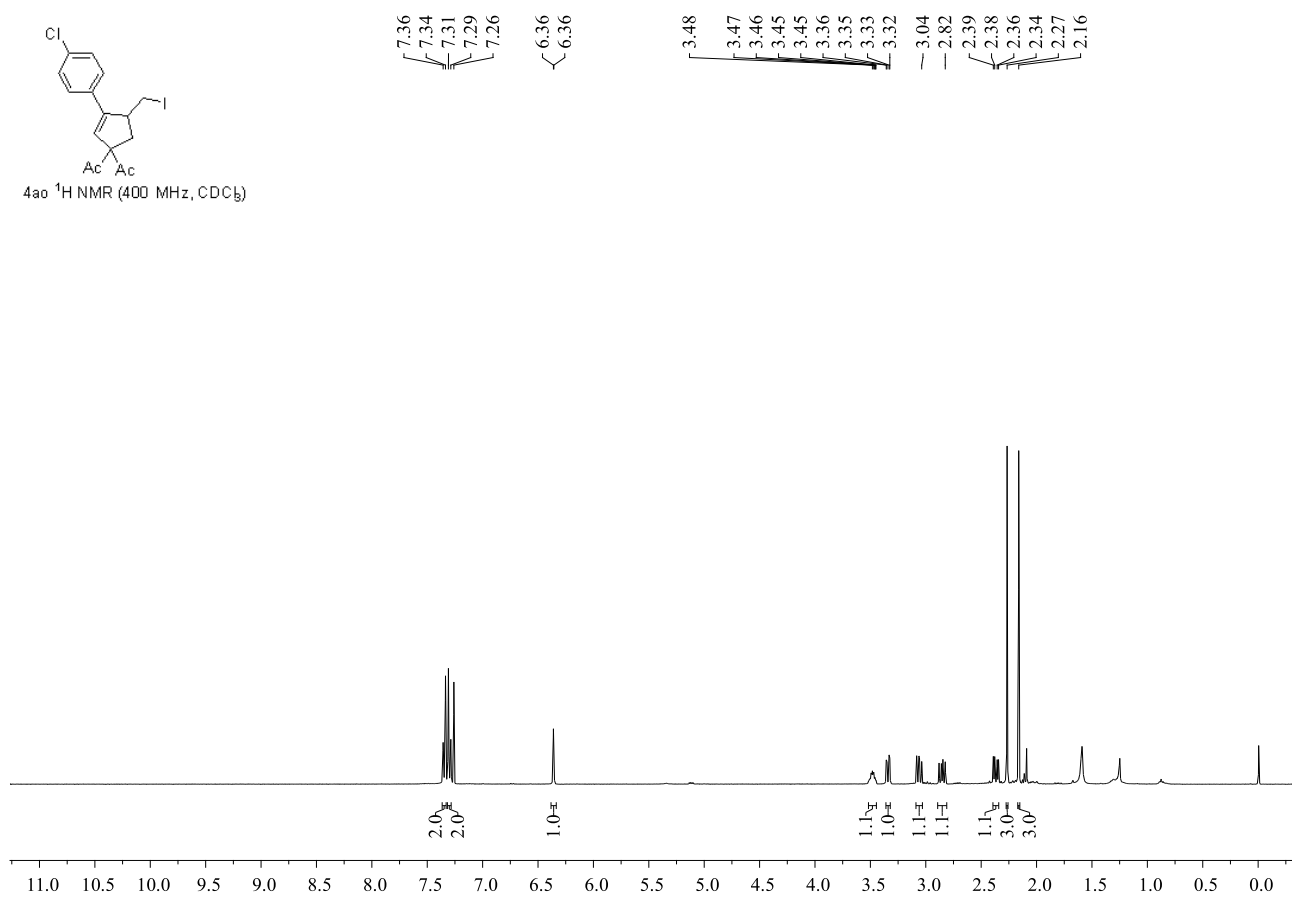

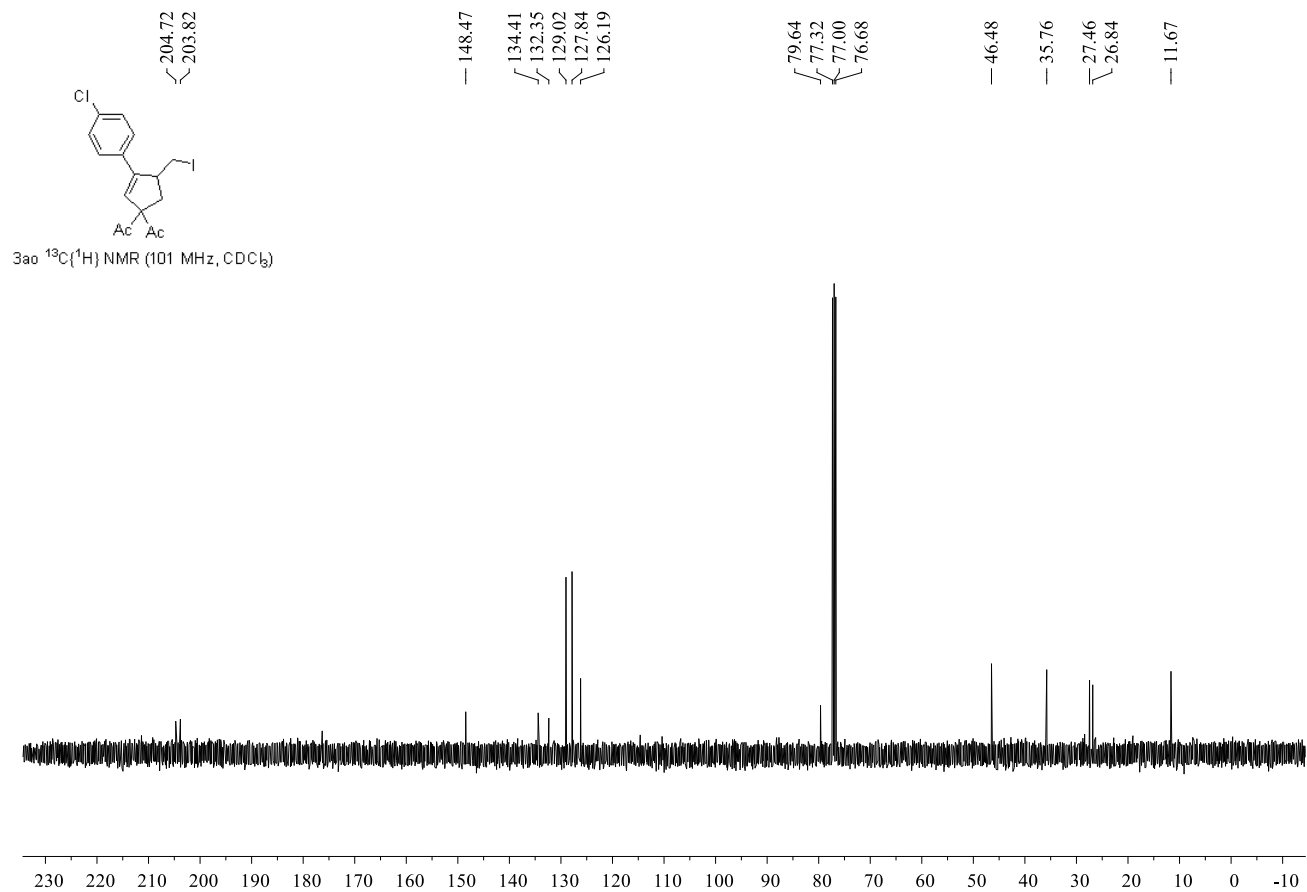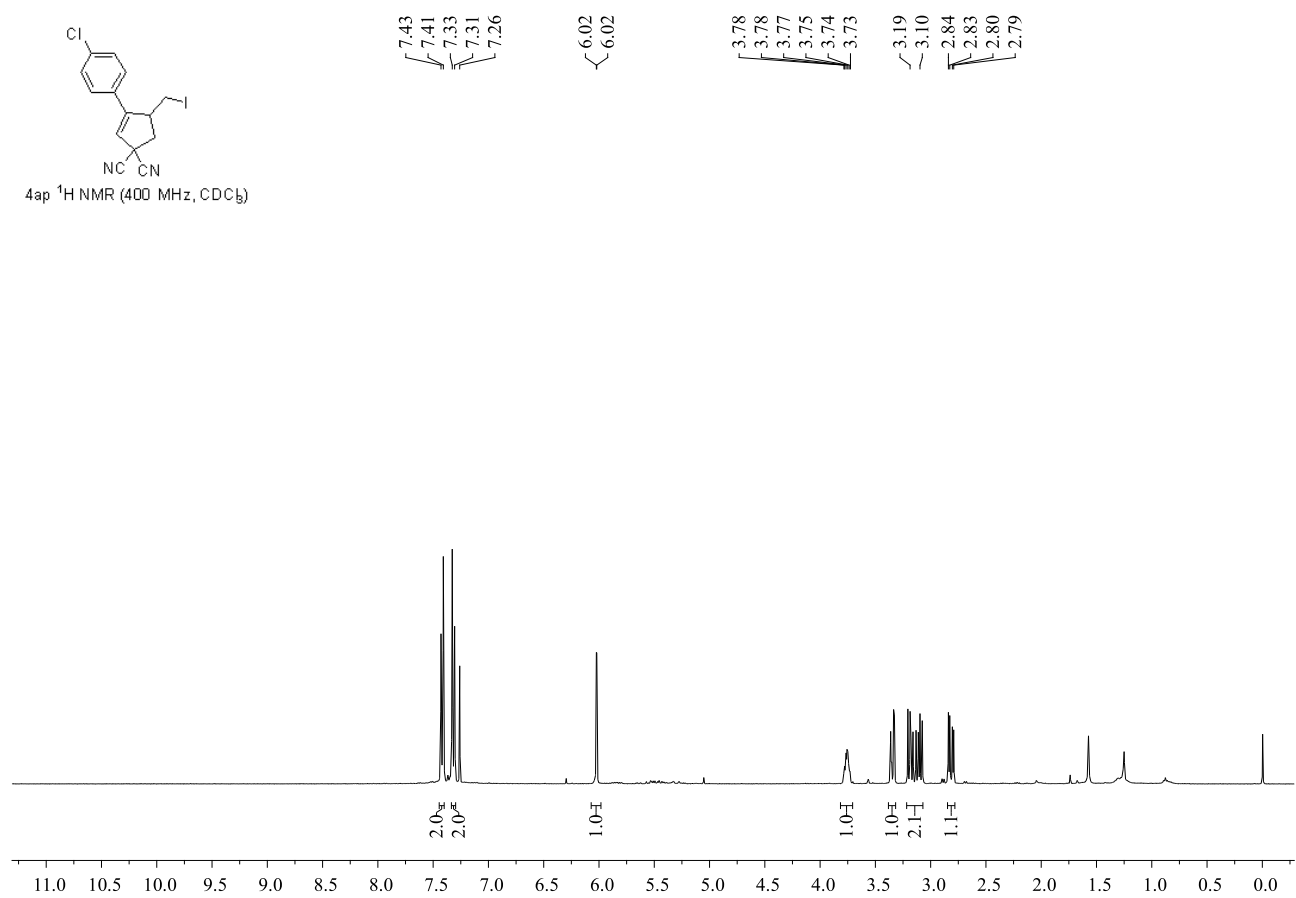

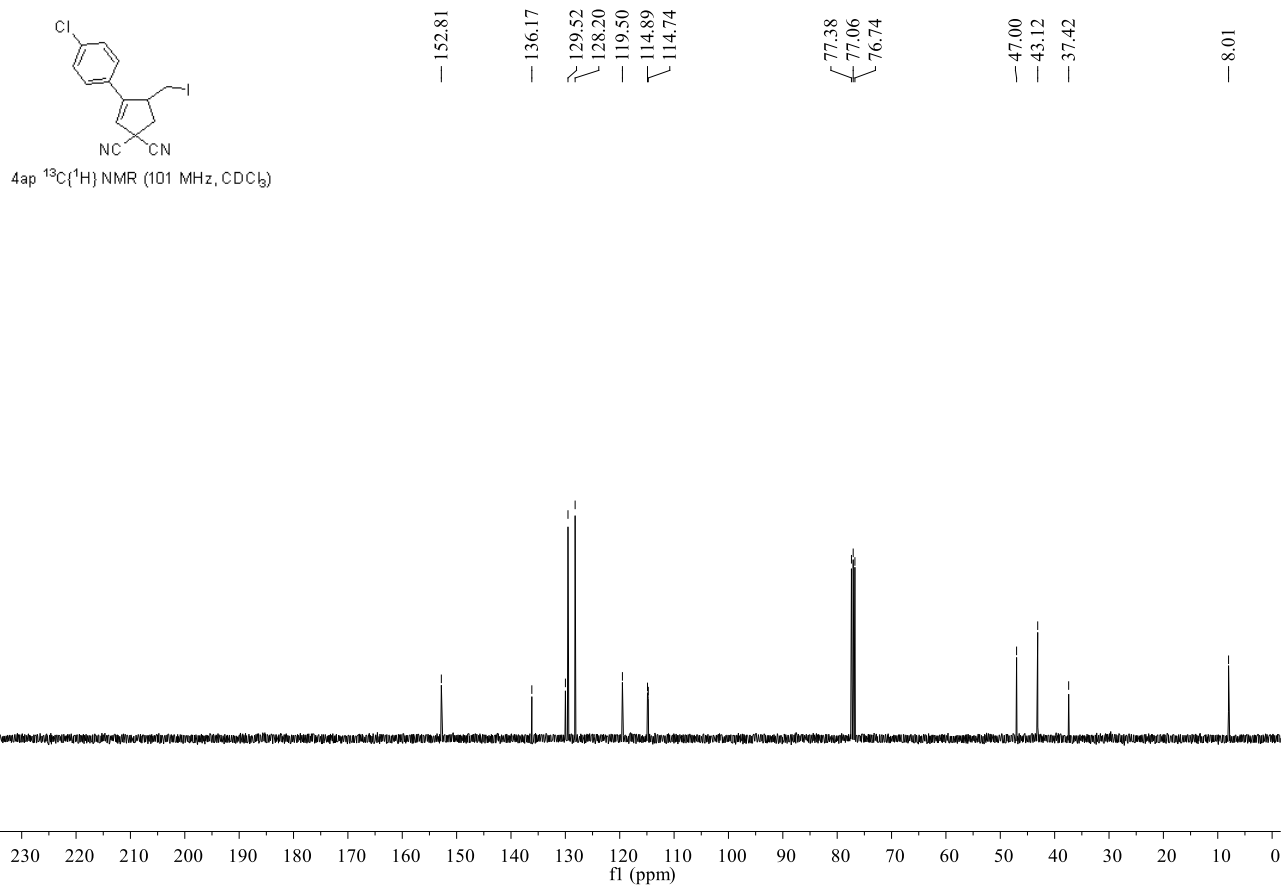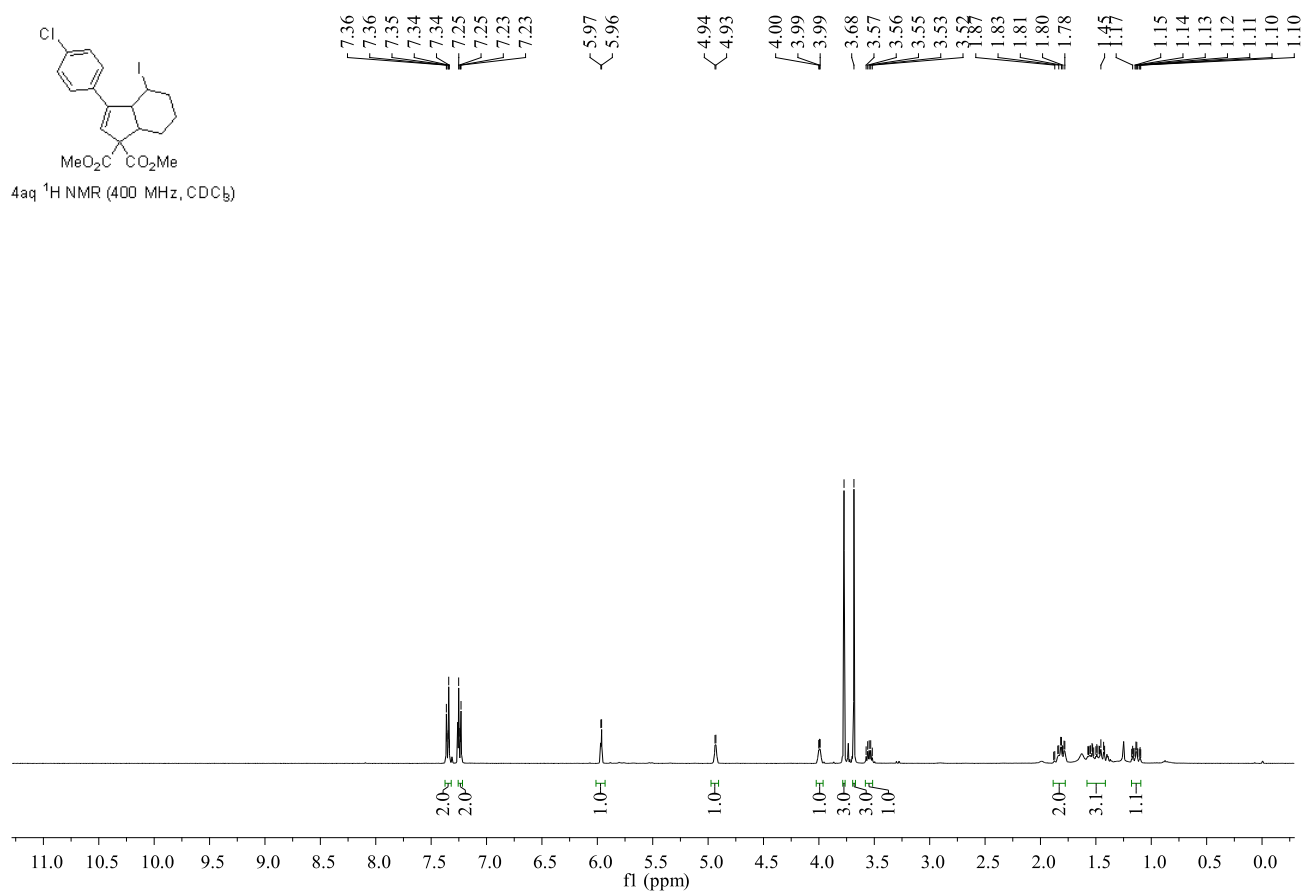

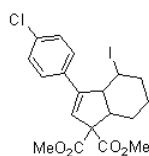

4aq  $^{13}\text{C}\{^1\text{H}\}$  NMR (101 MHz,  $\text{CDCl}_3$ )

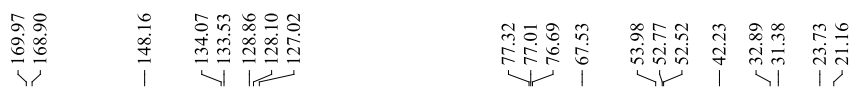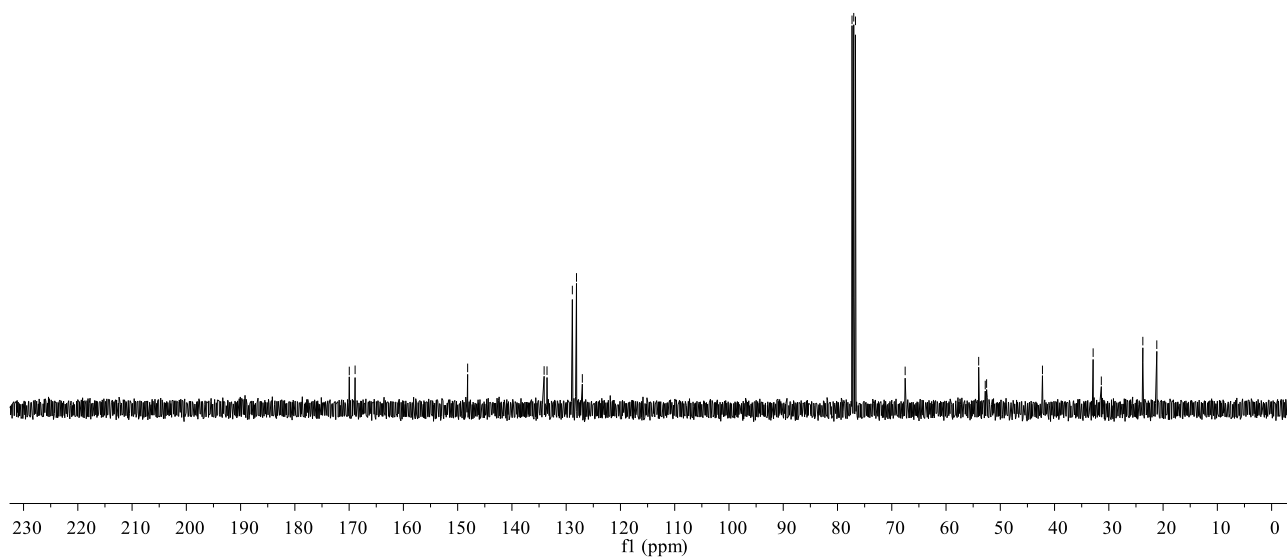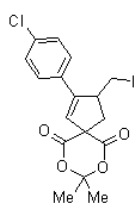

4ar  $^1\text{H}$  NMR (400 MHz,  $\text{CDCl}_3$ )

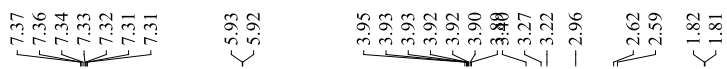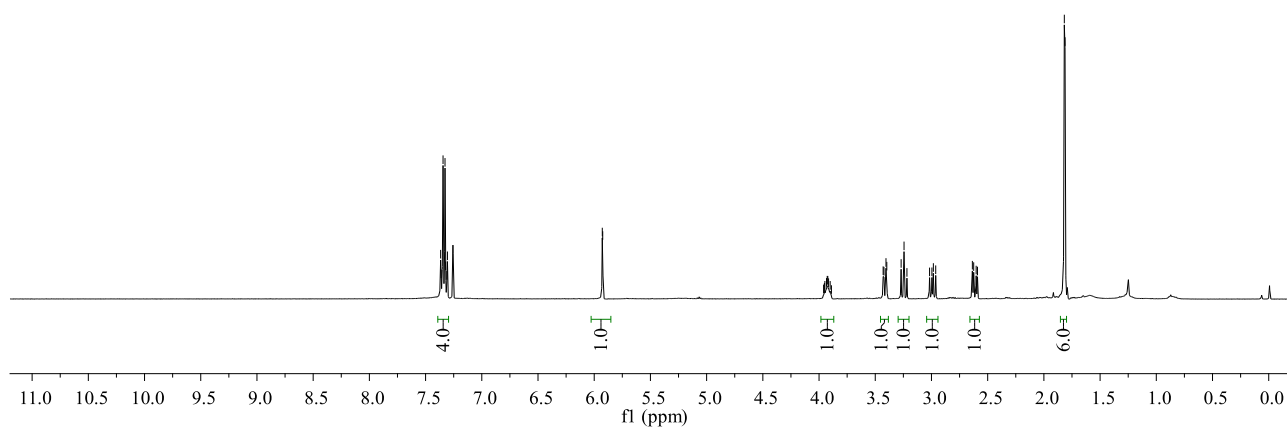

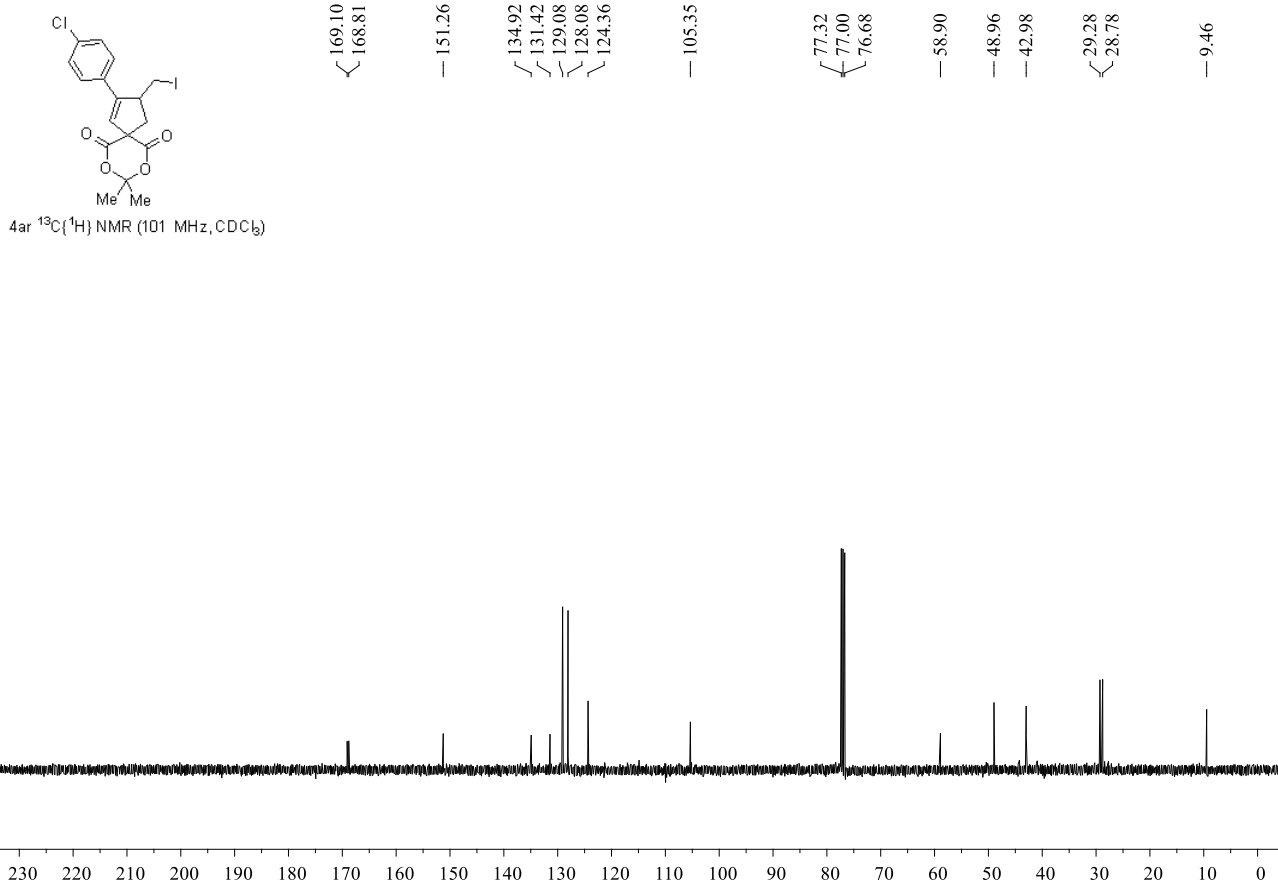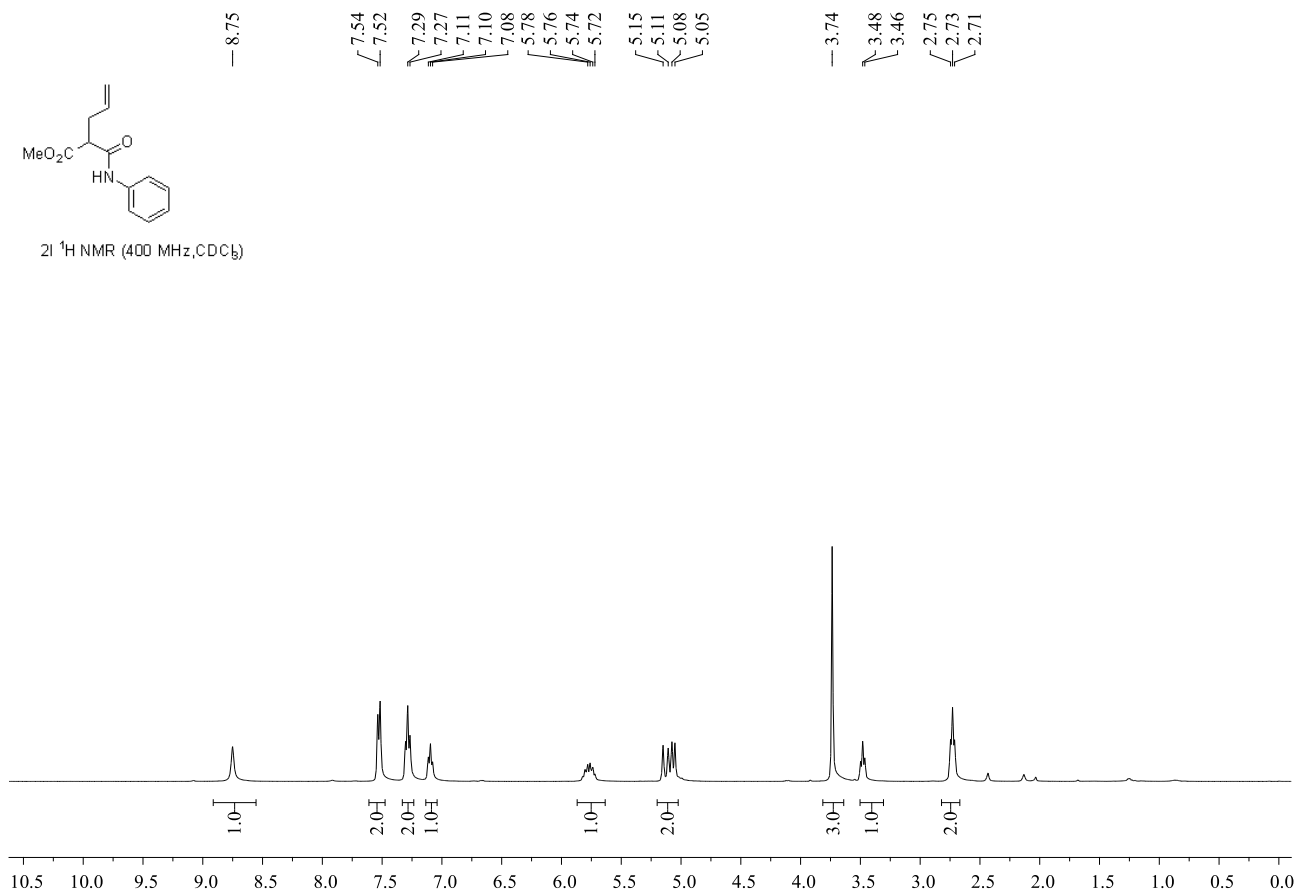

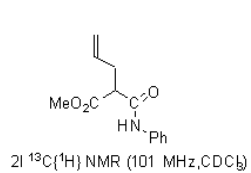

— 171.51  
 — 166.04  
 — 137.37  
 — 133.57  
 — 128.79  
 — 124.48  
 — 120.06  
 — 117.90

{ 77.32  
 { 77.00  
 { 76.68

{ 52.95  
 { 52.47

— 34.55

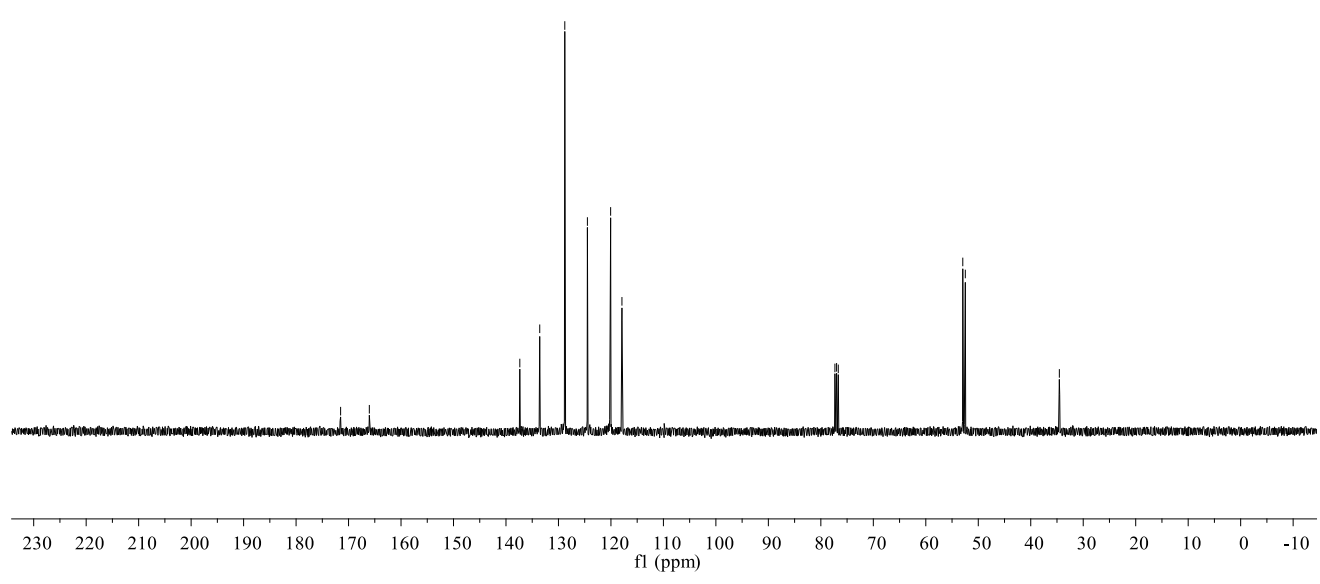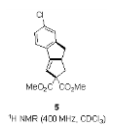

{ 7.24  
 { 7.13  
 { 7.10  
 — 6.21  
 { 5.09  
 { 5.08  
 { 5.03  
 { 5.02  
 { 3.77  
 { 3.75  
 { 3.74  
 { 3.73  
 { 3.35  
 { 3.35  
 { 3.35

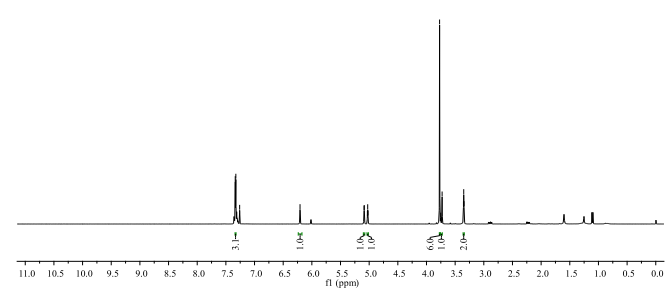

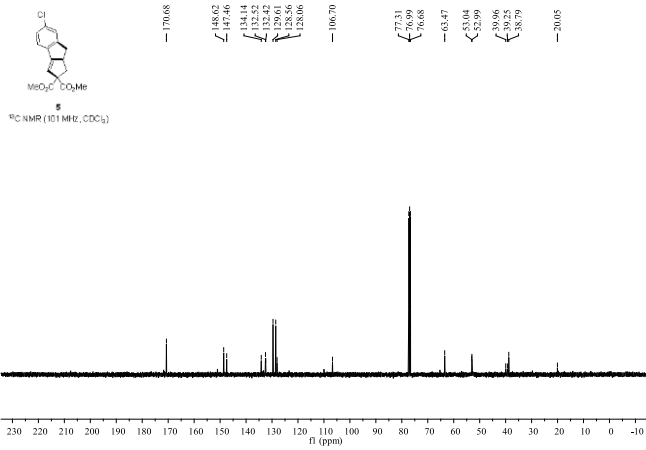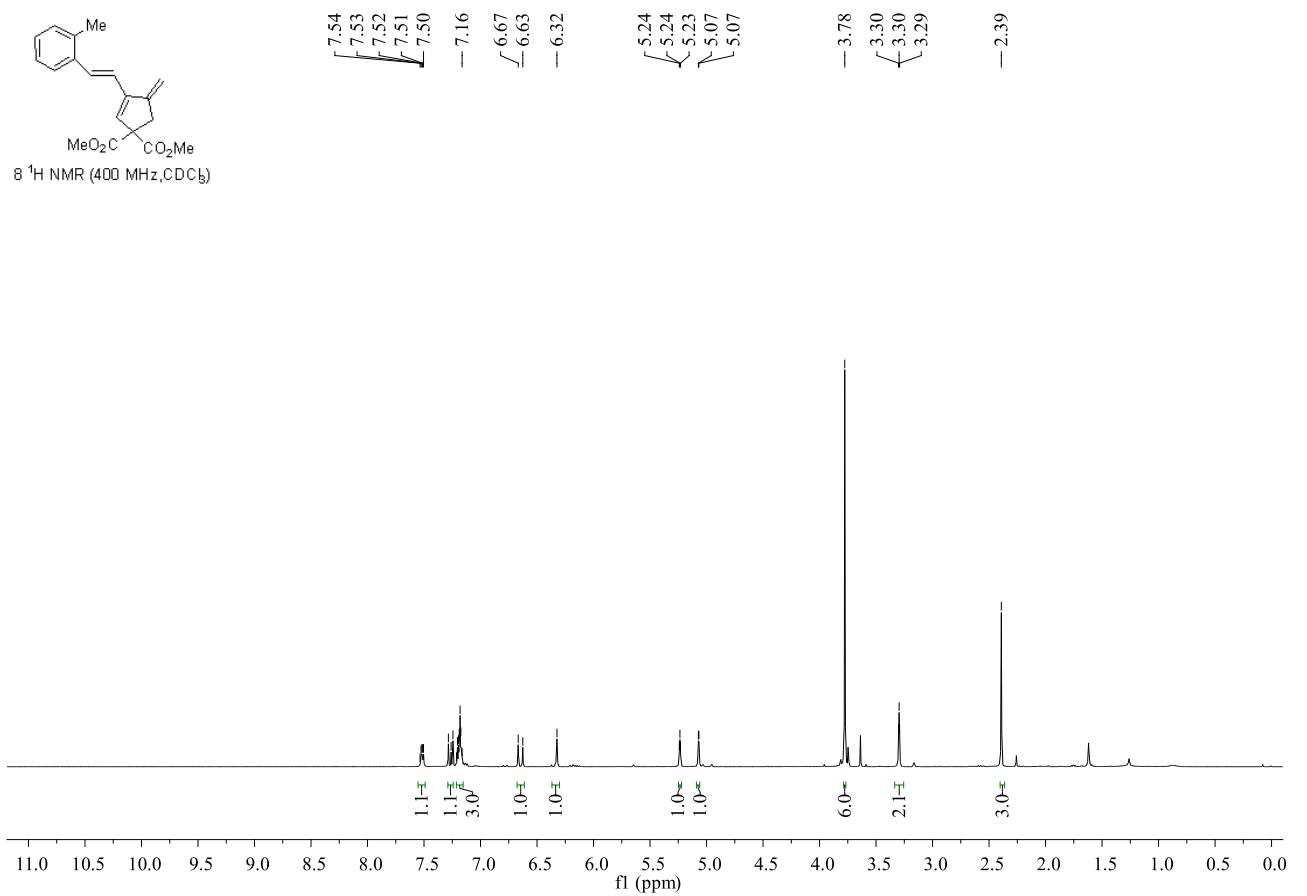



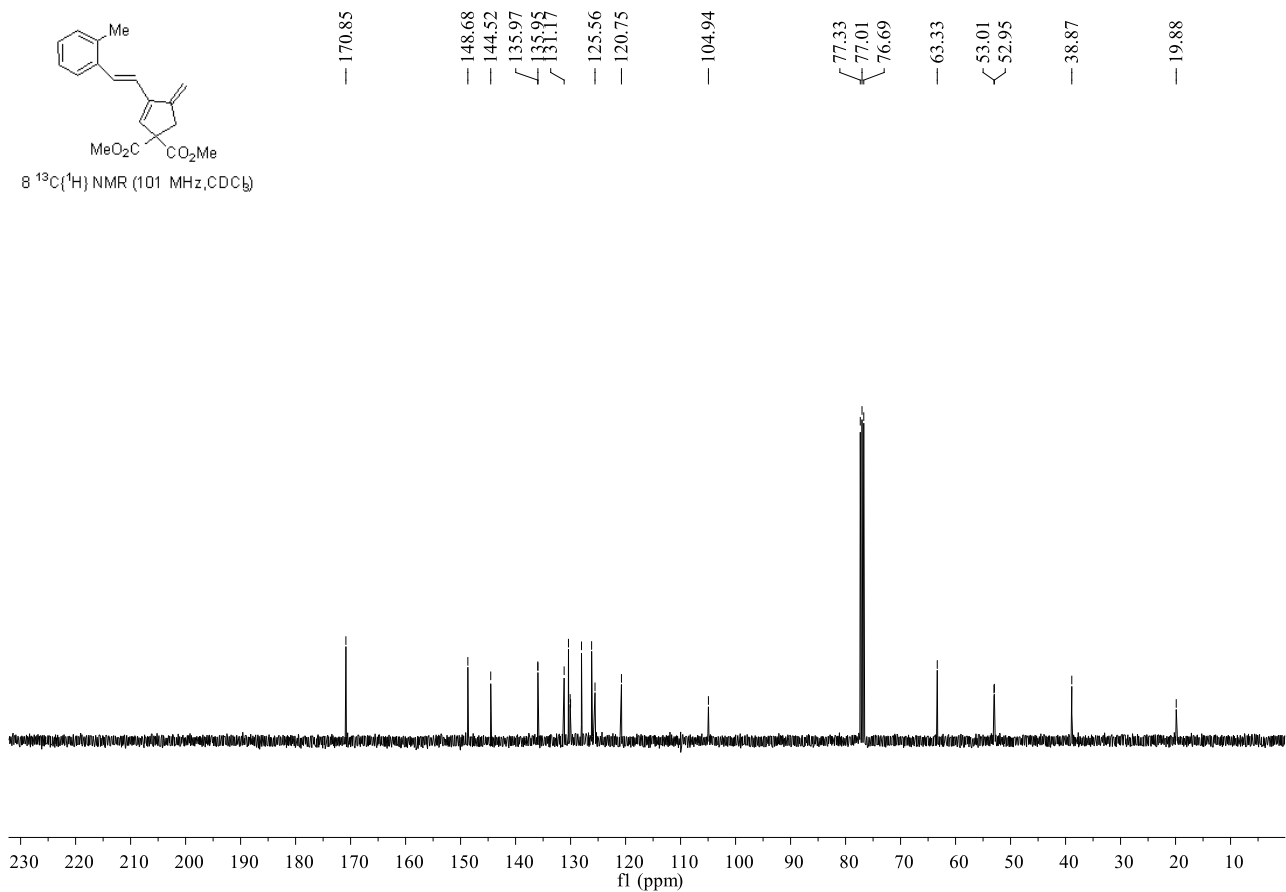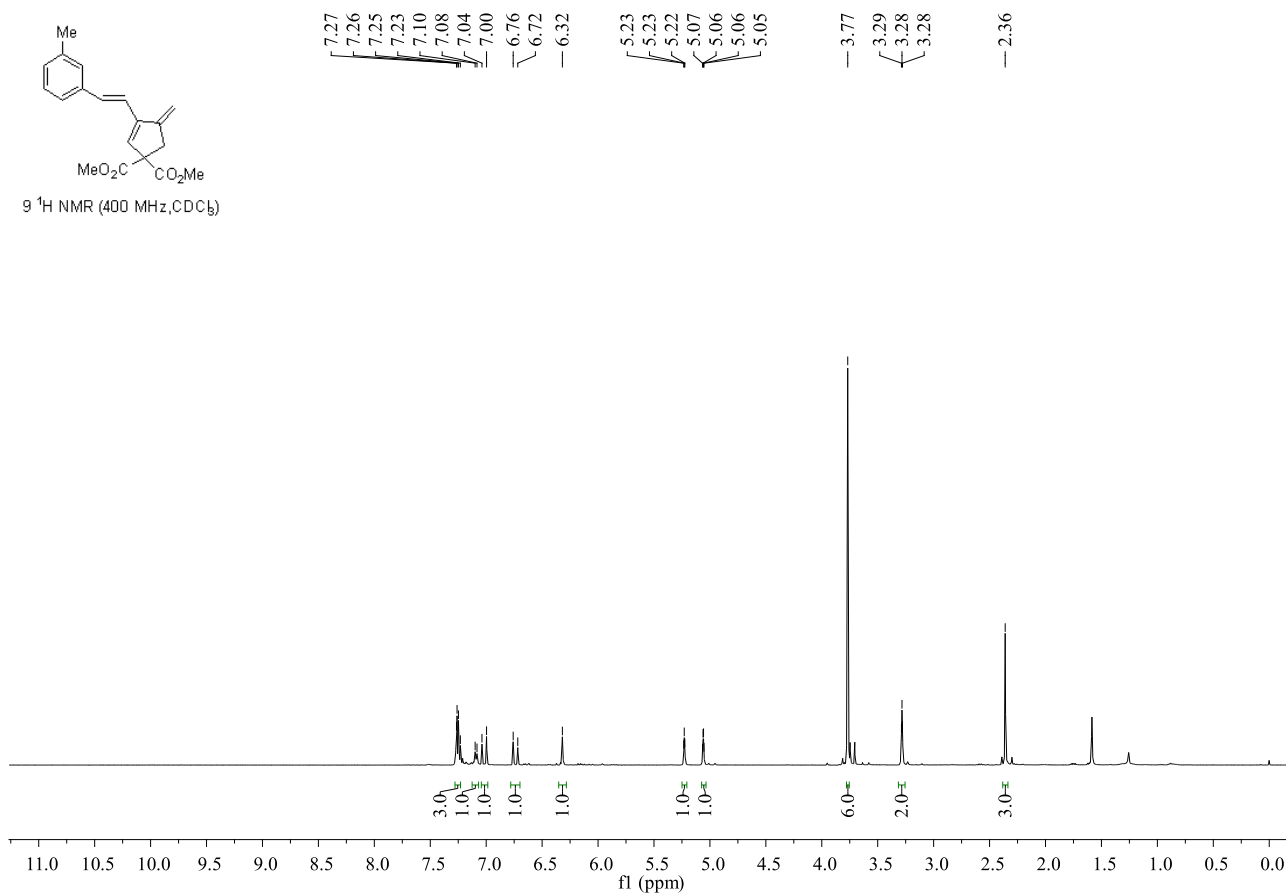

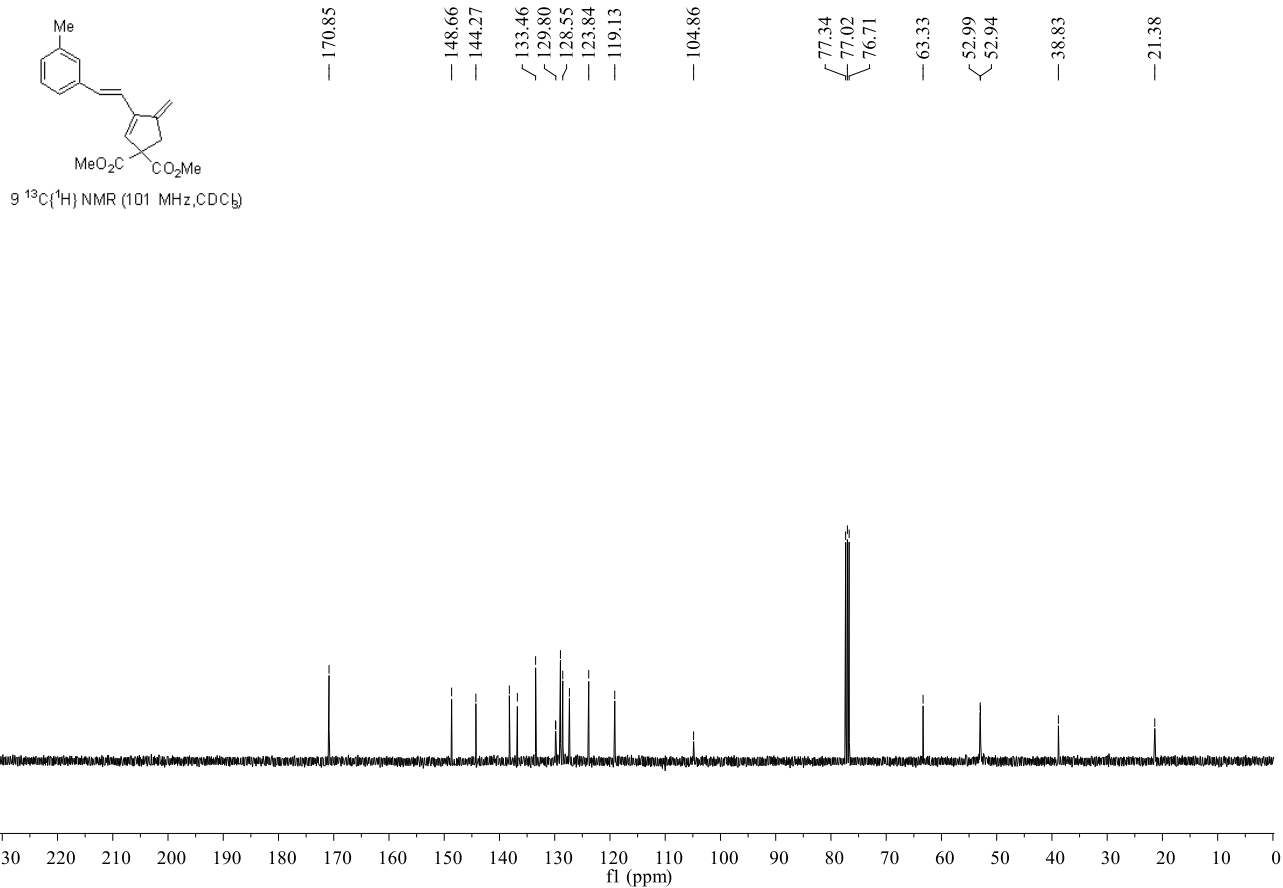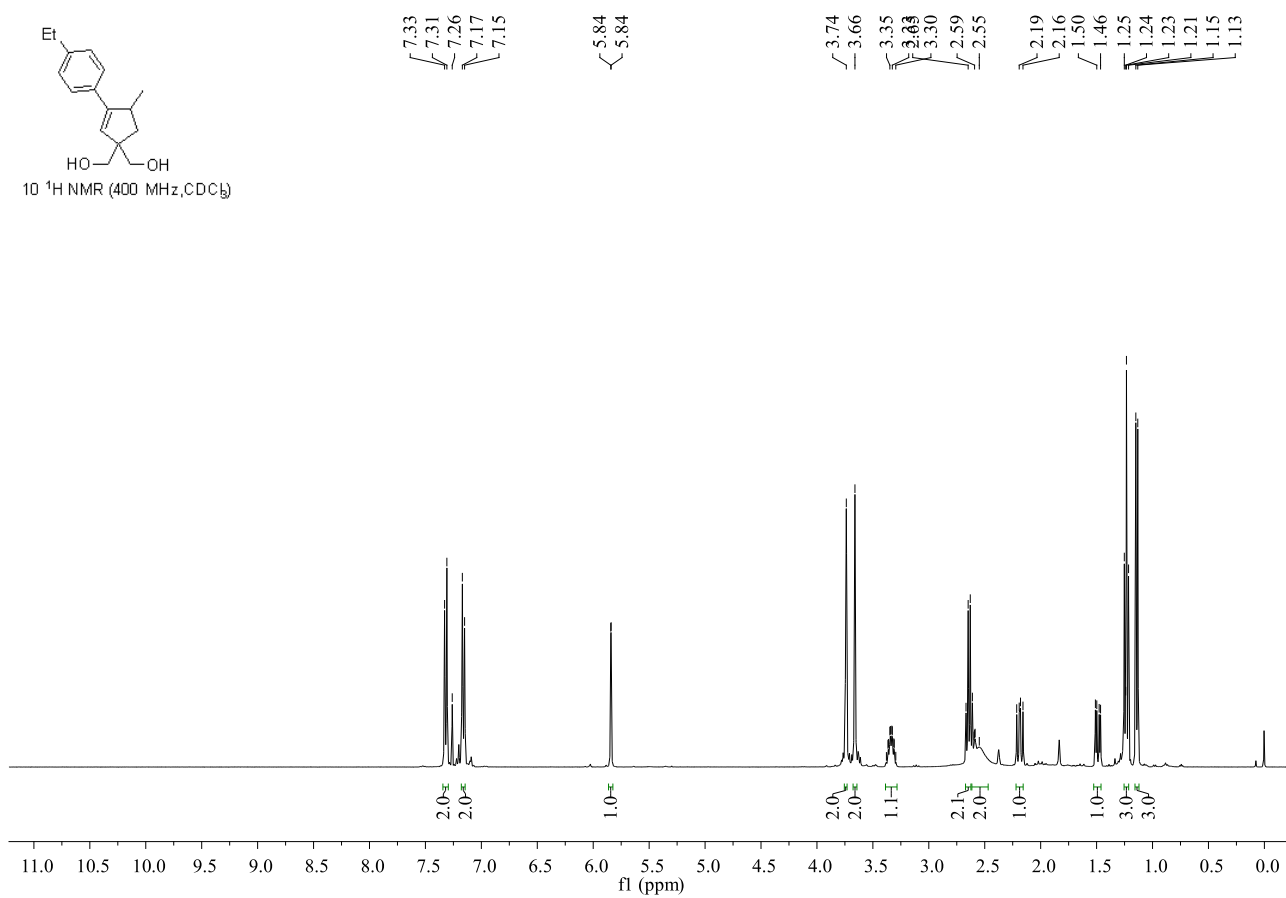

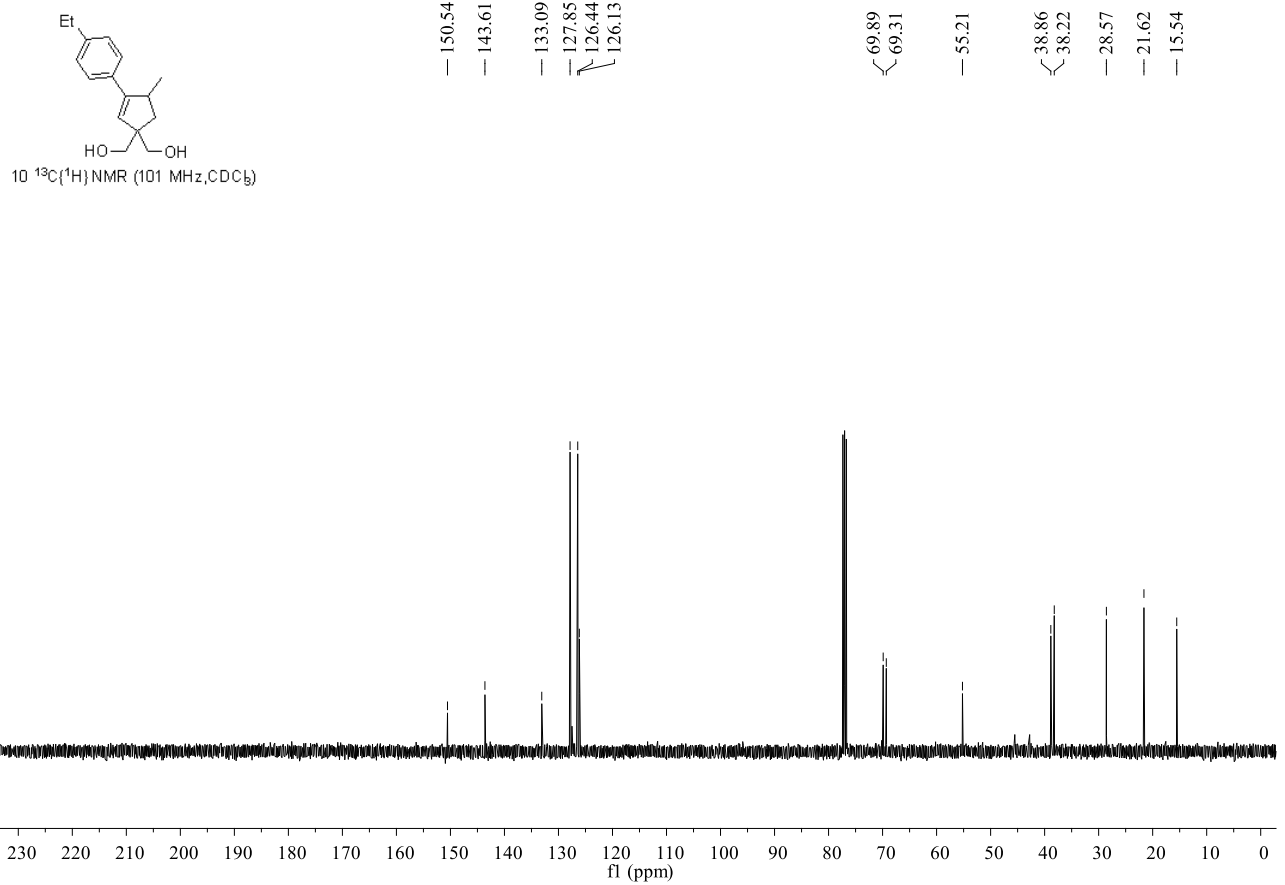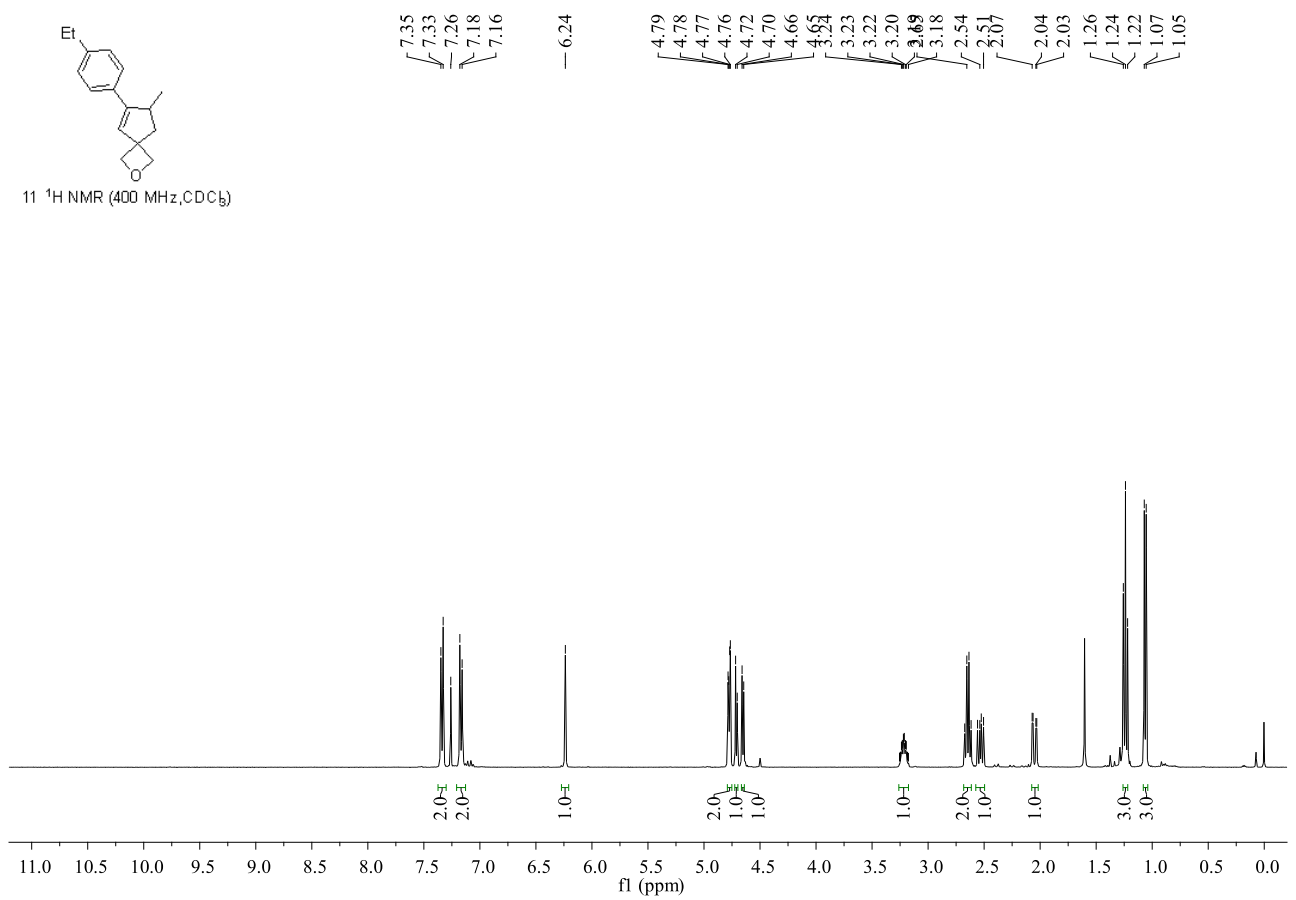

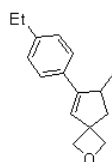

11  $^{13}\text{C}$  ( $^1\text{H}$ ) NMR (101 MHz,  $\text{CDCl}_3$ )

— 149.07  
— 143.71  
— 132.55  
— 128.18  
— 127.93  
— 126.31  
— 83.90  
— 83.31  
— 77.33  
— 77.01  
— 76.70  
— 51.64  
— 45.37  
— 39.20  
— 28.57  
— 21.24  
— 15.52

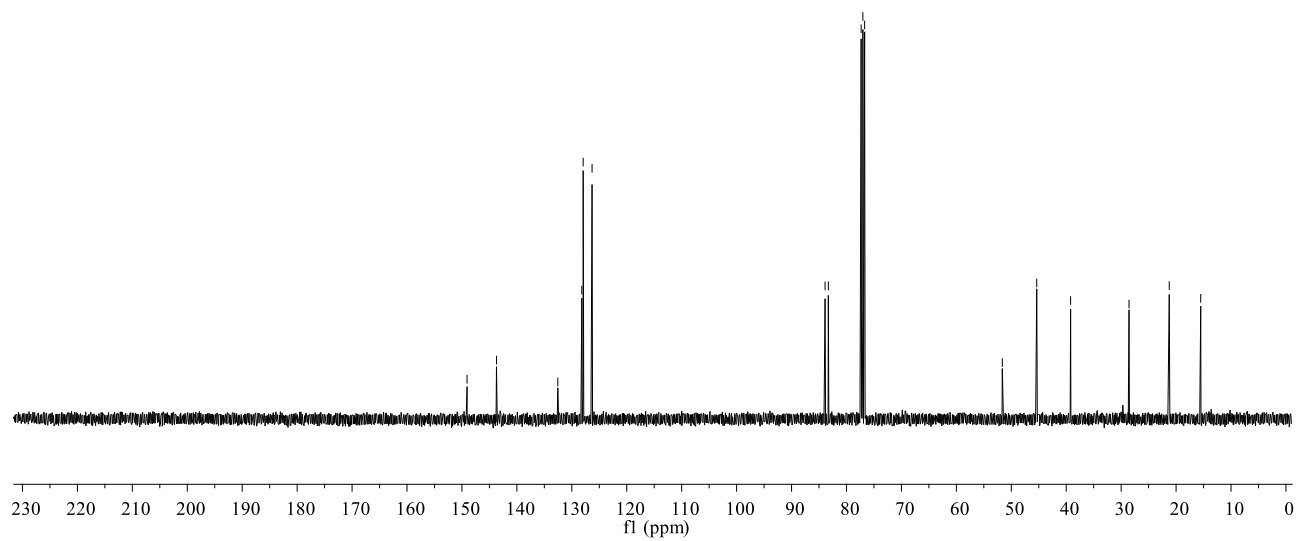

Supplement: d4cc03908d1.pdf [file d4cc03908d1.pdf]
